# Supplementary material for: Rhodium(iii)-catalyzed indole-directed carbenoid aryl C–H insertion/cyclization: access to 1,2-benzocarbazoles
Source: Royal Society of Chemistry journal article supplement (doi:10.1039/c7ra04889k), 2017-01-01

## Rhodium(III)-Catalyzed Indole-Directed Carbenoid Aryl C-H Insertion/Cyclization: Access to 1, 2-Benzocarbazoles

Zhenhui Zhang,<sup>a</sup> Kunkun Liu,<sup>b</sup> Xun Chen,<sup>a</sup> Shi-Jian Su,<sup>\*,b</sup> Yuanfu Deng,<sup>c</sup> and Wei  
Zeng<sup>\*,a</sup>

<sup>a</sup> Key Laboratory of Functional Molecular Engineering of Guangdong Province, School of Chemistry  
and Chemical Engineering, South China University of Technology, Guangzhou 510641, China

<sup>b</sup> State Key Laboratory of Luminescent Materials and Devices and Institute of Polymer Optoelectronic  
Materials and Devices, South China University of Technology, Guangzhou 510641, China

### Supporting Information

#### Table of Contents

|                                                                                        |    |
|----------------------------------------------------------------------------------------|----|
| 1. General Experimental Information .....                                              | 2  |
| 2 General Procedure for the Synthesis of Compounds <b>3a-3gz</b> .....                 | 3  |
| 3 General Procedure for the Synthesis of Compounds <b>4a-4g</b> .....                  | 15 |
| 4 General Procedure for the Synthesis of Compound <b>5a</b> .....                      | 18 |
| 5. Preliminary Mechanistic Studies.....                                                | 20 |
| 6. Photophysical Data of the Representative Derivatives .....                          | 26 |
| 7. Single Crystal Data about <b>3a</b> .....                                           | 29 |
| 8. Single Crystal Data about <b>4e</b> .....                                           | 39 |
| 9. References.....                                                                     | 67 |
| 10. <sup>1</sup> H NMR and <sup>13</sup> C NMR Spectrum for All Isolated Products..... | 68 |

## 1. General experimental information

All reactions were carried out in flame-dried sealed tubes with magnetic stirring. Unless otherwise noted, all experiments were performed under argon atmosphere. All reagents were purchased from TCI, Acros or Strem. Solvents were treated with 4 Å molecular sieves or sodium and distilled prior to use. The starting materials (2-arylindoles substrates) **1a-1y**,<sup>1</sup> and diazo compound **2a-2i**<sup>2</sup> were prepared according to the previously reported procedures. Purifications of reaction products were carried out by flash chromatography using Qingdao Haiyang Chemical Co. Ltd silica gel (40-63 mm). Infrared spectra (IR) were recorded on a Bruker TENSOR 27 FTIR spectrophotometer and are reported as wavelength numbers (cm<sup>-1</sup>). Infrared spectra were recorded by preparing a KBr pellet containing the title compound. <sup>1</sup>H NMR and <sup>13</sup>C NMR spectra were recorded with tetramethylsilane (TMS) as internal standard at ambient temperature unless otherwise indicated on a Bruker Avance DPX 600 Fourier Transform spectrometer operating at 400 MHz for <sup>1</sup>H NMR and 100 MHz for <sup>13</sup>C NMR. Chemical shifts are reported in parts per million (ppm) and coupling constants are reported as Hertz (Hz). Splitting patterns are designated as singlet (s), broad singlet (bs), doublet (d), triplet (t). Splitting patterns that could not be interpreted or easily visualized are designated as multiple (m). Low resolution mass spectra were recorded using a Waters HPLC/ZQ4000 Mass Spectrometer. High resolution mass spectra (HRMS) were recorded on an IF-TOF spectrometer (Micromass). Gas chromatograph mass spectra were obtained with a SHIMADZU model GCMS-QP5000 spectrometer. Crystal data were collected on a Bruker D8 Advance employing graphite monochromated Mo - K $\alpha$  radiation ( $\lambda$  = 0.71073 Å) at 293 (2) K and operating in the  $\phi$ - $\omega$ scan mode. The structure was solved by direct methods SHELXS-97.

UV-vis absorption spectra were recorded on a UV-2450 spectrophotometer. Photoluminescence (PL) spectra were measured using a Jobin-Yvon spectrofluorometer. Photoluminescence quantum yields (PLQYs) were measured on a HAMAMATSU absolute PL quantum yield spectrometer C11347 in solutions or films. Transient PL spectra were measured with an Edinburgh FL920 fluorescence spectrophotometer.

## 2 General Procedure for the Synthesis of Compounds 3a-3gz

All of the products (**3a-3gz**) were obtained according to the following procedure. To a screw capped vial with a spinvane triangular-shaped Teflon stir bar were added 2-arylindoles (0.2 mmol), diazo compounds (0.4 mmol), [RhCp\*Cl<sub>2</sub>]<sub>2</sub> (6.0 mg, 0.01 mmol, 5 mol %), Na<sub>2</sub>CO<sub>3</sub> (42.4 mg, 0.4 mmol, 200 mol %), CuCl (9.9 mg, 0.1 mmol, 50 mol %), NaOAc (5 mg, 0.06mmol, 30 mol %), and acetonitrile (2.0 mL) under an Ar atmosphere. The reaction mixture was stirred at 80 °C for 8 h, filtered through a pad of celite and then washed with ethyl acetate (10 mL × 3). Organic solvents were removed under reduced pressure and the residue was purified by chromatography on silica gel with ethyl acetate/petroleum (v/v = 1/4) as the eluent to give the desired products. All of the yields are isolated yield.

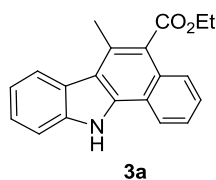

**Ethyl 6-methyl-11H-benzo[a]carbazole-5-carboxylate (3a)**<sup>3</sup>: Yellow solid. m.p. 193-195 °C. 50.8 mg, 50.8 % yield. <sup>1</sup>HNMR (400 MHz, CDCl<sub>3</sub>) δ 9.02 (s, 1H), 8.16 (d, *J* = 8.0 Hz, 1H), 8.02 – 7.94 (m, 1H), 7.93 – 7.83 (m, 1H), 7.52 (d, *J* = 8.1 Hz, 1H), 7.48 – 7.37 (m, 3H), 7.28 (t, *J* = 7.5 Hz, 1H), 4.59 (q, *J* = 7.1 Hz, 2H), 2.90 (s, 3H), 1.49 (t, *J* = 7.1 Hz, 3H); <sup>13</sup>CNMR (100 MHz, CDCl<sub>3</sub>) δ 170.8, 138.7, 135.3, 130.6, 128.9, 126.1, 125.4, 124.9, 124.6, 124.6, 123.2, 122.2, 120.5, 120.23, 119.3, 117.1, 111.1, 61.3, 18.6, 14.4. HR-MS (ESI) calcd for [M + 1]<sup>+</sup>: C<sub>20</sub>H<sub>17</sub>NO<sub>2</sub>: 304.1332, found: 304.1339; IR (KBr): 3680, 2804, 2283, 1583, 1506, 1433, 1288, 1201, 1054, 959, 739 cm<sup>-1</sup>.

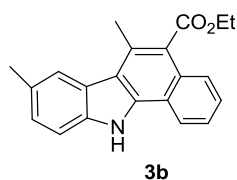

**Ethyl 6,8-dimethyl-11H-benzo[a]carbazole-5-carboxylate (3b)**: Yellow solid. m.p. 158-160 °C. 52 mg, 82% yield. <sup>1</sup>H NMR (400 MHz, CDCl<sub>3</sub>) δ 8.89 (s, 1H), 8.03 – 7.84 (m, 3H), 7.51 – 7.37 (m, 3H), 7.25 – 7.20 (m, 1H), 4.59 (q, *J* = 7.1 Hz, 2H), 2.91 (s, 3H), 2.55 (s, 3H), 1.49 (t, *J* = 7.1 Hz, 3H); <sup>13</sup>C NMR (100 MHz, CDCl<sub>3</sub>) δ 170.9, 137.0, 135.6, 130.8, 129.4, 128.8, 126.0, 126.0, 125.3, 124.8, 124.8, 122.9, 122.0, 120.5, 119.3, 116.8, 110.7, 61.3, 21.7, 18.7, 14.4. HR-MS (ESI) calcd for

[M + 1]<sup>+</sup>: C<sub>21</sub>H<sub>20</sub>NO<sub>2</sub>: 318.1489, found: 318.1491; IR (KBr): 3443, 2929, 1551, 1460, 1223, 1123, 788 cm<sup>-1</sup>.

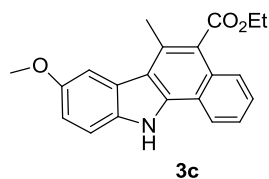

**Ethyl 8-methoxy-6-methyl-11H-benzo[a]carbazole-5-carboxylate (3c):** Yellow solid. m.p. 163-165 °C. 50 mg, 75% yield. <sup>1</sup>H NMR (400 MHz, CDCl<sub>3</sub>) δ 8.89 (s, 1H), 7.91 (dd, J = 27.7, 7.2 Hz, 1H), 7.63 (d, J = 2.3 Hz, 3H), 7.42 (ddd, J = 14.9, 6.2, 3.5 Hz, 1H), 7.05 (dd, J = 8.7, 2.4 Hz, 1H), 4.58 (q, J = 7.1 Hz, 1H), 3.92 (s, 2H), 2.87 (d, J = 3.8 Hz, 3H), 1.49 (t, J = 7.1 Hz, 3H); <sup>13</sup>C NMR (100 MHz, CDCl<sub>3</sub>) δ 170.8, 154.2, 136.2, 133.8, 130.6, 128.9, 126.1, 125.4, 125.1, 124.9, 122.8, 120.5, 119.4, 117.0, 113.5, 111.6, 105.6, 61.3, 56.1, 29.7, 18.5, 14.4. HR-MS (ESI) calcd for [M + 1]<sup>+</sup>: C<sub>21</sub>H<sub>20</sub>NO<sub>3</sub>: 334.1438, found: 334.1443; IR (KBr): 3430, 2926, 1698, 1554, 1396, 1219, 1039, 761, 531 cm<sup>-1</sup>.

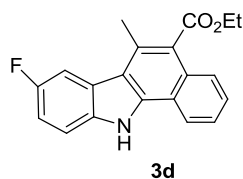

**N-(3-(Phenylsulfonamido)butyl)picolinamide (3d):** Yellow solid. m.p. 166-168 °C. 43.2 mg, 67% yield. <sup>1</sup>H NMR (400 MHz, CDCl<sub>3</sub>) δ 9.10 (s, 1H), 7.95 (s, 1H), 7.80 (dd, J = 23.3, 7.2 Hz, 2H), 7.51 – 7.34 (m, 3H), 7.14 (t, J = 8.1 Hz, 1H), 4.59 (dd, J = 14.0, 6.9 Hz, 2H), 2.82 (s, 3H), 1.50 (t, J = 7.0 Hz, 3H); <sup>13</sup>C NMR (100 MHz, CDCl<sub>3</sub>) δ 170.81, 157.7 (d, <sup>1</sup>J<sub>C-F</sub> = 230 Hz), 136.59, 135.09, 130.30, 129.00, 126.34, 125.1, 124.8 (d, <sup>2</sup>J<sub>C-F</sub> = 10 Hz), 123.17, 120.55, 119.29, 116.77, 112.5 (d, <sup>3</sup>J<sub>C-F</sub> = 26 Hz), 107.6 (d, <sup>4</sup>J<sub>C-F</sub> = 25 Hz), 61.48, 18.33, 14.46. HR-MS (ESI) calcd for [M + 1]<sup>+</sup>: C<sub>16</sub>H<sub>20</sub>N<sub>3</sub>O<sub>3</sub>S: 322.1238, found: 322.1246; IR (KBr): 3427, 2923, 1551, 1460, 1036, 790 cm<sup>-1</sup>.

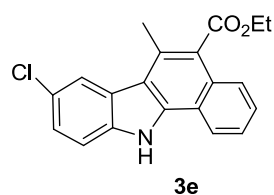

**Ethyl 8-chloro-6-methyl-11H-benzo[a]carbazole-5-carboxylate (3e):** Brown solid. m.p. 212-214 °C. 50.5 mg, 75% yield. <sup>1</sup>H NMR (400 MHz, CDCl<sub>3</sub>) δ 9.05 (s, 1H), 8.00 (d, J = 1.7 Hz,

1H), 7.88 (dd,  $J = 6.2, 3.2$  Hz, 1H), 7.82 – 7.75 (m, 1H), 7.43 – 7.33 (m, 3H), 7.31 (dd,  $J = 8.6, 1.9$  Hz, 1H), 4.63 – 4.55 (m, 2H), 2.77 (s, 3H), 1.50 (t,  $J = 7.2$  Hz, 3H);  $^{13}\text{C}$  NMR (100 MHz,  $\text{CDCl}_3$ )  $\delta$  170.7, 136.9, 136.0, 130.2, 129.0, 126.4, 125.5, 125.4, 125.3, 125.0, 124.6, 123.4, 121.5, 120.5, 119.1, 116.2, 112.0, 61.5, 18.4, 14.4. HR-MS (ESI) calcd for  $[\text{M} + 1]^+$ :  $\text{C}_{20}\text{H}_{17}\text{ClNO}_2$ : 338.0942, found: 338.0947; IR (KBr): 3429, 2924, 1552, 1458, 1393, 1221, 1121, 791  $\text{cm}^{-1}$ .

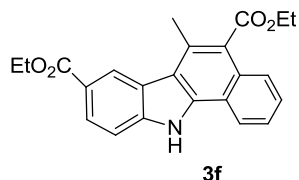

**Diethyl 6-methyl-11H-benzo[a]carbazole-5,8-dicarboxylate (3f):** Yellow solid. m.p. 228-230 °C. 40.5 mg, 54% yield.  $^1\text{H}$  NMR (400 MHz, acetone)  $\delta$  11.74 (s, 1H), 8.86 (s, 1H), 8.42 – 8.35 (m, 1H), 8.00 (dd,  $J = 8.6, 1.6$  Hz, 1H), 7.88 – 7.82 (m, 1H), 7.62 (d,  $J = 8.5$  Hz, 1H), 7.51 (dd,  $J = 6.7, 3.0$  Hz, 2H), 4.44 (q,  $J = 7.1$  Hz, 2H), 4.28 (q,  $J = 7.1$  Hz, 2H), 2.89 (s, 3H), 1.32 (dt,  $J = 21.0, 7.1$  Hz, 6H);  $^{13}\text{C}$  NMR (100 MHz, acetone)  $\delta$  170.4, 167.4, 143.0, 137.6, 130.8, 130.1, 127.4, 126.6, 126.4, 126.3, 125.3, 125.1, 124.8, 123.2, 122.4, 120.7, 117.7, 112.0, 61.8, 61.1, 18.7, 14.7, 14.7. HR-MS (ESI) calcd for  $[\text{M} + 1]^+$ :  $\text{C}_{23}\text{H}_{22}\text{NO}_4$ : 376.1543, found: 376.1549; IR (KBr): 3429, 2923, 1683, 1550, 1396, 1037, 754  $\text{cm}^{-1}$ .

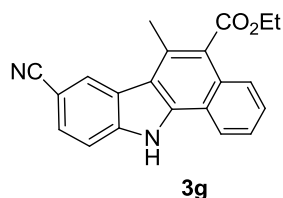

**Ethyl 8-cyano-6-methyl-11H-benzo[a]carbazole-5-carboxylate (3g):** Brown solid m.p. 178-181 °C. 24.9 mg, 38% yield.  $^1\text{H}$  NMR (400 MHz, acetone)  $\delta$  11.85 (s, 1H), 8.49 (s, 1H), 8.34 (dd,  $J = 6.1, 3.3$  Hz, 1H), 7.82 (dd,  $J = 6.3, 3.3$  Hz, 1H), 7.65 (d,  $J = 8.4$  Hz, 1H), 7.57 (dd,  $J = 8.4, 1.2$  Hz, 1H), 7.52 – 7.47 (m, 2H), 4.44 (q,  $J = 7.1$  Hz, 2H), 2.84 (s, 3H), 1.34 (t,  $J = 7.1$  Hz, 3H);  $^{13}\text{C}$  NMR (100 MHz, acetone)  $\delta$  169.4, 141.1, 136.8, 129.8, 129.4, 127.4, 126.9, 126.9, 125.5, 125.5, 124.8, 124.0, 121.6, 120.0, 119.6, 116.0, 112.4, 102.8, 60.9, 17.8, 13.8. HR-MS (ESI) calcd for  $[\text{M} + 1]^+$ :  $\text{C}_{21}\text{H}_{17}\text{N}_2\text{O}_2$ : 329.1285, found: 329.1286; IR (KBr): 3724, 2924, 2217, 1712, 1550, 1394, 1121, 1040  $\text{cm}^{-1}$ .

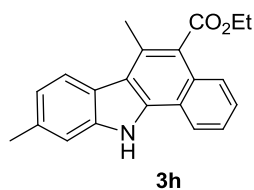

**Ethyl 6,9-dimethyl-11H-benzo[a]carbazole-5-carboxylate (3h):** Brown solid m.p. 219-221 °C. 41.2 mg, 65% yield. <sup>1</sup>H NMR (400 MHz, CDCl<sub>3</sub>) δ 8.91 (s, 1H), 7.99 (ddd, *J* = 35.9, 12.0, 7.2 Hz, 2H), 7.47 (p, *J* = 6.7 Hz, 1H), 7.29 (s, 1H), 7.10 (d, *J* = 8.1 Hz, 1H), 4.59 (q, *J* = 7.1 Hz, 2H), 2.91 (s, 3H), 2.50 (d, *J* = 10.2 Hz, 3H), 1.49 (t, *J* = 7.1 Hz, 3H); <sup>13</sup>C NMR (100 MHz, acetone) δ 170.7, 140.8, 136.5, 135.4, 130.9, 129.7, 126.6, 126.3, 125.8, 124.2, 123.0, 122.6, 122.4, 122.3, 120.7, 117.6, 112.3, 61.6, 21.9, 18.8, 14.7. HR-MS (ESI) calcd for [M + 1]<sup>+</sup>: C<sub>21</sub>H<sub>20</sub>NO<sub>2</sub>: 318.1489, found: 318.1494; IR (KBr): 3733, 2925, 2854, 1550, 1396, 1122, 792 cm<sup>-1</sup>.

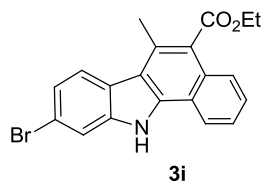

**Ethyl 9-bromo-6-methyl-11H-benzo[a]carbazole-5-carboxylate (3i):** Yellow solid. m.p. 189-191 °C. 46.6 mg, 78% yield. <sup>1</sup>H NMR (400 MHz, CDCl<sub>3</sub>) δ 8.99 (s, 1H), 8.05 – 7.96 (m, 2H), 7.89 (dd, *J* = 6.2, 3.4 Hz, 1H), 7.69 (s, 1H), 7.55 – 7.46 (m, 2H), 7.39 (d, *J* = 8.5 Hz, 1H), 4.60 (q, *J* = 7.1 Hz, 2H), 2.87 (s, 3H), 1.50 (t, *J* = 7.1 Hz, 3H); <sup>13</sup>C NMR (100 MHz, CDCl<sub>3</sub>) δ 174.7, 145.2, 141.1, 134.7, 133.6, 131.8, 130.6, 130.2, 128.7, 128.3, 127.8, 127.7, 127.2, 124.5, 122.5, 120.7, 119.2, 66.2, 23.4, 19.4. HR-MS (ESI) calcd for [M+1]<sup>+</sup>: C<sub>20</sub>H<sub>17</sub>BrNO<sub>2</sub>: 382.0437, found: 382.0439; IR (KBr): 3687, 2980, 1552, 1362, 1024, 783 cm<sup>-1</sup>.

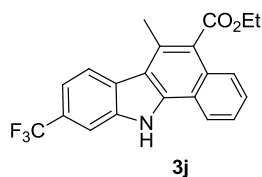

**Ethyl 6-methyl-9-(trifluoromethyl)-11H-benzo[a]carbazole-5-carboxylate (3j):** Yellow solid. m.p 160-162 43.7 mg, 58% yield. <sup>1</sup>H NMR (400 MHz, CDCl<sub>3</sub>) δ 9.24 (s, 1H), 8.16 (d, *J* = 8.4 Hz, 1H), 7.94 (dd, *J* = 6.0, 3.1 Hz, 1H), 7.85 – 7.75 (m, 2H), 7.52 – 7.42 (m, 3H), 4.61 (q, *J* = 7.1 Hz, 2H), 2.82 (s, 3H), 1.52 (t, *J* = 7.1 Hz, 3H); <sup>13</sup>C NMR (100 MHz, DMSO) δ 169.3, 138.0, 137.2, 129.3 (d, *J*<sub>C-F</sub> = 103 Hz), 127.14, 126.3, 126.1, 125.6, 125.0, 124.3 (d, *J*<sub>C-F</sub> = 33 Hz), 123.3, 122.6, 122.2, 119.3, 115.8 (d, <sup>3</sup>*J*<sub>C-F</sub> = 4 Hz), 115.1, 108.4 (d, <sup>4</sup>*J*<sub>C-F</sub> = 5 Hz), 61.1, 18.2, 14.1. HR-MS (ESI) calcd

for  $[M + 1]^+$ :  $C_{21}H_{17}F_3NO_2$ : 372.1206, found: 372.1205; IR (KBr): 3731, 2920, 2853, 1730, 1549, 1460, 1032, 792  $cm^{-1}$ .

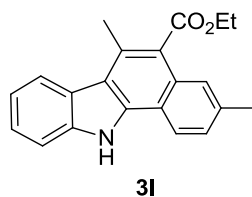

**Ethyl 3,6-dimethyl-11H-benzo[a]carbazole-5-carboxylate (3l)**: Red solid. m.p 187-189 38.6 mg, 61% yield.  $^1H$  NMR (400 MHz,  $CDCl_3$ )  $\delta$  8.95 (s, 1H), 8.15 (d,  $J = 7.9$  Hz, 1H), 7.83 (d,  $J = 8.3$  Hz, 1H), 7.60 (s, 1H), 7.51 (d,  $J = 8.1$  Hz, 1H), 7.39 (t,  $J = 7.6$  Hz, 1H), 7.31 – 7.16 (m, 2H), 4.60 (q,  $J = 7.1$  Hz, 2H), 2.89 (s, 3H), 2.41 (s, 3H), 1.50 (t,  $J = 7.1$  Hz, 3H);  $^{13}C$  NMR (100 MHz,  $CDCl_3$ )  $\delta$  171.0, 138.7, 135.9, 135.5, 130.5, 129.1, 126.8, 124.7, 124.5, 124.4, 122.7, 122.0, 120.4, 120.1, 117.3, 116.4, 111.1, 61.3, 21.9, 18.6, 14.4. HR-MS (ESI) calcd for  $[M + 1]^+$ :  $C_{21}H_{20}NO_2$ : 318.1489, found: 318.1490; IR (KBr): 3670, 2979, 1523, 1363, 1042, 892  $cm^{-1}$ .

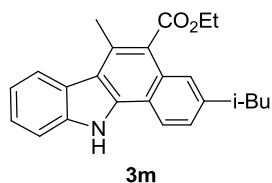

**Ethyl 3-isobutyl-6-methyl-11H-benzo[a]carbazole-5-carboxylate (3m)**: Yellow solid. m.p. 174-176  $^{\circ}C$ . 55.2 mg, 77% yield.  $^1H$  NMR (400 MHz,  $CDCl_3$ )  $\delta$  8.99 (s, 1H), 8.20 (d,  $J = 8.0$  Hz, 1H), 7.95 (d,  $J = 8.3$  Hz, 1H), 7.65 (s, 1H), 7.55 (d,  $J = 8.0$  Hz, 1H), 7.41 (t,  $J = 7.5$  Hz, 1H), 7.29 (t,  $J = 7.4$  Hz, 2H), 4.60 (q,  $J = 7.1$  Hz, 2H), 2.94 (s, 3H), 2.61 (d,  $J = 7.2$  Hz, 2H), 1.94 (dt,  $J = 13.5, 6.8$  Hz, 1H), 1.50 (t,  $J = 7.1$  Hz, 3H), 0.93 (d,  $J = 6.6$  Hz, 6H);  $^{13}C$  NMR (100 MHz,  $CDCl_3$ )  $\delta$  171.0, 139.7, 138.7, 135.6, 130.6, 129.1, 126.9, 125.0, 124.7, 124.4, 122.9, 122.0, 120.3, 120.1, 117.7, 116.5, 111.1, 61.3, 45.8, 30.2, 22.4, 18.71, 14.5. HR-MS (ESI) calcd for  $[M + 1]^+$ :  $C_{24}H_{26}NO_2$ : 360.1958, found: 360.1967; IR (KBr): 3347, 2917, 1706, 1583, 1224, 1047, 744  $cm^{-1}$ .

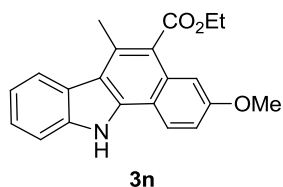

**Ethyl 3-methoxy-6-methyl-11H-benzo[a]carbazole-5-carboxylate (3n)**: Brown solid. m.p. 158-160  $^{\circ}C$ . 49.9 mg, 75% yield.  $^1H$  NMR (400 MHz,  $CDCl_3$ )  $\delta$  8.95 (s, 1H), 8.10 (d,  $J = 7.9$  Hz, 1H), 7.84 – 7.74 (m, 1H), 7.47 (d,  $J = 8.0$  Hz, 1H), 7.36 (t,  $J = 7.6$  Hz, 1H), 7.25 (dd,  $J = 10.2, 4.8$  Hz,

1H), 7.07 – 6.93 (m, 1H), 4.58 (q,  $J = 7.1$  Hz, 2H), 3.79 (s, 3H), 2.86 (s, 3H), 1.50 (t,  $J = 7.1$  Hz, 3H);  $^{13}\text{C}$  NMR (100 MHz,  $\text{CDCl}_3$ )  $\delta$  171.1, 157.8, 138.7, 135.8, 131.5, 130.3, 124.7, 124.1, 122.1, 122.0, 121.8, 120.0, 116.2, 115.6, 114.1, 111.0, 104.9, 61.3, 55.1, 18.7, 14.5. HR-MS (ESI) calcd for  $[\text{M} + 1]^+$ :  $\text{C}_{21}\text{H}_{20}\text{NO}_3$ : 334.1438, found: 334.1443; IR (KBr): 3346, 2930, 1701, 1575, 1216, 1041, 892  $\text{cm}^{-1}$ .

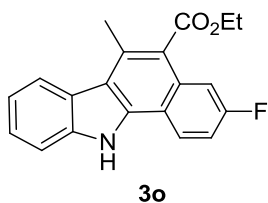

**Ethyl 3-fluoro-6-methyl-11H-benzo[a]carbazole-5-carboxylate (3o):** Yellow solid. m.p. 206-208 °C. 45.5mg, 71% yield.  $^1\text{H}$  NMR (400 MHz,  $\text{CDCl}_3$ )  $\delta$  9.00 (s, 1H), 8.10 (d,  $J = 8.0$  Hz, 1H), 7.92 (dd,  $J = 9.0, 5.6$  Hz, 1H), 7.57 – 7.48 (m, 2H), 7.42 (t,  $J = 7.3$  Hz, 1H), 7.28 (t,  $J = 7.6$  Hz, 1H), 7.18 (td,  $J = 8.6, 2.5$  Hz, 1H), 4.63 – 4.53 (m, 2H), 2.88 – 2.74 (m, 3H), 1.55 – 1.46 (m, 3H);  $^{13}\text{C}$  NMR (100 MHz, acetone)  $\delta$  170.2, 163.0, 160., 140., 136.7, 131.1 (d,  $^1J_{\text{C-F}} = 8$  Hz), 125.5, 125.1, (d,  $^2J_{\text{C-F}} = 9$  Hz), 125.0, 123.4, (d,  $^3J_{\text{C-F}} = 5$  Hz), 122.8, 120.9, 117.6, 117.3, 115.3, (d,  $^4J_{\text{C-F}} = 25$  Hz), 112.3, 110.2 (d,  $^5J_{\text{C-F}} = 23$  Hz), 61.8, 19.0, 14.7. HR-MS (ESI) calcd for  $[\text{M} + 1]^+$ :  $\text{C}_{20}\text{H}_{17}\text{FNO}_2$ : 322.1238, found: 322.1244; IR (KBr): 3763, 2930, 1532, 1374, 1213, 1023, 756  $\text{cm}^{-1}$ .

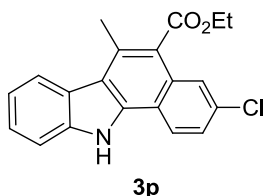

**Ethyl 3-chloro-6-methyl-11H-benzo[a]carbazole-5-carboxylate (3p):** Brown solid. m.p. 184-186 °C. 42.4 mg, 63% yield.  $^1\text{H}$  NMR (400 MHz,  $\text{CDCl}_3$ )  $\delta$  9.01 (s, 1H), 8.04 (d,  $J = 7.0$  Hz, 1H), 7.87 – 7.72 (m, 2H), 7.52 (d,  $J = 8.0$  Hz, 1H), 7.42 (t,  $J = 7.5$  Hz, 1H), 7.28 (dd,  $J = 17.1, 8.9$  Hz, 2H), 4.59 (q,  $J = 7.0$  Hz, 2H), 2.72 (d,  $J = 2.4$  Hz, 3H), 1.51 (t,  $J = 7.1$  Hz, 3H);  $^{13}\text{C}$  NMR (100 MHz,  $\text{CDCl}_3$ )  $\delta$  170.4, 138.8, 134.9, 132.1, 132.0, 129.5, 125.4, 124.9, 124.4, 124.3, 122.2, 122.0, 120.4, 117.3, 111.2, 61.5, 29.7, 18.5, 14.4. HR-MS (ESI) calcd for  $[\text{M} + 1]^+$ :  $\text{C}_{20}\text{H}_{17}\text{ClNO}_2$ : 338.0942, found: 338.0947; IR (KBr): 3754, 2922, 1698, 1560, 1370, 1094, 865  $\text{cm}^{-1}$ .



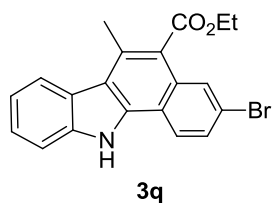

**Ethyl 3-bromo-6-methyl-11H-benzo[a]carbazole-5-carboxylate (3q):** Yellow solid. m.p. 201-203 °C. 46.6 mg, 61% yield.  $^1\text{H}$  NMR (400 MHz,  $\text{CDCl}_3$ )  $\delta$  8.97 (s, 1H), 8.07 (dd,  $J = 35.2, 4.7$  Hz, 2H), 7.80 (d,  $J = 8.7$  Hz, 1H), 7.58 – 7.42 (m, 3H), 7.30 (t,  $J = 7.6$  Hz, 1H), 4.60 (q,  $J = 7.1$  Hz, 2H), 2.79 (s, 3H), 1.52 (t,  $J = 7.1$  Hz, 3H);  $^{13}\text{C}$  NMR (100 MHz,  $\text{CDCl}_3$ )  $\delta$  170.2, 138.8, 135.0, 132.1, 130.00, 128.0, 127.7, 125.0, 124.3, 122.2, 122.1, 122.1, 120.5, 120.3, 117.6, 117.4, 111.3, 61.5, 18.6, 14.4. HR-MS (ESI) calcd for  $[\text{M} + 1]^+$ :  $\text{C}_{20}\text{H}_{17}\text{BrNO}_2$ : 382.0437, found: 382.0442; IR (KBr): 3361, 2925, 1699, 1552, 1263, 1042, 719  $\text{cm}^{-1}$ .

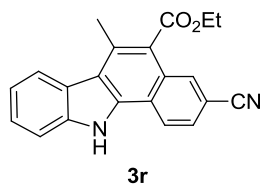

**Ethyl 3-cyano-6-methyl-11H-benzo[a]carbazole-5-carboxylate (3r):** Brown solid. m.p. 181-183 °C. 22.9 mg, 35% yield.  $^1\text{H}$  NMR (400 MHz, DMSO)  $\delta$  12.70 (s, 1H), 8.69 (d,  $J = 8.5$  Hz, 1H), 8.42 – 8.19 (m, 2H), 7.95 (d,  $J = 8.5$  Hz, 1H), 7.73 (d,  $J = 8.1$  Hz, 1H), 7.53 (t,  $J = 7.5$  Hz, 1H), 7.32 (t,  $J = 7.5$  Hz, 1H), 4.55 (q,  $J = 7.1$  Hz, 2H), 2.92 (s, 3H), 1.43 (q,  $J = 6.9$  Hz, 3H);  $^{13}\text{C}$  NMR (100 MHz, DMSO)  $\delta$  168.6, 139.5, 134.7, 132.5, 130.7, 127.0, 126.0, 125.6, 123.4, 123.0, 122.3, 122.0, 120.8, 120.2, 119.2, 118.1, 111.8, 108.3, 61.4, 18.4, 14.1. HR-MS (ESI) calcd for  $[\text{M} + 1]^+$ :  $\text{C}_{21}\text{H}_{17}\text{CN}_2\text{O}_2$ : 329.1285, found: 329.1281; IR (KBr): 3413, 2917, 2127, 1665, 1261, 1009, 824  $\text{cm}^{-1}$ .

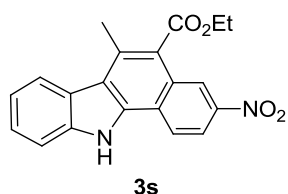

**Ethyl 6-methyl-3-nitro-11H-benzo[a]carbazole-5-carboxylate (3s):** Red solid. m.p. 198-200 °C. 31.3 mg, 45% yield.  $^1\text{H}$  NMR (400 MHz,  $\text{CDCl}_3$ )  $\delta$  8.94 (s, 1H), 8.10 (d,  $J = 7.9$  Hz, 1H), 7.74 (d,  $J = 9.2$  Hz, 1H), 7.50 (d,  $J = 8.0$  Hz, 1H), 7.39 (t,  $J = 7.5$  Hz, 1H), 7.28 – 7.24 (m, 1H), 7.19 (s, 1H), 7.03 (d,  $J = 9.1$  Hz, 1H), 4.58 (q,  $J = 7.1$  Hz, 2H), 3.88 (s, 2H), 2.79 (s, 3H), 1.49 (t,  $J = 7.1$  Hz, 3H);  $^{13}\text{C}$  NMR (100 MHz,  $\text{CDCl}_3$ )  $\delta$  171.1, 156.8, 138.9, 134.8, 128.0, 126.8, 124.7, 124.5,

123.9, 122.8, 122., 120.2, 120.0, 117.3, 111.1, 100.4, 61.3, 55.3, 18.3, 14.4. HR-MS (ESI) calcd for  $[M + 1]^+$ :  $C_{20}H_{17}ClN_2O_3$ ; 349.1183, found: 349.1186; IR (KBr): 3437, 2918, 1660, 1553, 1118, 823, 761  $cm^{-1}$ .

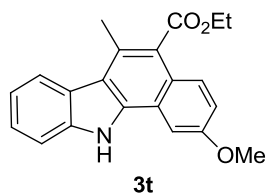

**Ethyl 2-methoxy-6-methyl-11H-benzo[a]carbazole-5-carboxylate (3t):** Brown solid. m.p. 190-192 °C. 44.6 mg, 67% yield.  $^1H$  NMR (400 MHz,  $CDCl_3$ )  $\delta$  8.59 (d,  $J = 4.5$  Hz, 1H), 8.28 (s, 1H), 8.17 (d,  $J = 7.8$  Hz, 1H), 7.85 (t,  $J = 7.7$  Hz, 1H), 7.80 (d,  $J = 7.9$  Hz, 2H), 7.47 - 7.41 (m, 1H), 7.25 (d,  $J = 7.9$  Hz, 2H), 5.05 (dd,  $J = 8.0, 3.9$  Hz, 1H), 3.60 (dq,  $J = 12.8, 6.3$  Hz, 1H), 3.41 - 3.27 (m, 2H), 2.39 (s, 3H), 1.90 - 1.79 (m, 1H), 1.60 (td,  $J = 13.8, 6.4$  Hz, 1H), 1.44 - 1.28 (m, 2H), 1.24 - 1.02 (m, 2H), 0.71 (t,  $J = 7.2$  Hz, 3H);  $^{13}C$  NMR (100 MHz,  $CDCl_3$ )  $\delta$  164.6, 149.9, 148.1, 143.2, 138.1, 137.3, 129.6, 127.0, 126.1, 122.1, 51.7, 37.5, 35.8, 34.9, 21.4, 18.5, 13.6. HR-MS (ESI) calcd for  $[M + 1]^+$ :  $C_{20}H_{19}NO_3$ ; 334.1438, found: 334.1444; IR (KBr): 3422, 2924, 1696, 1551, 1395, 1121, 784  $cm^{-1}$ .

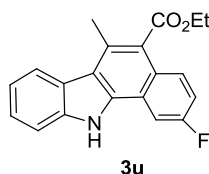

**Ethyl 2-fluoro-6-methyl-11H-benzo[a]carbazole-5-carboxylate (3u):** Yellow solid. m.p. 163-165 °C. 42.3 mg, 66% yield.  $^1H$  NMR (400 MHz,  $CDCl_3$ )  $\delta$  9.19 (s, 1H), 8.05 (d,  $J = 8.0$  Hz, 1H), 7.66 (d,  $J = 8.1$  Hz, 1H), 7.54 (d,  $J = 8.1$  Hz, 1H), 7.42 (t,  $J = 7.5$  Hz, 1H), 7.24 (dt,  $J = 13.1, 7.7$  Hz, 2H), 6.88 (dd,  $J = 12.6, 7.7$  Hz, 1H), 4.56 (q,  $J = 7.1$  Hz, 2H), 2.76 (s, 3H), 1.48 (t,  $J = 7.1$  Hz, 3H);  $^{13}C$  NMR (100 MHz,  $CDCl_3$ )  $\delta$  171.7, 159.0, 156.5, 139.0, 134.6, 134.5, 130.4, 124.8 (d,  $^1J_{C-F} = 8$ Hz), 124.7, 124.2, 122.1, 120.9 (d,  $^2J_{C-F} = 6$ Hz), 120.2, 118.4, 118.1 (d,  $^3J_{C-F} = 13$ Hz), 117.4, 116.6 (d,  $^4J_{C-F} = 4$ Hz), 111.4, 110.5 (d,  $^5J_{C-F} = 23$ Hz), 61.7, 17.8, 14.2. HR-MS (ESI) calcd for  $[M + 1]^+$ :  $C_{20}H_{17}FNO_2$ ; 322.1238, found: 322.1240; IR (KBr): 3433, 2924, 1551, 1395, 1121, 760  $cm^{-1}$ .

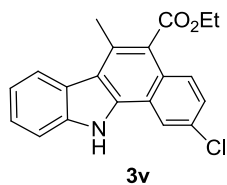

**Ethyl 2-chloro-6-methyl-11H-benzo[a]carbazole-5-carboxylate (3v):** Green solid. m.p. 192-194 °C. 45.2 mg, 67% yield. <sup>1</sup>H NMR (400 MHz, DMSO) δ 12.53 (s, 1H), 8.70 (d, *J* = 2.0 Hz, 1H), 8.25 (d, *J* = 8.0 Hz, 1H), 7.89 (d, *J* = 9.0 Hz, 1H), 7.71 (d, *J* = 8.1 Hz, 1H), 7.61 (dd, *J* = 9.0, 2.1 Hz, 1H), 7.49 (t, *J* = 7.5 Hz, 1H), 7.30 (t, *J* = 7.5 Hz, 1H), 4.51 (q, *J* = 7.1 Hz, 2H), 2.90 (s, 3H), 1.41 (t, *J* = 7.1 Hz, 3H); <sup>13</sup>C NMR (100 MHz, DMSO) δ 169.1, 139.1, 134.6, 130.6, 129.7, 127.1, 126.5, 126.4, 124.9, 123.2, 122.1, 121.9, 121.1, 120.2, 119.8, 116.7, 111.6, 61.0, 18.2, 14.1. HR-MS (ESI) calcd for [M + 1]<sup>+</sup>: C<sub>20</sub>H<sub>17</sub>ClNO<sub>2</sub>: 338.0942, found: 338.0943; IR (KBr): 3444, 2918, 1550, 1451, 1224, 1122, 794 cm<sup>-1</sup>.

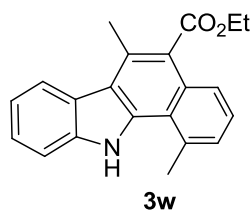

**Ethyl 1,6-dimethyl-11H-benzo[a]carbazole-5-carboxylate (3w):** Yellow solid. m.p. 195-197 °C. 49.4mg, 78% yield. <sup>1</sup>H NMR (400 MHz, CDCl<sub>3</sub>) δ 9.21 (s, 1H), 8.15 (d, *J* = 7.9 Hz, 1H), 7.67 (d, *J* = 8.3 Hz, 1H), 7.59 (d, *J* = 8.1 Hz, 1H), 7.44 (t, *J* = 7.5 Hz, 1H), 7.30 (t, *J* = 7.6 Hz, 2H), 7.19 (d, *J* = 6.6 Hz, 1H), 4.58 (q, *J* = 7.1 Hz, 2H), 2.99 (s, 3H), 2.77 (d, *J* = 5.1 Hz, 3H), 1.49 (t, *J* = 7.1 Hz, 3H); <sup>13</sup>C NMR (100 MHz, CDCl<sub>3</sub>) δ 171.2, 138.5, 135.7, 131.8, 129.7, 129.6, 127.4, 125.4, 124.4, 124.3, 123.5, 123.4, 122.2, 120.1, 119.6, 117.8, 111.2, 61.3, 23.86, 18.5, 14.4. HR-MS (ESI) calcd for [M + 1]<sup>+</sup>: C<sub>21</sub>H<sub>19</sub>ClNO<sub>2</sub>: 318.1489, found: 318.1491; IR (KBr): 3434, 2918, 1552, 1395, 1221, 1126, 746 cm<sup>-1</sup>.

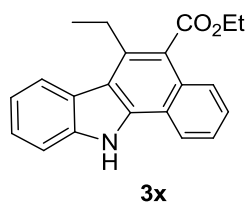

**Ethyl 6-ethyl-11H-benzo[a]carbazole-5-carboxylate (3x):** Read solide. m.p. 198-221 °C. 45.8 mg, 67% yield. <sup>1</sup>H NMR (400 MHz, CDCl<sub>3</sub>) δ 9.04 (s, 1H), 8.15 (d, *J* = 8.0 Hz, 1H), 8.05 (dd, *J* = 5.7, 3.7 Hz, 1H), 7.92 (dd, *J* = 6.1, 3.4 Hz, 1H), 7.58 (d, *J* = 8.1 Hz, 1H), 7.53 – 7.40 (m, 3H), 7.32 (t, *J* =

7.6 Hz, 1H), 4.59 (q,  $J = 7.1$  Hz, 2H), 3.31 (q,  $J = 7.5$  Hz, 2H), 1.51 (q,  $J = 7.2$  Hz, 6H).  $^{13}\text{C}$  NMR (100 MHz,  $\text{CDCl}_3$ )  $\delta$  170.8, 138.8, 136.4, 136.0, 129.0, 126.2, 125.5, 125.0, 124.6, 123.6, 122.8, 122.1, 120.6, 120.3, 119.5, 116.1, 111.3, 61.3, 25.6, 14.5, 14.4. HR-MS (ESI) calcd for  $[\text{M}+1]^+$ :  $\text{C}_{21}\text{H}_{20}\text{NO}_2$ ; 318.1489, found : 318.1496; IR (KBr): 3865, 2917, 1584, 1498, 1433, 1286, 1197, 1072, 978, 738  $\text{cm}^{-1}$ .

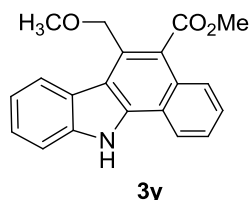

**Methyl 6-(methoxymethyl)-11H-benzo[a]carbazole-5-carboxylate (3y):** Green solid. m.p. 158-160 °C. 50.5mg, 79% yield.  $^1\text{H}$  NMR (400 MHz,  $\text{CDCl}_3$ )  $\delta$  9.22 (d,  $J = 3.3$  Hz, 1H), 8.12 (d,  $J = 8.0$  Hz, 1H), 7.88 (dd,  $J = 22.0, 8.2$  Hz, 2H), 7.42 (dd,  $J = 17.3, 8.3$  Hz, 2H), 7.36 (t,  $J = 7.3$  Hz, 2H), 7.25 (t,  $J = 8.2$  Hz, 1H), 5.03 (s, 2H), 4.08 (s, 3H), 3.42 (s, 3H).;  $^{13}\text{C}$  NMR (101 MHz,  $\text{CDCl}_3$ )  $\delta$  171.0, 138.9, 136.0, 129.5, 128.4, 126.2, 125.8, 124.9, 123.8, 123.5, 122.8, 120.7, 120.4, 120.3, 116.2, 111.1, 70.5, 58.0, 52.4. HR-MS (ESI) calcd for  $[\text{M} + 1]^+$ :  $\text{C}_{20}\text{H}_{18}\text{NO}_3$ : 320.1286, found: 320.1290; IR (KBr): 3475, 2928, 1712, 1585, 1355, 1209, 1068, 743  $\text{cm}^{-1}$ .

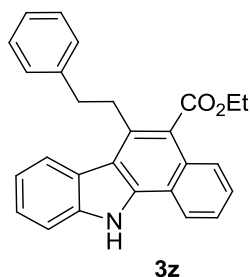

**Methyl 6-phenethyl-11H-benzo[a]carbazole-5-carboxylate (3z):** Cyan solid. m.p. 183-185 °C. 46.0 mg, 58% yield.  $^1\text{H}$  NMR (400 MHz,  $\text{CDCl}_3$ )  $\delta$  9.07 (s, 1H), 8.25 (d,  $J = 8.0$  Hz, 1H), 8.16 – 8.07 (m, 1H), 8.00 – 7.90 (m, 1H), 7.64 (d,  $J = 8.1$  Hz, 1H), 7.59 – 7.53 (m, 2H), 7.48 (t,  $J = 7.6$  Hz, 1H), 7.44 – 7.33 (m, 5H), 7.29 (dd,  $J = 5.8, 2.8$  Hz, 1H), 4.60 (q,  $J = 7.1$  Hz, 2H), 3.68 – 3.56 (m, 2H), 3.27 – 3.15 (m, 2H), 1.49 (t,  $J = 7.1$  Hz, 3H);  $^{13}\text{C}$  NMR (100 MHz,  $\text{CDCl}_3$ )  $\delta$  170.5, 141.8, 138.8, 135.9, 134.1, 129.1, 128.6, 128.2, 126.3, 126.2, 125.8, 125.3, 124.9, 123.8, 123.4, 122.00, 120.6, 120.5, 119.6, 116.3, 111.3, 61.4, 36.1, 34.1, 14.5. HR-MS (ESI) calcd for  $[\text{M} + 1]^+$ :  $\text{C}_{27}\text{H}_{24}\text{NO}_2$ : 394.1802, found: 394.1805; IR (KBr): 3500, 2945, 1749, 1486, 1361, 1015, 752  $\text{cm}^{-1}$ .

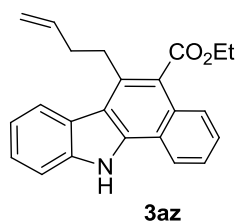

**Methyl 6-(but-3-en-1-yl)-11H-benzo[a]carbazole-5-carboxylate (3az):** Yellow solid. m.p. 178-180 °C. 46.9 mg, 68% yield. <sup>1</sup>H NMR (400 MHz, CDCl<sub>3</sub>) δ 9.07 (s, 1H), 8.06 (t, *J* = 9.5 Hz, 2H), 7.96 – 7.87 (m, 1H), 7.58 (d, *J* = 8.0 Hz, 1H), 7.52 – 7.40 (m, 3H), 7.32 (t, *J* = 7.6 Hz, 1H), 6.09 (ddt, *J* = 16.7, 10.3, 6.3 Hz, 1H), 5.17 (dd, *J* = 39.7, 13.7 Hz, 2H), 4.58 (q, *J* = 7.1 Hz, 2H), 3.47 – 3.15 (m, 2H), 2.63 (dt, *J* = 20.3, 10.1 Hz, 2H), 1.49 (t, *J* = 7.1 Hz, 3H); <sup>13</sup>C NMR (100 MHz, CDCl<sub>3</sub>) δ 170.8, 138.9, 138.0, 136.0, 134.3, 128.9, 126.2, 125.5, 125.1, 124.7, 123.6, 123.0, 121.8, 120.7, 120.4, 119.5, 116.1, 114.8, 111.4, 61.4, 33.8, 31.5, 14.5. HR-MS (ESI) calcd for [M + 1]<sup>+</sup>: C<sub>23</sub>H<sub>22</sub>NO<sub>2</sub>: 344.1645, found: 344.1646; IR (KBr): 3697, 2985, 1749, 1579, 1485, 1360, 923 cm<sup>-1</sup>.

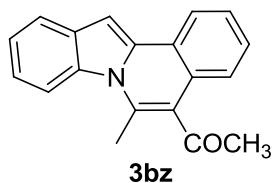

**1-(6-methylindolo [2,1-a]isoquinolin-5-yl) ethanone (3bz)**<sup>3</sup>: Green solide. m.p. 199-201 °C. 45.8 mg, 67% yield. <sup>1</sup>H NMR (400 MHz, CDCl<sub>3</sub>) δ 8.22 – 8.04 (m, 2H), 7.81 (d, *J* = 7.8 Hz, 1H), 7.43 (tdd, *J* = 8.6, 7.2, 1.3 Hz, 2H), 7.37 – 7.20 (m, 4H), 2.92 (d, *J* = 16.2 Hz, 3H), 2.62 (s, 3H); <sup>13</sup>C NMR (100 MHz, CDCl<sub>3</sub>) δ 205.5, 135.4, 133.4, 132.3, 130.1, 127.7, 127.1, 125.5, 124.8, 123.7, 123.3, 122.2, 122.0, 121.1, 120.8, 115.0, 95.2, 33.3, 19.7. HR-MS (ESI) calcd for [M+1]<sup>+</sup>: C<sub>19</sub>H<sub>15</sub>NO; 274.1226, found : 274.1230; IR (KBr): 3683, 2915, 1697, 1585, 1491, 1331, 976, 741 cm<sup>-1</sup>.

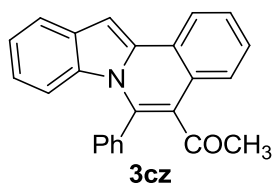

**1-(6-phenylindolo[2,1-a]isoquinolin-5-yl)ethanone (3cz):** Cyan solid. m.p. 196-198 °C. 52.2 mg, 78% yield. <sup>1</sup>H NMR (400 MHz, CDCl<sub>3</sub>) δ 8.50 (d, *J* = 4.6 Hz, 1H), 8.20 (s, 1H), 8.13 (d, *J* = 7.8 Hz, 1H), 7.86 (dd, *J* = 10.9, 4.4 Hz, 1H), 7.69 (d, *J* = 8.1 Hz, 2H), 7.44 (dd, *J* = 7.4, 4.8 Hz, 1H), 7.04 (d, *J* = 8.1 Hz, 2H), 5.50 (d, *J* = 5.9 Hz, 1H), 3.55 - 3.45 (m, 2H), 3.40 - 3.32 (m, 1H),

2.26 (s, 3H), 1.19 (d,  $J = 6.1$  Hz, 3H);  $^{13}\text{C}$  NMR (100 MHz,  $\text{CDCl}_3$ )  $\delta$  165.5, 149.2, 148.0, 142.8, 137.7, 137.3, 129.4, 126.9, 126.3, 122.3, 51.3, 44.6, 21.4, 20.0. HR-MS (ESI) calcd for  $[\text{M} + 1]^+$ :  $\text{C}_{24}\text{H}_{18}\text{NO}$ : 336.1383, found: 336.1387; IR (KBr): 3710, 2913, 1665, 1590, 1377, 1235, 892  $\text{cm}^{-1}$ .

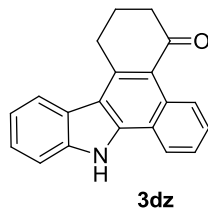

**2,3-Dihydro-1H-dibenzo[a,c]carbazol-4(9H)-one (3dz)**<sup>3</sup>: Yellow solid. m.p. 183-185 °C. 35.9 mg, 63% yield.  $^1\text{H}$  NMR (400 MHz, DMSO)  $\delta$  12.68 (s, 1H), 9.59 (dd,  $J = 6.3, 3.6$  Hz, 1H), 8.57 (dd,  $J = 6.3, 3.2$  Hz, 1H), 8.27 (d,  $J = 8.0$  Hz, 1H), 7.75 – 7.62 (m, 3H), 7.50 (t,  $J = 7.6$  Hz, 1H), 7.34 (d,  $J = 7.7$  Hz, 1H), 3.70 (t,  $J = 6.0$  Hz, 2H), 2.77 (m, 2H), 2.26 (m, 2H);  $^{13}\text{C}$  NMR (100 MHz, DMSO)  $\delta$  198.7, 145.5, 139.3, 138.4, 130.09, 127.4, 127.2, 125.2, 124.8, 123.7, 122.2, 121.9, 120.4, 120.1, 119.3, 114.8, 111.8, 28.8, 22.1. HR-MS (ESI) calcd for  $[\text{M} + 1]^+$ :  $\text{C}_{20}\text{H}_{16}\text{NO}$ : 286.1226, found: 286.1230; IR (KBr): 3697, 2985, 1689, 1579, 1425, 1360, 723  $\text{cm}^{-1}$ .

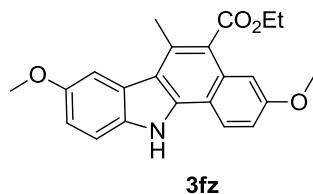

**Ethyl 3,8-dimethoxy-6-methyl-11H-benzo[a]carbazole-5-carboxylate (3fz)**: Brown solid. m.p. 232-234 °C. 19.2 mg, 4 % yield.  $^1\text{H}$  NMR (400 MHz,  $\text{CDCl}_3$ )  $\delta$  8.79 (s, 1H), 7.91 – 7.78 (m, 1H), 7.60 (s, 1H), 7.39 (d,  $J = 8.7$  Hz, 1H), 7.21 (s, 1H), 7.10 – 6.96 (m, 2H), 4.58 (q,  $J = 7.1$  Hz, 2H), 3.92 (s, 3H), 3.85 (s, 3H), 2.85 (d,  $J = 8.2$  Hz, 3H), 1.50 (t,  $J = 7.1$  Hz, 3H);  $^{13}\text{C}$  NMR (100 MHz,  $\text{CDCl}_3$ )  $\delta$  170.9, 157.9, 154.2, 136.7, 133.7, 131.5, 130.4, 125.3, 122.1, 121.9, 116.3, 115.7, 114.3, 112.8, 111.4, 105.6, 105.1, 61.2, 56.1, 55.1, 18.7, 14.5. HR-MS (ESI) calcd for  $[\text{M} + 1]^+$ :  $\text{C}_{22}\text{H}_{22}\text{NO}_4$ : 364.1385, found: 364.1458; IR (KBr): 3427, 2914, 1631, 1568, 1491, 1252, 1123, 752  $\text{cm}^{-1}$ .

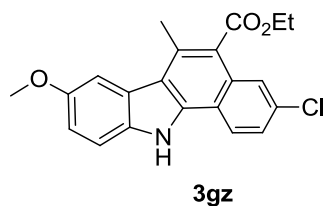

**Ethyl 3-chloro-8-methoxy-6-methyl-11H-benzo[a]carbazole-5-carboxylate (3gz):** Brown solid. m.p. 203-205 °C. 15.3 mg, 7 % yield. <sup>1</sup>H NMR (400 MHz, acetone) δ 11.33 (s, 1H), 8.40 (dd, *J* = 8.8, 3.8 Hz, 1H), 7.92 (d, *J* = 1.8 Hz, 1H), 7.70 (d, *J* = 2.4 Hz, 1H), 7.55 – 7.46 (m, 2H), 7.07 (dd, *J* = 8.8, 2.4 Hz, 1H), 4.59 – 4.45 (m, 2H), 3.94 – 3.83 (m, 3H), 2.92 (d, *J* = 2.7 Hz, 3H), 1.44 (t, *J* = 7.1 Hz, 3H); <sup>13</sup>C NMR (100 MHz, acetone) δ 169.2, 154.5, 136.1, 134.4, 132.5, 131.3, 129.8, 125.2, 124.4, 124.3, 123.5, 121.8, 118.2, 117.0, 114.2, 112.0, 104.9, 60.9, 55.2, 18.1, 13.8. HR-MS (ESI) calcd for [M + 1]<sup>+</sup>: C<sub>21</sub>H<sub>19</sub>ClNO<sub>3</sub>: 368.0912, found: 368.0881; IR (KBr): 3514, 2934, 1686, 1590, 1375, 1260, 1121, 733 cm<sup>-1</sup>.

### 3 General Procedure for the Synthesis of Compounds 4a-4g

All of the products (**4a-4g**) were obtained according to the following procedure. To a screw capped vial with a spinnane triangular-shaped Teflon stir bar were added 2-arylindoles (0.2 mmol), diazo compounds (0.8 mmol), [RhCp\*Cl<sub>2</sub>]<sub>2</sub> (6.0 mg, 0.01 mmol, 5 mol %), PivOH (40.8 mg, 0.4 mmol, 200 mol %), and AgOAc (6 mg, 0.06 mmol, 30 mol %), TFE (1.5 mL) under an Ar atmosphere. The reaction mixture was stirred at 120°C for 24 h, filtered through a pad of celite and then washed with ethyl acetate (10 mL × 3). Organic solvents were removed under reduced pressure and the residue was purified by chromatography on silica gel with ethyl acetate/petroleum (v/v = 1/4) as the eluent to give the desired products.

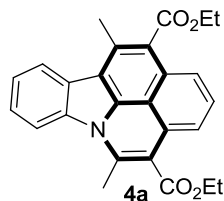

**Diethyl 5,11-dimethylisoquinolino[2,1,8-lma]carbazole-4,12-dicarboxylate (4a)**<sup>3</sup>: Cyan solid. m.p. 212-214 °C. 37.2 mg, 45% yield. <sup>1</sup>H NMR (400 MHz, CDCl<sub>3</sub>) δ 8.28 (s, 1H), 8.13 (d, *J* = 2.8 Hz, 1H), 7.84 (d, *J* = 8.3 Hz, 1H), 7.68 (t, *J* = 8.0 Hz, 1H), 7.48 – 7.36 (m, 3H), 4.58 (dq, *J* = 14.2, 7.1 Hz, 4H), 2.98 (d, *J* = 14.6 Hz, 6H), 1.52 (dt, *J* = 12.8, 6.5 Hz, 6H); <sup>13</sup>C NMR (100 MHz, CDCl<sub>3</sub>) δ 169.9, 168.1, 136.6, 135.4, 133.4, 131.8, 128.8, 127.4, 126.4, 125.8, 123.5, 122.6, 122.4, 121.9, 119.8, 115.8, 115.2, 114.51, 111.3, 61.58, 6.19, 2.70, 19.4, 18.6, 14.5, 14.4. HR-MS (ESI) calcd for [M + 1]<sup>+</sup>: C<sub>26</sub>H<sub>24</sub>NO<sub>4</sub>: 414.1700, found: 414.1703; IR (KBr): 2922, 1692, 1548, 1443, 1221, 1064, 791 cm<sup>-1</sup>.

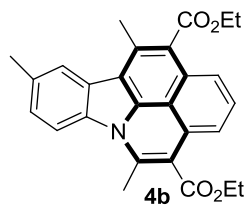

**Diethyl 5,9,11-trimethylisoquinolino[2,1,8-lma]carbazole-4,12-dicarboxylate (4b)**<sup>3</sup>: Cyan solid. m.p. 216-218 °C. 35.0 mg, 41% yield. <sup>1</sup>H NMR (400 MHz, CDCl<sub>3</sub>) δ 8.01 (dd, *J* = 21.9, 13.3 Hz, 2H), 7.83 (d, *J* = 8.3 Hz, 1H), 7.68 (t, *J* = 7.9 Hz, 1H), 7.46 (d, *J* = 7.6 Hz, 1H), 7.20 (d, *J* = 8.5 Hz, 1H), 4.59 (dq, *J* = 13.9, 7.0 Hz, 4H), 3.00 (d, *J* = 7.2 Hz, 6H), 2.53 (s, *J* = 13.0 Hz, 3H), 1.56 – 1.47 (m, 6H); <sup>13</sup>C NMR (100 MHz, CDCl<sub>3</sub>) δ 170.0, 168.2, 136.6, 133.6, 133.5, 131.9, 131.7, 128.8, 127.2, 126.4, 125.9, 124.9, 122.3, 121.8, 119.5, 118.8, 115.4, 115.0, 114.0, 111.0, 61.5, 61.1, 21.6, 19.3, 18.6, 14.5, 14.4. HR-MS (ESI) calcd for [M + 1]<sup>+</sup>: C<sub>27</sub>H<sub>26</sub>NO<sub>4</sub>: 428.1856, found: 428.1859; IR (KBr): 2920, 1714, 1623, 1587, 1444, 1179, 827 cm<sup>-1</sup>.

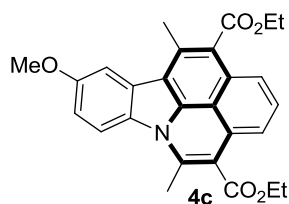

**Diethyl 9-methoxy-5,11-dimethylisoquinolino[2,1,8-lma]carbazole-4,12-dicarboxylate (4c)**<sup>3</sup>: Cyan solid. m.p. 201-203 °C. 60.3 mg, 68% yield. <sup>1</sup>H NMR (400 MHz, CDCl<sub>3</sub>) δ 8.04 (d, *J* = 8.8 Hz, 1H), 7.78 (d, *J* = 8.3 Hz, 1H), 7.61 (t, *J* = 7.9 Hz, 1H), 7.49 (s, 1H), 7.36 (d, *J* = 7.5 Hz, 1H), 6.92 (d, *J* = 8.8 Hz, 1H), 4.58 (dq, *J* = 14.0, 7.1 Hz, 4H), 3.88 (d, *J* = 17.3 Hz, 3H), 2.93 (d, *J* = 10.4 Hz, 6H), 1.51 (dd, *J* = 11.8, 6.9 Hz, 6H); <sup>13</sup>C NMR (100 MHz, CDCl<sub>3</sub>) δ 170.0, 168.2, 156.5, 136.3, 136.2, 133.1, 131.0, 128.2, 126.8, 126.0, 122.3, 122.1, 119.7, 119.6, 118.7, 115.7, 114.9, 111.3, 110.4, 99.4, 61.5, 61.1, 55.5, 19.1, 18.4, 14.5, 14.4. HR-MS (ESI) calcd for [M + 1]<sup>+</sup>: C<sub>27</sub>H<sub>26</sub>NO<sub>4</sub>: 444.1805, found: 444.1808; IR (KBr): 2921, 1716, 1456, 1280, 1083, 845, 617 cm<sup>-1</sup>.

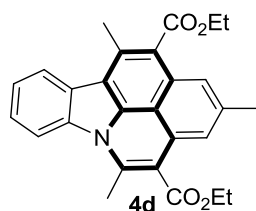

**Diethyl 2,5,11-trimethylisoquinolino[2,1,8-lma]carbazole-4,12-dicarboxylate (4d)**: Cyan solid. m.p. 188-190 °C. 55.5 mg, 65% yield. <sup>1</sup>H NMR (400 MHz, CDCl<sub>3</sub>) δ 8.44 – 8.37 (m, 1H), 8.28



(dd,  $J = 6.1, 3.1$  Hz, 1H), 7.67 (s, 1H), 7.58 – 7.48 (m, 2H), 7.32 (s, 1H), 4.59 (dq,  $J = 10.4, 7.1$  Hz, 4H), 3.10 (d,  $J = 7.1$  Hz, 3H), 3.03 (s, 3H), 2.62 (d,  $J = 8.2$  Hz, 3H), 1.52 (td,  $J = 7.1, 3.7$  Hz, 6H);  $^{13}\text{C}$  NMR (100 MHz,  $\text{CDCl}_3$ )  $\delta$  170.1, 168.2, 137.6, 136.6, 135.6, 133.7, 131.8, 129.1, 126.3, 126.1, 123.3, 122.4, 122.1, 121.9, 119.7, 117.29, 116.7, 115.6, 114.5, 110.8, 61.5, 61.1, 23.0, 19.5, 18.6, 14.5, 14.3. HR-MS (ESI) calcd for  $[\text{M} + 1]^+$ :  $\text{C}_{27}\text{H}_{26}\text{NO}_4$ : 428.1856, found: 428.1857; IR (KBr): 2930, 1720, 1545, 1393, 1222, 1025, 749  $\text{cm}^{-1}$ .

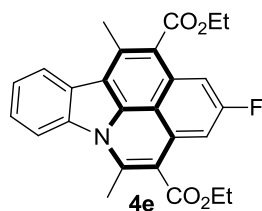

**Diethyl 2-fluoro-5,11-dimethylisoquinolino[2,1,8-lma]carbazole-4,12-dicarboxylate (4e)** <sup>3</sup>:

Cyan solid. m.p. 197-199 °C. 28.5 mg, 33% yield.  $^1\text{H}$  NMR (400 MHz,  $\text{CDCl}_3$ )  $\delta$  8.22 (d,  $J = 48.2$  Hz, 2H), 7.49 (d,  $J = 7.2$  Hz, 3H), 7.20 (d,  $J = 9.5$  Hz, 1H), 4.58 (p,  $J = 7.2$  Hz, 4H), 2.98 (dd,  $J = 33.0, 5.9$  Hz, 6H), 1.52 (t,  $J = 6.9$  Hz, 6H);  $^{13}\text{C}$  NMR (100 MHz,  $\text{CDCl}_3$ )  $\delta$  169.4, 167.6, 163.6, 161.2, 138.5, 135.5, 133.6, 133.1, 130.2, (d,  $^1J_{\text{C-F}} = 11\text{Hz}$ ), 128.5, (d,  $^2J_{\text{C-F}} = 11\text{Hz}$ ), 125.9, 123.7, 122.8, 122.0, 115.8, 115.0, 114.7, 111.0, 105.2, (d,  $^3J_{\text{C-F}} = 25\text{Hz}$ ), 104.3, (d,  $^4J_{\text{C-F}} = 28\text{Hz}$ ), 61.7, 61.3, 29.7, 19.5, 18.7, 14.4, 14.3. HR-MS (ESI) calcd for  $[\text{M} + 1]^+$ :  $\text{C}_{26}\text{H}_{23}\text{FNO}_4$ : 432.1606, found: 432.1608; IR (KBr): 2927, 1708, 1551, 1396, 1216, 1124, 746, 577  $\text{cm}^{-1}$ .

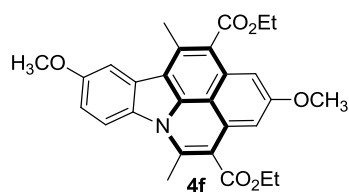

**Diethyl 2,9-dimethoxy-5,11-dimethylisoquinolino[2,1,8-lma]carbazole-4,12-dicarboxylate (4f)**

Cyan solid. m.p. 223-225 °C. 35.0 mg, 37% yield.  $^1\text{H}$  NMR (400 MHz,  $\text{CDCl}_3$ )  $\delta$  8.03 (d,  $J = 9.2$  Hz, 1H), 7.69 (s, 1H), 7.27 (d,  $J = 7.7$  Hz, 2H), 7.09 (s, 1H), 7.01 (d,  $J = 9.2$  Hz, 1H), 4.75 – 4.39 (m, 4H), 3.96 (s, 6H), 2.99 (d,  $J = 19.9$  Hz, 6H), 1.52 (dd,  $J = 13.5, 6.6$  Hz, 6H);  $^{13}\text{C}$  NMR (100 MHz,  $\text{CDCl}_3$ )  $\delta$  168.9, 167.0, 158.5, 154.5, 136.4, 133.3, 131.8, 129.5, 129.4, 127.0, 126.2, 120.3, 114.1, 113.6, 113.5, 110.5, 109.00, 103.8, 100.9, 60.5, 60.0, 54.6, 54.4, 28.6, 18.3, 17.6, 13.5, 13.3. HR-MS (ESI) calcd for  $[\text{M} + 1]^+$ :  $\text{C}_{28}\text{H}_{28}\text{NO}_6$ : 474.1911, found: 474.1908; IR (KBr): 2927, 1710, 1555, 1464, 1363, 1120, 742  $\text{cm}^{-1}$ .

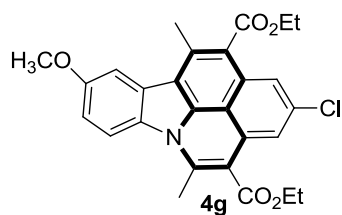

**Diethyl 2-chloro-9-methoxy-5, 11- dimethylisoquinolino [2, 1, 8- lma] carbazole-4, 12-dicarboxylate (4g):** Cyan solid. m.p. 227-229 °C. 49.6 mg, 52% yield. <sup>1</sup>H NMR (400 MHz, CDCl<sub>3</sub>) δ 7.85 (d, *J* = 8.6 Hz, 1H), 7.67 (s, 1H), 7.51 (s, 1H), 7.33 (s, 1H), 6.92 (d, *J* = 7.2 Hz, 1H), 4.59 (s, 4H), 3.93 (s, 3H), 2.90 (d, *J* = 21.5 Hz, 6H), 1.53 (s, 6H); <sup>13</sup>C NMR (100 MHz, CDCl<sub>3</sub>) δ 169.2, 167.5, 155.3, 138.0, 133.5, 132.9, 132.7, 129.7, 129.3, 127.5, 126.2, 121.0, 118.4, 116.4, 115.0, 113.6, 112.0, 110.8, 104.3, 61.6, 61.2, 55.3, 19.0, 18.3, 14.4, 14.3. HR-MS (ESI) calcd for [M + 1]<sup>+</sup>: C<sub>27</sub>H<sub>26</sub>ClNO<sub>5</sub>; 478.1416, found: 478.1411; IR (KBr): 2925, 1706, 1551, 1459, 1260, 1124, 746, 577 cm<sup>-1</sup>.

#### 4 General Procedure for the Synthesis of Compound 5a

To a stirred solution of **3a** (60.6 mg, 0.2 mmol) in dry DMF (3.0 mL), NaH (12.0 mg, 60% suspension in mineral oil, 0.3 mmol) was added portionwise under nitrogen atmosphere at 0 °C. The reaction mixture was then warmed to room temperature and stirred for 30 min. After cooling to 0 °C, MeI (0.018 mL, 0.3 mmol) was added dropwise to the reaction mixture. The reaction mixture was warmed to room temperature and stirred overnight. Water was added and the aqueous layer was extracted with ether. The combined organic layers were washed with brine, dried over anhydrous Na<sub>2</sub>SO<sub>4</sub> and concentrated under reduced pressure. The residue was purified by column chromatography on silica gel (*n*-hexane/ethyl acetate = 10/1) to give compound **5a** as yellow solid.

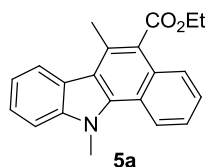

**Ethyl 6,11-dimethyl-11H-benzo[a]carbazole-5-carboxylate (5a)** <sup>4</sup>: Yellow solid. m.p. 195-197 °C. *R<sub>f</sub>* = 0.54 (petroleum ether / ethyl acetate = 4:1). 54.2 mg, 87% yield. <sup>1</sup>H NMR (400 MHz, CDCl<sub>3</sub>) δ 8.54 – 8.46 (m, 1H), 8.14 (d, *J* = 8.0 Hz, 1H), 7.86 (dd, *J* = 7.3, 2.2 Hz, 1H), 7.48 – 7.35 (m, 4H), 7.21 (ddd, *J* = 8.0, 5.9, 2.1 Hz, 1H), 4.50 (q, *J* = 7.1 Hz, 2H), 4.15 (s, 3H), 2.83 (s,

3H), 1.41 (t,  $J = 7.1$  Hz, 3H);  $^{13}\text{C}$  NMR (100 MHz,  $\text{CDCl}_3$ )  $\delta$  170.9, 141.0, 135.9, 130.1, 129.9, 125.7, 125.5, 124.5, 124.5, 123.9, 123.4, 122.3, 122.3, 120.9, 119.9, 117.5, 109.1, 61.3, 34.1, 18.9, 14.4. HR-MS (ESI) calcd for  $[\text{M} + 1]^+$ :  $\text{C}_{21}\text{H}_{20}\text{NO}_2$ : 318.1489, found: 318.1490; IR (KBr): 2918, 1687, 1541, 1443, 1254, 1023, 763, 689  $\text{cm}^{-1}$ .

## 5. Preliminary mechanistic studies

### (1): H/D Exchange of 2-phenylindole (*d1-1a*)

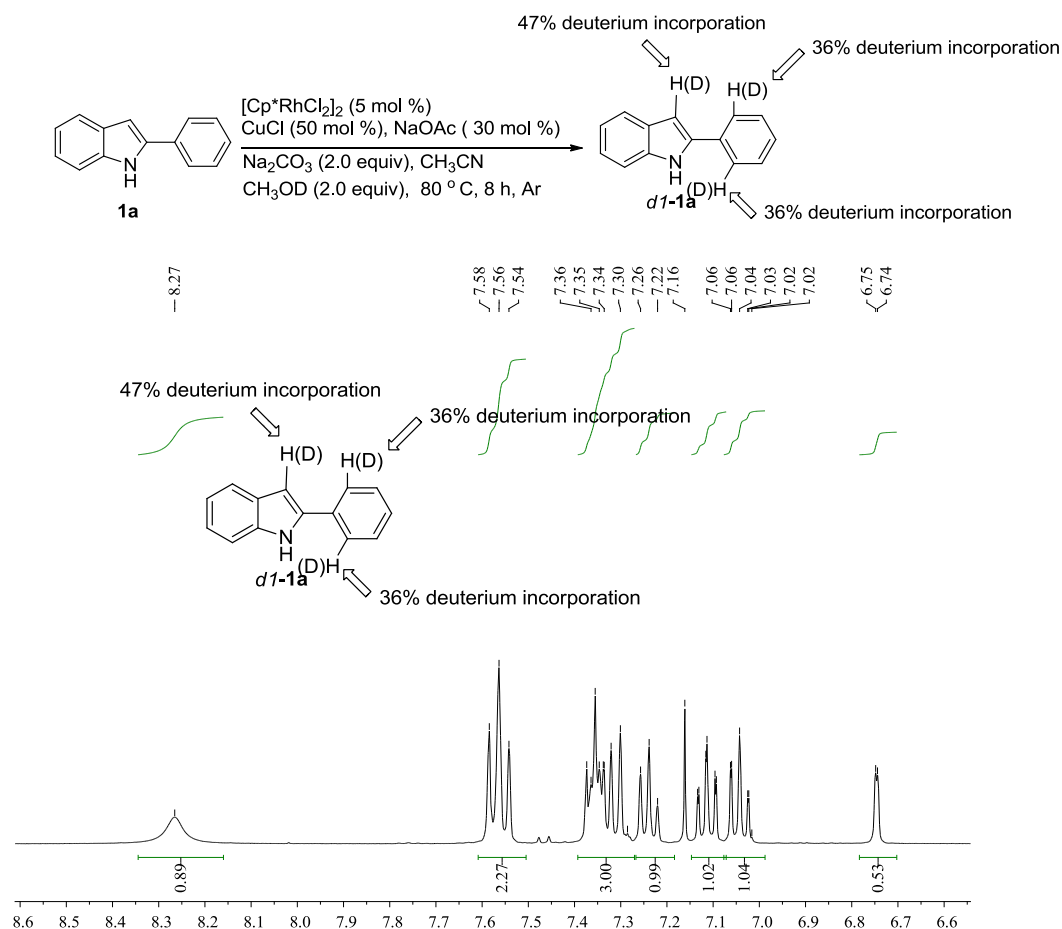

**Figure S1.** The conversion of *d1-1a* was monitored by  $^1\text{H}$  NMR method

H/D exchange of 2-phenylindole (*d1-1a*): To a screw capped vial with a spinvane triangular-shaped Teflon stir bar were added 2-phenylindole **1a** (19.3 mg, 0.1 mmol),  $[\text{RhCp}^*\text{Cl}_2]_2$  (3.0 mg, 0.005 mmol, 5 mol %), NaOAc (2.5 mg, 0.03 mmol, 30 mol %), CuCl (5mg, 0.05 mmol, 50 mol %),  $\text{Na}_2\text{CO}_3$ (21.2 mg, 0.2 mmol, 200 mol %),  $\text{CH}_3\text{OD}$  (6.6 mg, 0.2 mmol, 200 mol %) and  $\text{CH}_3\text{CN}$  (1.0 mL) under an Ar atmosphere. The corresponding reaction mixture was filtered through a pad of Celite, washed with EtOAc and concentrated under reduced pressure. The residue was purified by flash chromatography on silical gel to afford the desired compound *d1-1a* (97% yield) as gray solid. The deuterium incorporation was determined to be 47% and 36% by  $^1\text{H}$  NMR method (Support information, Figure S1).  $^1\text{H}$  NMR (400 MHz,  $\text{CDCl}_3$ )  $\delta$  8.27 (s, 1H), 7.56 (t,  $J = 8.5$  Hz, 2.27H), 7.39 – 7.27 (m, 3H), 7.24 (t,  $J = 7.4$  Hz, 1H), 7.15 – 7.07 (m, 1H), 7.08 – 6.99 (m, 1H), 6.75 (d,  $J = 1.6$  Hz, 0.53H).

## (2): H/D Exchange of 2-phenylindole (*d2-1a*)

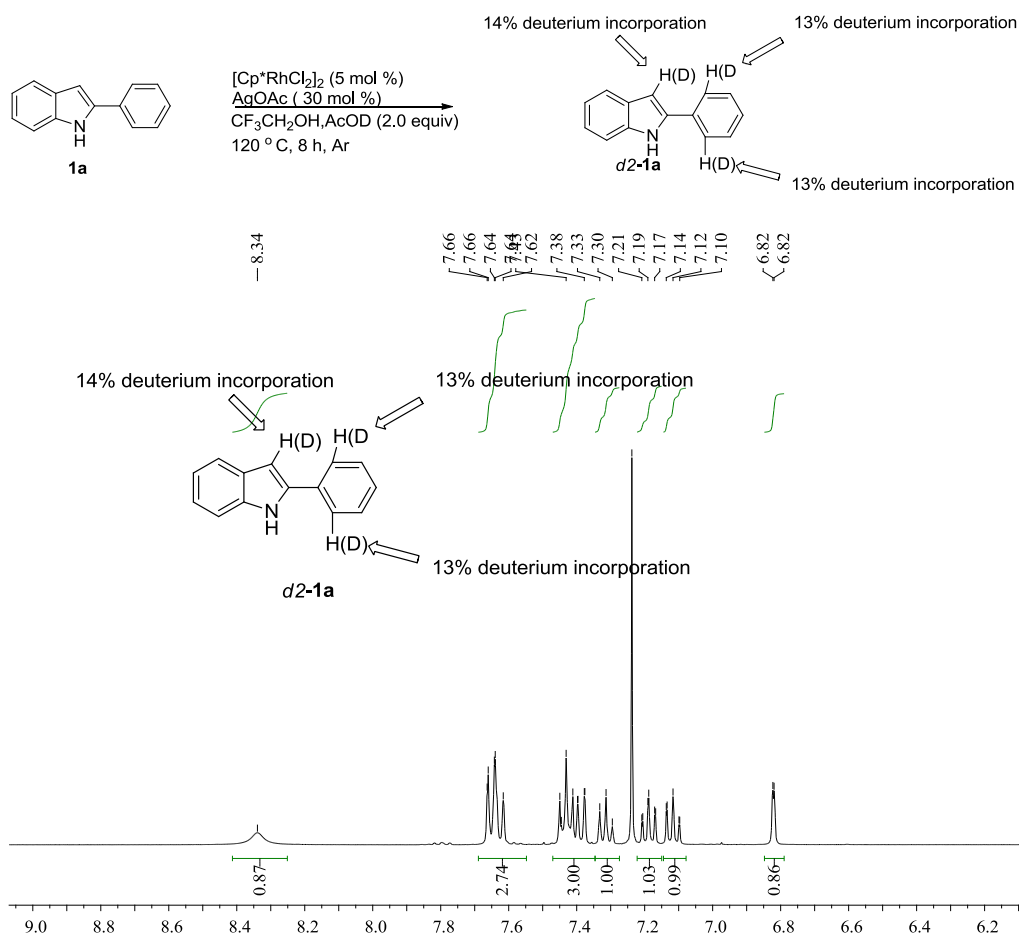

**Figure S2.** The conversion of *d2-1a* was monitored by  $^1\text{H}$  NMR method

H/D exchange of 2-phenylindole (*d2-1a*): To a screw capped vial with a spinvane triangular-shaped Teflon stir bar were added 2-phenylindole **1a** (19.3 mg, 0.1 mmol),  $[\text{RhCp}^*\text{Cl}_2]_2$  (3.0 mg, 0.005 mmol, 5 mol %), AgOAc (3 mg, 0.03 mmol, 30 mol %), PivOH (20.4 mg, 0.2 mmol, 200 mol %),  $\text{CH}_3\text{CO}_2\text{D}$  (20.4 mg, 0.2 mmol, 200 mol %) and  $\text{CF}_3\text{CH}_2\text{OH}$  (1.0 mL) under an Ar atmosphere. The corresponding reaction mixture was filtered through a pad of celite, washed with EtOAc and concentrated under reduced pressure. The residue was purified by flash chromatography on silical gel to afford the desired compound *d2-1a* (68% yield) as gray solid. The deuterium incorporation was determined to be 14% and 13% by  $^1\text{H}$  NMR method (Support information, Figure S2).  $^1\text{H}$  NMR (400 MHz,  $\text{CDCl}_3$ )  $\delta$  8.34 (s, 1H), 7.64 (dt,  $J = 10.5, 5.4$  Hz, 2.74H), 7.41 (ddd,  $J = 14.1, 7.7, 1.2$  Hz, 3H), 7.31 (t,  $J = 7.4$  Hz, 1H), 7.22 – 7.15 (m, 1H), 7.14 – 7.08 (m, 1H), 6.82 (d,  $J = 1.4$  Hz, 0.86H).

## (3): H/D Exchange of 1-methyl-2-phenyl-1H-indole (**1y**)

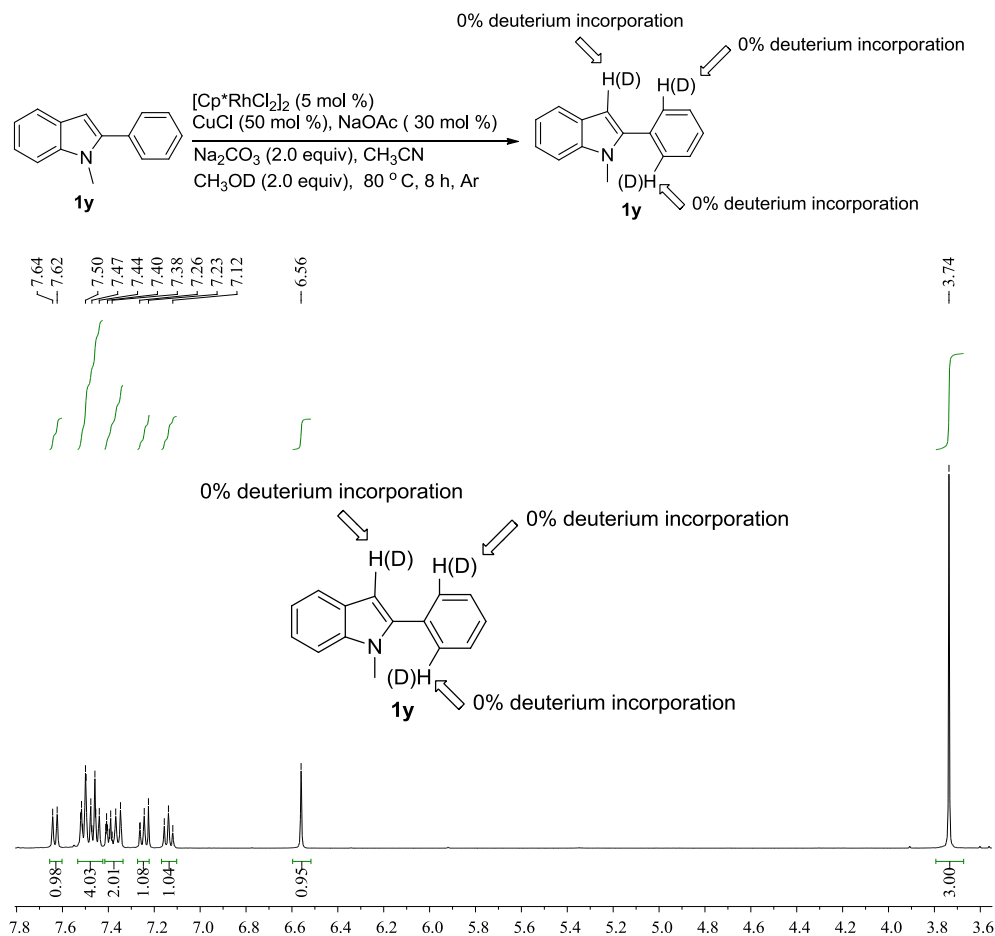

**Figure S3.** The conversion of **1y** was monitored by  $^1\text{H}$  NMR method

H/D exchange of 1-methyl-2-phenyl-1H-indole (**1y**): To a screw capped vial with a spinvane triangular-shaped Teflon stir bar were added 3-methyl-2-phenyl-1H-indole **1y** (20.7 mg, 0.1 mmol),  $[\text{RhCp}^*\text{Cl}_2]_2$  (3.0 mg, 0.005 mmol, 5 mol %), NaOAc (2.5 mg, 0.03 mmol, 30 mol %), CuCl (5mg, 0.05 mmol, 50 mol %),  $\text{Na}_2\text{CO}_3$  (21.2 mg, 0.2 mmol, 200 mol %),  $\text{CH}_3\text{OD}$  (6.6 mg, 0.2 mmol, 200 mol %) and  $\text{CH}_3\text{CN}$  (1.0 mL) under an Ar atmosphere. The corresponding reaction mixture was filtered through a pad of Celite, washed with EtOAc and concentrated under reduced pressure. The residue was purified by flash chromatography on silical gel to afford the desired compound **1y** (97% yield) as gray solid. The deuterium incorporation was determined to be 0% by  $^1\text{H}$  NMR method (SI, Figure S3).  $^1\text{H}$  NMR (400 MHz,  $\text{CDCl}_3$ )  $\delta$  7.63 (d,  $J = 7.8$  Hz, 1H), 7.53 – 7.42 (m, 4H), 7.42 – 7.34 (m, 2H), 7.25 (dd,  $J = 11.2, 4.1$  Hz, 1H), 7.14 (t,  $J = 7.4$  Hz, 1H), 6.56 (s, 1H), 3.74 (s, 3H).

#### (4) Competitive experiment

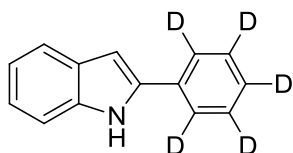

***d3-1a***

Procedure for the synthesis deuterated-2-phenylindole (*d3-1a*): A Schlenk tube equipped with a stirrer bar was charged with *N*-aryl imine (0.2 mmol), Pd(OAc)<sub>2</sub> (4.5 mg, 0.02 mmol, 10 mol %) and Cu(OAc)<sub>2</sub> (109 mg, 0.6 mmol, 3 equiv). The Schlenk tube was evacuated and refilled with N<sub>2</sub> for three times, followed by addition of DMSO (1 mL). The Schlenk tube was sealed with a Teflon screwcap and then the reaction mixture was stirred at 40 °C for 12 h. Upon cooling to room temperature, the reaction mixture was diluted with 5 mL of ethyl acetate, followed by filtration through a pad of silica gel. The filtrate was washed with water (10 mL), dried over Na<sub>2</sub>SO<sub>4</sub>, and then concentrated under reduced pressure. Purification of the residue by flash chromatography on silica gel was purified afforded the indole product.<sup>1</sup>

a) <sup>1</sup>H NMR and <sup>13</sup>C NMR of *d3-1a*:

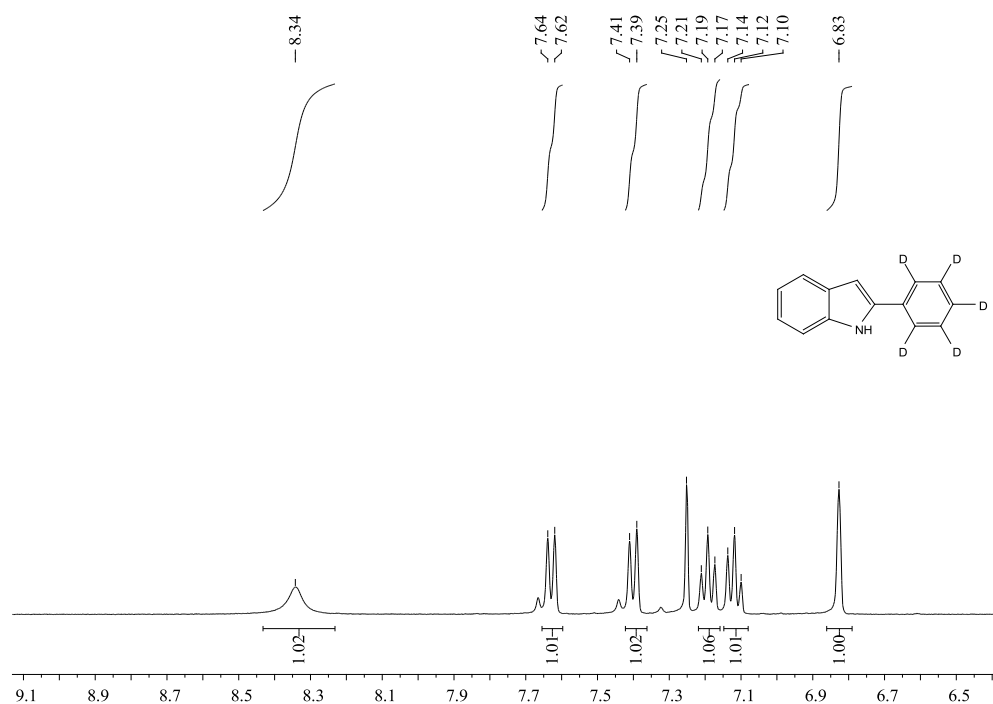

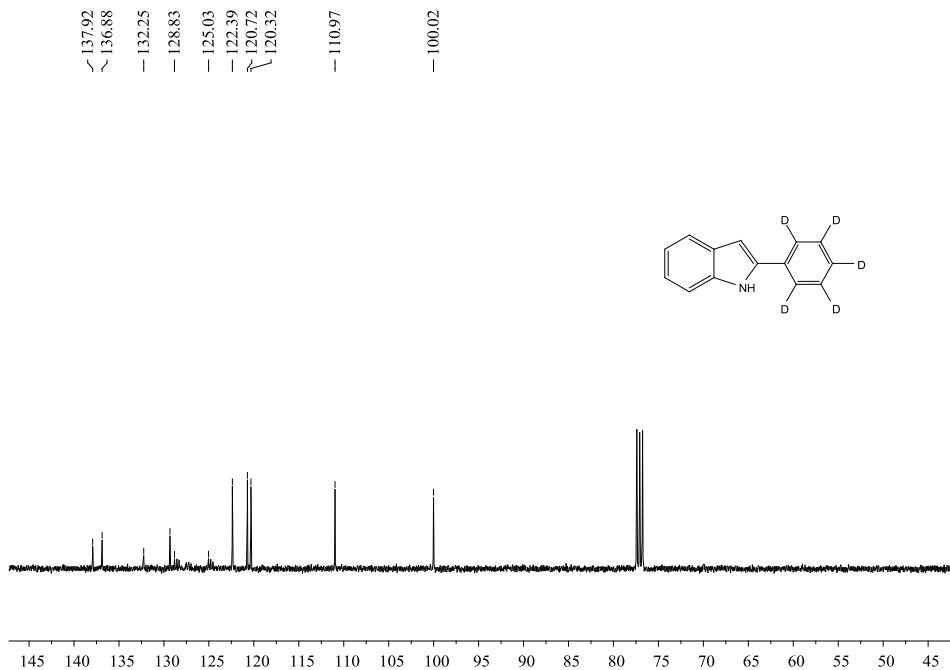

Deuterated-2-phenylindole ( $d_3$ -**1a**):  $^1\text{H}$  Gray solid; 29.3 mg, 74 % yield.  $^1\text{H}$  NMR (400 MHz,  $\text{CDCl}_3$ )  $\delta$  8.34 (s, 1H), 7.63 (d,  $J = 7.8$  Hz, 1H), 7.40 (d,  $J = 8.0$  Hz, 1H), 7.19 (t,  $J = 7.6$  Hz, 1H), 7.12 (t,  $J = 7.4$  Hz, 1H), 6.83 (s, 1H);  $^{13}\text{C}$  NMR (100 MHz,  $\text{CDCl}_3$ )  $\delta$  137.9, 136.8, 132.2, 129.3, 128.8, 125.0, 122.3, 120.7, 120.3, 110.9, 100.0.

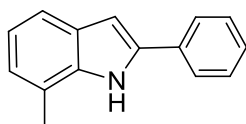

**2k**

The compound (**2k**) was prepared according to the above-mentioned procedure. <sup>1</sup> The product was obtained as yellow oil in 74 % yield.  $^1\text{H}$  NMR (400 MHz,  $\text{CDCl}_3$ )  $\delta$  8.16 (s, 1H), 7.66 (d,  $J = 7.7$  Hz, 2H), 7.51 – 7.37 (m, 3H), 7.30 (t,  $J = 7.3$  Hz, 1H), 7.08 – 6.94 (m, 2H), 6.82 (s, 1H), 2.52 (s, 1H);  $^{13}\text{C}$  NMR (100 MHz,  $\text{CDCl}_3$ )  $\delta$  137.6, 136.4, 132.5, 129.0, 128.8, 127.7, 125.2, 123.0, 120.5, 120.1, 118.4, 100.6, 16.7.

b) The procedure of the competitive experiment



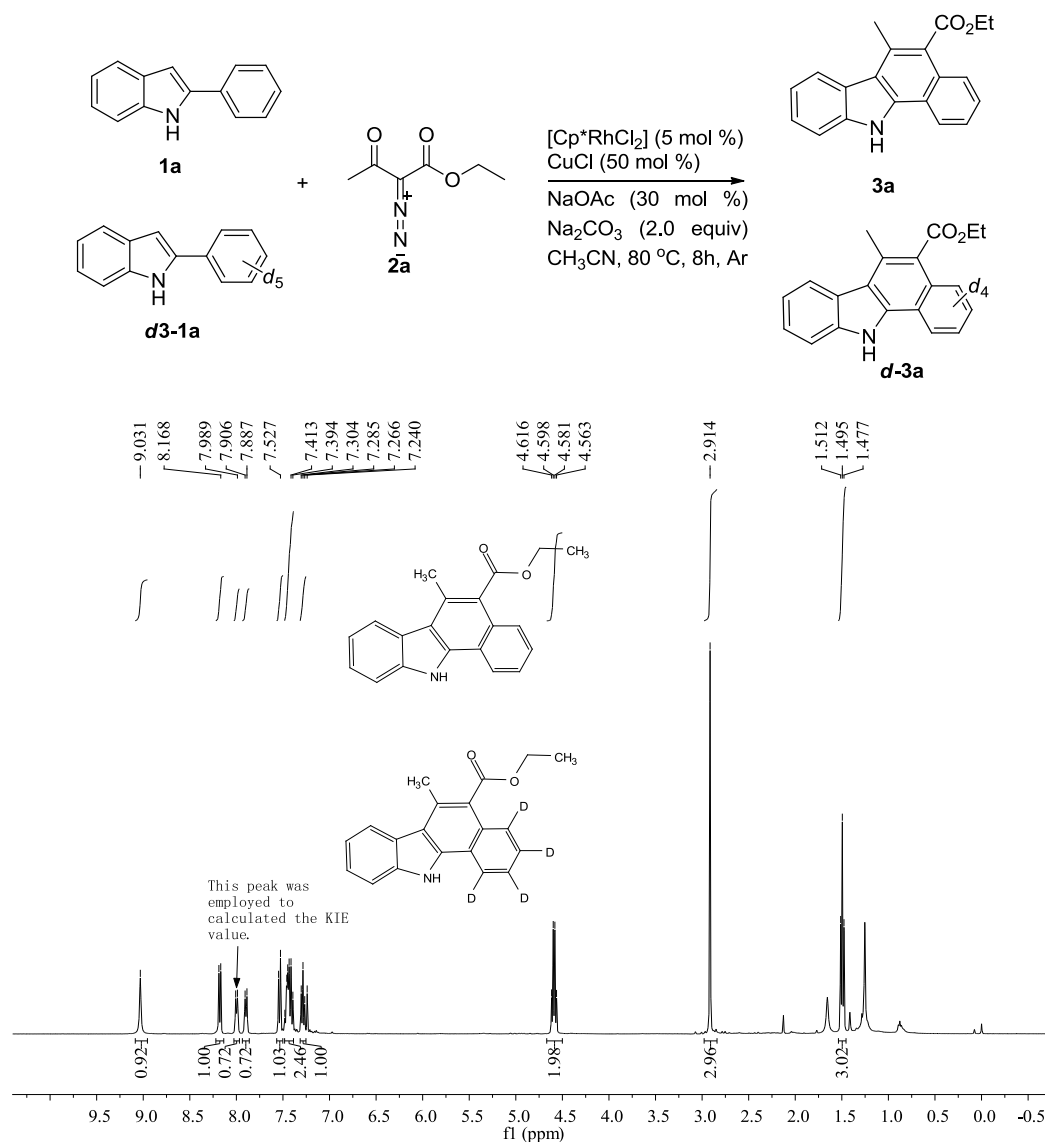

Competitive experiment: To a screw capped vial with a spinvane triangular-shaped Teflon stir bar were added 2-phenylindol **1a** (19.3mg, 0.1 mmol) and **d3-1a** (94% D): 19.8 mg, 0.1 mmol), diazo compound **2a** (62.4 mg, 0.4 mmol),  $[\text{RhCp}^*\text{Cl}_2]_2$  (6.0 mg, 0.01 mmol, 5 mol %), NaOAc (5 mg, 0.06 mmol, 30 mol %),  $\text{Na}_2\text{CO}_3$  (42.4mg, 0.4 mmol, 200 mol %), and dry  $\text{CH}_3\text{CN}$  (2.0 mL) under Ar atmosphere conditions. The reaction mixture was stirred at 80 °C for 8 h, and then was cooled to room temperature. Organic solvents were removed under reduced pressure and the residue was purified by chromatography on silica gel (*n*-hexane/EtOAc) to give the desired product. Yellow solid; 47.2 mg, 78% yield;  $^1\text{H}$  NMR (400 MHz,  $\text{CDCl}_3$ )  $\delta$  9.03 (s, 1H), 8.18 (d,  $J$  = 8.0 Hz, 1H), 8.00 (d,  $J$  = 7.6 Hz, 1H), 7.90 (d,  $J$  = 7.9 Hz, 1H), 7.54 (d,  $J$  = 8.1 Hz, 1H), 7.44 (dq,  $J$  = 16.1, 8.1 Hz, 2H), 7.28 (t,  $J$  = 7.5 Hz, 1H), 4.59 (q,  $J$  = 7.1 Hz, 2H), 2.91 (s, 3H), 1.49 (t,  $J$  = 7.1 Hz, 3H). The reaction progress in the early stage (8 hours) indicated a kinetic isotope

effect (KIE) of 2.7.

## 6. Photophysical data of the representative derivatives

UV-vis absorption spectra were recorded on a UV-2450 spectrophotometer. Photoluminescence (PL) spectra were measured using a Jobin-Yvon spectrofluorometer. Photoluminescence quantum yields (PLQYs) were measured on a HAMAMATSU absolute PL quantum yield spectrometer C11347 in solutions or films. Transient PL spectra were measured with an Edinburgh FL920 fluorescence spectrophotometer.

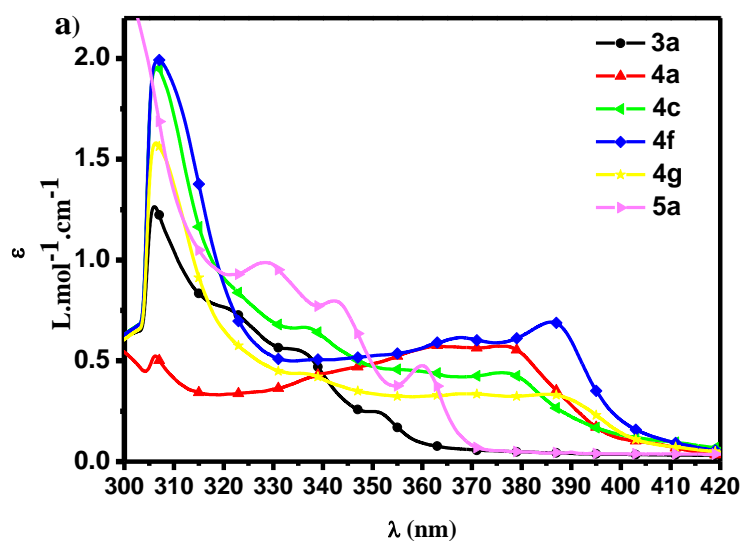

**Figure S4.** UV-vis absorption spectra of the compounds **3a**, **4a**, **4c**, **4f**, **4g**, and **5a** in dichloromethane solutions ( $10^{-5}$  M).

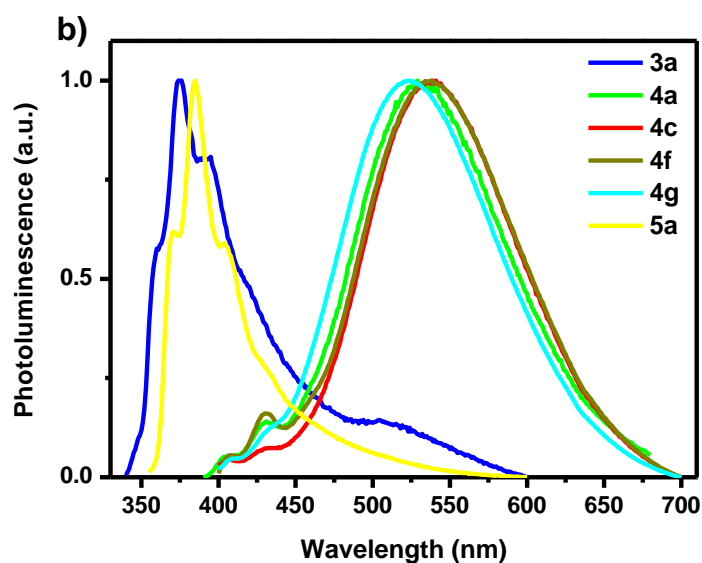

**Figure S5.** Photoluminescence spectra of the compounds **3a**, **4a**, **4c**, **4f**, **4g**, and **5a** in dichloromethane solutions ( $10^{-5}$  M).

dichloromethane solutions ( $10^{-5}$  M).

c)

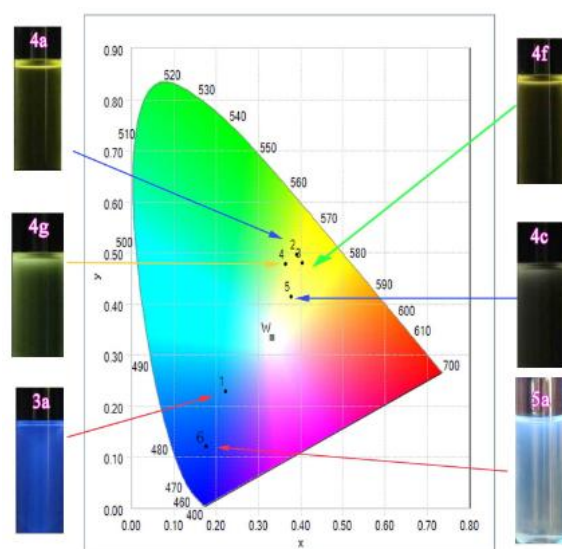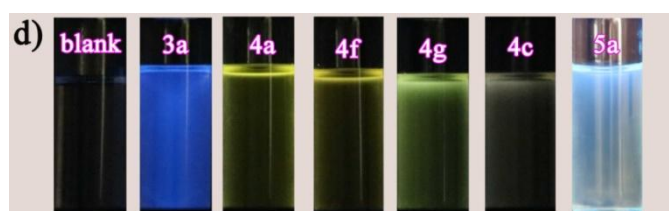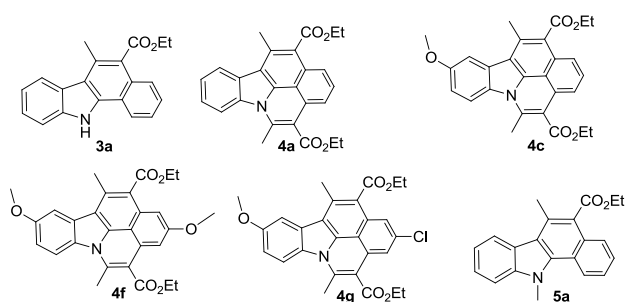

**Figure S6** CIE diagrams for emission color change of **3a**, **4a**, **4c**, **4f**, **4g** and **5a** in dichloromethane upon excitation at 365 nm ( $10^{-5}$  M). (c) Observed fluorescence under UV excitation (365 nm) (d).

**Table S1** Spectral properties of representative derivatives in DCM

| Comp.     | $\lambda_{\text{abs}}$<br>(nm) | $\lambda_{\text{em}}$<br>(nm) | $\epsilon$<br>( $\text{M}^{-1} \cdot \text{cm}^{-1}$ ) | $\tau$<br>(ns) | $\Phi$ | $k_r$<br>( $10^5 \text{s}^{-1}$ ) | $k_{nr}$<br>( $10^7 \text{s}^{-1}$ ) |
|-----------|--------------------------------|-------------------------------|--------------------------------------------------------|----------------|--------|-----------------------------------|--------------------------------------|
| <b>3a</b> | 351                            | 374                           | 24842                                                  | 1.600          | 0.012  | 75                                | 61.75                                |
| <b>4a</b> | 378                            | 530                           | 57224                                                  | 2.794          | 0.058  | 207                               | 33.72                                |
| <b>4c</b> | 375                            | 539                           | 44274                                                  | 2.423          | 0.048  | 198                               | 39.29                                |

|           |     |     |       |                |       |     |       |
|-----------|-----|-----|-------|----------------|-------|-----|-------|
| <b>4f</b> | 387 | 536 | 70573 | 3.647          | 0.096 | 263 | 24.79 |
| <b>4g</b> | 389 | 521 | 32505 | 2.411          | 0.066 | 273 | 38.74 |
| <b>5a</b> | 361 | 386 | 46472 | - <sup>a</sup> | 0.081 | -   | -     |

RT measurements in DCM ( $10^{-5}$  M). <sup>a</sup> The lifetime of **5a** is shorter than the instrument.

## 7. Single crystal data about **3a**

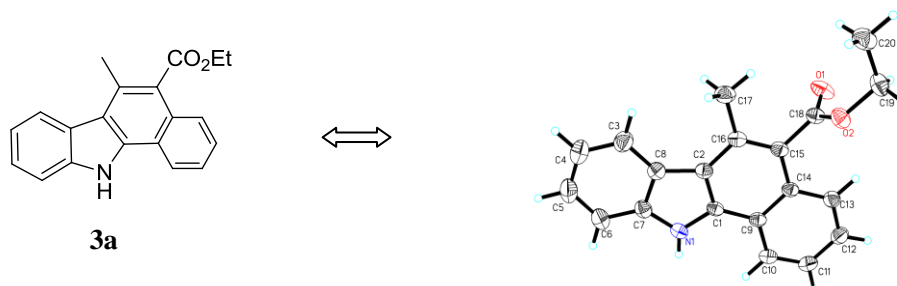

**Figure S7.** The single crystal structure of **3a** (The ellipsoid contour probability level is 30%)

**Table S2. Crystal data and structure refinement for **3a****

|                             |                                                                                                                        |
|-----------------------------|------------------------------------------------------------------------------------------------------------------------|
| Identification code         | 3a                                                                                                                     |
| Empirical formula           | C <sub>20</sub> H <sub>17</sub> NO <sub>2</sub>                                                                        |
| Formula weight              | 303.35                                                                                                                 |
| Temperature                 | 293(2) K                                                                                                               |
| Wavelength                  | 1.54178 Å                                                                                                              |
| Crystal system, space group | Monoclinic, P21/c                                                                                                      |
| Unit cell dimensions        | a = 10.3910(4) Å    alpha = 90 deg.<br>b = 17.2188(6) Å    beta = 98.489(4) deg.<br>c = 8.7009(3) Å    gamma = 90 deg. |
| Volume                      | 1539.71(10) Å <sup>3</sup>                                                                                             |
| Z, Calculated density       | 4, 1.309 Mg/m <sup>3</sup>                                                                                             |
| Absorption coefficient      | 0.673 mm <sup>-1</sup>                                                                                                 |
| F(000)                      | 640                                                                                                                    |
| Crystal size                | 0.2 x 0.18 x 0.11 mm                                                                                                   |

|                                   |                                             |
|-----------------------------------|---------------------------------------------|
| Theta range for data collection   | 6.71 to 62.79 deg.                          |
| Limiting indices                  | -11<=h<=11, -19<=k<=19, -6<=l<=9            |
| Reflections collected / unique    | 5497 / 2438 [R(int) = 0.0195]               |
| Completeness to theta = 62.79     | 98.9 %                                      |
| Refinement method                 | Full-matrix least-squares on F <sup>2</sup> |
| Data / restraints / parameters    | 2438 / 0 / 272                              |
| Goodness-of-fit on F <sup>2</sup> | 1.020                                       |
| Final R indices [I>2sigma(I)]     | R1 = 0.0388, wR2 = 0.1190                   |
| R indices (all data)              | R1 = 0.0450, wR2 = 0.1278                   |
| Largest diff. peak and hole       | 0.121 and -0.150 e.A <sup>-3</sup>          |

**Table S3. Atomic coordinates (  $\times 10^4$ ) and equivalent isotropic displacement parameters ( $\text{\AA}^2 \times 10^3$ ) for 3a. U(eq) is defined as one third of the trace of the orthogonalized**

**Uij tensor.**

|       | x        | y       | z       | U(eq) |
|-------|----------|---------|---------|-------|
| N(1)  | 8390(1)  | 4918(1) | 7530(1) | 48(1) |
| O(1)  | 9024(1)  | 5716(1) | 634(1)  | 70(1) |
| O(2)  | 7721(1)  | 6686(1) | 1102(1) | 57(1) |
| C(1)  | 8477(1)  | 5289(1) | 6158(1) | 41(1) |
| C(2)  | 7502(1)  | 5016(1) | 5006(2) | 44(1) |
| C(3)  | 5722(2)  | 3958(1) | 5259(2) | 65(1) |
| C(4)  | 5327(2)  | 3439(1) | 6299(3) | 80(1) |
| C(5)  | 5951(2)  | 3395(1) | 7823(3) | 78(1) |
| C(6)  | 6982(2)  | 3871(1) | 8354(2) | 65(1) |
| C(7)  | 7381(1)  | 4394(1) | 7304(2) | 50(1) |
| C(8)  | 6781(1)  | 4444(1) | 5749(2) | 49(1) |
| C(9)  | 9400(1)  | 5858(1) | 5876(2) | 42(1) |
| C(10) | 10360(1) | 6160(1) | 7036(2) | 50(1) |

|       |          |         |          |       |
|-------|----------|---------|----------|-------|
| C(11) | 11222(2) | 6699(1) | 6669(2)  | 56(1) |
| C(12) | 11174(2) | 6955(1) | 5144(2)  | 56(1) |
| C(13) | 10248(1) | 6675(1) | 3995(2)  | 50(1) |
| C(14) | 9333(1)  | 6118(1) | 4319(1)  | 42(1) |
| C(15) | 8357(1)  | 5809(1) | 3138(2)  | 44(1) |
| C(16) | 7440(1)  | 5279(1) | 3451(2)  | 46(1) |
| C(17) | 6423(2)  | 4964(1) | 2207(2)  | 60(1) |
| C(18) | 8410(1)  | 6050(1) | 1500(2)  | 47(1) |
| C(19) | 7702(2)  | 6978(1) | -485(2)  | 65(1) |
| C(20) | 6632(2)  | 6614(1) | -1562(2) | 75(1) |

**Table S4. Bond lengths [Å] and angles [deg] for 3a.**

| Bond       | Lengths [Å] |
|------------|-------------|
| N(1)-C(1)  | 1.3683(17)  |
| N(1)-C(7)  | 1.3751(18)  |
| N(1)-H(3A) | 0.8600      |
| O(1)-C(18) | 1.2040(17)  |
| O(2)-C(18) | 1.3255(16)  |
| O(2)-C(19) | 1.4672(19)  |
| C(1)-C(2)  | 1.3975(18)  |
| C(1)-C(9)  | 1.4176(19)  |
| C(2)-C(16) | 1.4197(19)  |
| C(2)-C(8)  | 1.447(2)    |
| C(3)-C(4)  | 1.376(3)    |
| C(3)-C(8)  | 1.398(2)    |
| C(3)-H(21) | 1.00(2)     |
| C(4)-C(5)  | 1.390(3)    |
| C(4)-H(23) | 0.99(2)     |
| C(5)-C(6)  | 1.373(3)    |

|                 |            |
|-----------------|------------|
| C(5)-H(22)      | 0.98(2)    |
| C(6)-C(7)       | 1.389(2)   |
| C(6)-H(15)      | 1.003(18)  |
| C(7)-C(8)       | 1.405(2)   |
| C(9)-C(10)      | 1.4103(19) |
| C(9)-C(14)      | 1.4192(19) |
| C(10)-C(11)     | 1.360(2)   |
| C(10)-H(13)     | 1.002(17)  |
| C(11)-C(12)     | 1.392(2)   |
| C(11)-H(18)     | 1.014(16)  |
| C(12)-C(13)     | 1.369(2)   |
| C(12)-H(17)     | 0.98(2)    |
| C(13)-C(14)     | 1.407(2)   |
| C(13)-H(9)      | 0.976(16)  |
| C(14)-C(15)     | 1.4359(18) |
| C(15)-C(16)     | 1.374(2)   |
| C(15)-C(18)     | 1.492(2)   |
| C(16)-C(17)     | 1.498(2)   |
| C(17)-H(19A)    | 0.96(2)    |
| C(17)-H(19B)    | 0.96(2)    |
| C(17)-H(19C)    | 0.97(2)    |
| C(19)-C(20)     | 1.483(3)   |
| C(19)-H(20A)    | 0.984(19)  |
| C(19)-H(20B)    | 1.05(2)    |
| C(20)-H(16A)    | 0.97(2)    |
| C(20)-H(16B)    | 1.02(2)    |
| C(20)-H(16C)    | 1.00(2)    |
| C(1)-N(1)-C(7)  | 109.18(11) |
| C(1)-N(1)-H(3A) | 125.4      |

---



|                  |            |
|------------------|------------|
| C(7)-N(1)-H(3A)  | 125.4      |
| C(18)-O(2)-C(19) | 117.50(12) |
| N(1)-C(1)-C(2)   | 109.54(12) |
| N(1)-C(1)-C(9)   | 127.39(11) |
| C(2)-C(1)-C(9)   | 123.06(12) |
| C(1)-C(2)-C(16)  | 120.16(12) |
| C(1)-C(2)-C(8)   | 106.05(12) |
| C(16)-C(2)-C(8)  | 133.66(13) |
| C(4)-C(3)-C(8)   | 119.06(19) |
| C(4)-C(3)-H(21)  | 120.7(11)  |
| C(8)-C(3)-H(21)  | 120.3(11)  |
| C(3)-C(4)-C(5)   | 121.34(19) |
| C(3)-C(4)-H(23)  | 117.6(12)  |
| C(5)-C(4)-H(23)  | 121.0(11)  |
| C(6)-C(5)-C(4)   | 121.27(17) |
| C(6)-C(5)-H(22)  | 117.3(12)  |
| C(4)-C(5)-H(22)  | 121.3(12)  |
| C(5)-C(6)-C(7)   | 117.35(18) |
| C(5)-C(6)-H(15)  | 122.0(10)  |
| C(7)-C(6)-H(15)  | 120.6(10)  |
| N(1)-C(7)-C(6)   | 128.78(15) |
| N(1)-C(7)-C(8)   | 108.55(12) |
| C(6)-C(7)-C(8)   | 122.65(15) |
| C(3)-C(8)-C(7)   | 118.31(14) |
| C(3)-C(8)-C(2)   | 135.01(15) |
| C(7)-C(8)-C(2)   | 106.66(12) |
| C(10)-C(9)-C(1)  | 123.81(12) |
| C(10)-C(9)-C(14) | 119.78(13) |
| C(1)-C(9)-C(14)  | 116.41(11) |

|                     |            |
|---------------------|------------|
| C(11)-C(10)-C(9)    | 120.30(14) |
| C(11)-C(10)-H(13)   | 120.4(9)   |
| C(9)-C(10)-H(13)    | 119.3(9)   |
| C(10)-C(11)-C(12)   | 120.54(14) |
| C(10)-C(11)-H(18)   | 118.5(9)   |
| C(12)-C(11)-H(18)   | 120.9(9)   |
| C(13)-C(12)-C(11)   | 120.44(15) |
| C(13)-C(12)-H(17)   | 119.4(11)  |
| C(11)-C(12)-H(17)   | 120.2(11)  |
| C(12)-C(13)-C(14)   | 121.11(14) |
| C(12)-C(13)-H(9)    | 118.6(9)   |
| C(14)-C(13)-H(9)    | 120.3(9)   |
| C(13)-C(14)-C(9)    | 117.83(12) |
| C(13)-C(14)-C(15)   | 122.43(12) |
| C(9)-C(14)-C(15)    | 119.74(12) |
| C(16)-C(15)-C(14)   | 122.77(12) |
| C(16)-C(15)-C(18)   | 119.86(12) |
| C(14)-C(15)-C(18)   | 117.27(12) |
| C(15)-C(16)-C(2)    | 117.76(12) |
| C(15)-C(16)-C(17)   | 122.20(13) |
| C(2)-C(16)-C(17)    | 120.02(13) |
| C(16)-C(17)-H(19A)  | 115.6(12)  |
| C(16)-C(17)-H(19B)  | 112.6(13)  |
| H(19A)-C(17)-H(19B) | 107.6(18)  |
| C(16)-C(17)-H(19C)  | 110.9(13)  |
| H(19A)-C(17)-H(19C) | 105.7(17)  |
| H(19B)-C(17)-H(19C) | 104(2)     |
| O(1)-C(18)-O(2)     | 123.16(13) |
| O(1)-C(18)-C(15)    | 124.23(12) |

---

|                     |            |
|---------------------|------------|
| O(2)-C(18)-C(15)    | 112.60(11) |
| O(2)-C(19)-C(20)    | 110.75(15) |
| O(2)-C(19)-H(20A)   | 107.8(11)  |
| C(20)-C(19)-H(20A)  | 111.8(11)  |
| O(2)-C(19)-H(20B)   | 100.2(11)  |
| C(20)-C(19)-H(20B)  | 112.2(11)  |
| H(20A)-C(19)-H(20B) | 113.4(16)  |
| C(19)-C(20)-H(16A)  | 111.7(14)  |
| C(19)-C(20)-H(16B)  | 109.3(13)  |
| H(16A)-C(20)-H(16B) | 109(2)     |
| C(19)-C(20)-H(16C)  | 111.5(13)  |
| H(16A)-C(20)-H(16C) | 106(2)     |
| H(16B)-C(20)-H(16C) | 108.9(17)  |

**Table S5. Anisotropic displacement parameters for shelxl.**

|      | U11   | U22   | U33   | U23   | U13   | U12    |
|------|-------|-------|-------|-------|-------|--------|
| N(1) | 53(1) | 56(1) | 36(1) | -1(1) | 6(1)  | 3(1)   |
| O(1) | 81(1) | 88(1) | 41(1) | 0(1)  | 12(1) | 31(1)  |
| O(2) | 63(1) | 58(1) | 50(1) | 9(1)  | 9(1)  | 11(1)  |
| C(1) | 43(1) | 45(1) | 36(1) | -4(1) | 7(1)  | 6(1)   |
| C(2) | 42(1) | 48(1) | 42(1) | -5(1) | 7(1)  | 5(1)   |
| C(3) | 56(1) | 66(1) | 74(1) | -3(1) | 10(1) | -10(1) |
| C(4) | 72(1) | 74(1) | 97(2) | 4(1)  | 18(1) | -19(1) |
| C(5) | 83(1) | 66(1) | 90(1) | 16(1) | 32(1) | -7(1)  |
| C(6) | 70(1) | 65(1) | 64(1) | 10(1) | 22(1) | 6(1)   |
| C(7) | 51(1) | 50(1) | 51(1) | 1(1)  | 15(1) | 7(1)   |
| C(8) | 46(1) | 49(1) | 53(1) | -2(1) | 10(1) | 5(1)   |
| C(9) | 44(1) | 44(1) | 39(1) | -7(1) | 6(1)  | 8(1)   |

|       |       |       |       |        |       |       |
|-------|-------|-------|-------|--------|-------|-------|
| C(10) | 52(1) | 56(1) | 40(1) | -9(1)  | 4(1)  | 2(1)  |
| C(11) | 54(1) | 58(1) | 54(1) | -15(1) | 2(1)  | -3(1) |
| C(12) | 57(1) | 52(1) | 61(1) | -8(1)  | 10(1) | -6(1) |
| C(13) | 55(1) | 48(1) | 48(1) | -1(1)  | 10(1) | 2(1)  |
| C(14) | 45(1) | 41(1) | 39(1) | -4(1)  | 7(1)  | 7(1)  |
| C(15) | 47(1) | 46(1) | 38(1) | -3(1)  | 5(1)  | 8(1)  |
| C(16) | 44(1) | 50(1) | 42(1) | -6(1)  | 2(1)  | 6(1)  |
| C(17) | 57(1) | 73(1) | 48(1) | -6(1)  | -3(1) | -6(1) |
| C(18) | 47(1) | 53(1) | 40(1) | -3(1)  | 2(1)  | 6(1)  |
| C(19) | 65(1) | 70(1) | 59(1) | 19(1)  | 8(1)  | 4(1)  |
| C(20) | 82(1) | 78(1) | 60(1) | 5(1)   | -3(1) | 16(1) |

**Table S6. Hydrogen coordinates and isotropic displacement parameters for shelxl.**

|        | x         | y        | z         | U(eq)  |
|--------|-----------|----------|-----------|--------|
| H(3A)  | 8888      | 4999     | 8395      | 58     |
| H(21)  | 5270(19)  | 3983(10) | 4170(20)  | 73(5)  |
| H(23)  | 4560(20)  | 3114(12) | 5930(20)  | 84(6)  |
| H(22)  | 5646(19)  | 3041(12) | 8580(20)  | 82(5)  |
| H(15)  | 7420(16)  | 3858(9)  | 9460(20)  | 63(4)  |
| H(13)  | 10400(15) | 5974(9)  | 8130(20)  | 57(4)  |
| H(18)  | 11923(16) | 6891(9)  | 7520(18)  | 60(4)  |
| H(17)  | 11820(19) | 7329(11) | 4880(20)  | 74(5)  |
| H(9)   | 10248(14) | 6858(9)  | 2933(19)  | 55(4)  |
| H(19A) | 6443(19)  | 5166(12) | 1180(30)  | 90(6)  |
| H(19B) | 5560(20)  | 5035(13) | 2440(20)  | 96(7)  |
| H(19C) | 6500(20)  | 4403(13) | 2120(20)  | 86(6)  |
| H(20A) | 8557(19)  | 6872(10) | -790(20)  | 75(5)  |
| H(20B) | 7534(19)  | 7572(12) | -310(20)  | 83(6)  |
| H(16A) | 5790(20)  | 6678(14) | -1200(30) | 102(7) |

|        |          |          |           |        |
|--------|----------|----------|-----------|--------|
| H(16B) | 6820(20) | 6037(14) | -1660(30) | 100(7) |
| H(16C) | 6540(20) | 6855(13) | -2620(30) | 102(7) |

**Table S7. Bond angles [deg] for shelxl.**

| Bond                 | Bond angles [deg] |
|----------------------|-------------------|
| C(7)-N(1)-C(1)-C(2)  | 0.67(14)          |
| C(7)-N(1)-C(1)-C(9)  | -178.50(12)       |
| N(1)-C(1)-C(2)-C(16) | -176.10(11)       |
| C(9)-C(1)-C(2)-C(16) | 3.12(19)          |
| N(1)-C(1)-C(2)-C(8)  | 0.32(14)          |
| C(9)-C(1)-C(2)-C(8)  | 179.54(11)        |
| C(8)-C(3)-C(4)-C(5)  | 0.6(3)            |
| C(3)-C(4)-C(5)-C(6)  | 0.4(3)            |
| C(4)-C(5)-C(6)-C(7)  | -0.5(3)           |
| C(1)-N(1)-C(7)-C(6)  | 176.90(14)        |
| C(1)-N(1)-C(7)-C(8)  | -1.42(14)         |
| C(5)-C(6)-C(7)-N(1)  | -178.61(14)       |
| C(5)-C(6)-C(7)-C(8)  | -0.5(2)           |
| C(4)-C(3)-C(8)-C(7)  | -1.5(2)           |
| C(4)-C(3)-C(8)-C(2)  | 176.28(16)        |
| N(1)-C(7)-C(8)-C(3)  | 179.93(13)        |
| C(6)-C(7)-C(8)-C(3)  | 1.5(2)            |
| N(1)-C(7)-C(8)-C(2)  | 1.59(14)          |
| C(6)-C(7)-C(8)-C(2)  | -176.86(13)       |
| C(1)-C(2)-C(8)-C(3)  | -179.10(16)       |
| C(16)-C(2)-C(8)-C(3) | -3.4(3)           |
| C(1)-C(2)-C(8)-C(7)  | -1.16(14)         |
| C(16)-C(2)-C(8)-C(7) | 174.56(14)        |
| N(1)-C(1)-C(9)-C(10) | -3.2(2)           |

|                         |             |
|-------------------------|-------------|
| C(2)-C(1)-C(9)-C(10)    | 177.68(12)  |
| N(1)-C(1)-C(9)-C(14)    | 175.96(11)  |
| C(2)-C(1)-C(9)-C(14)    | -3.11(18)   |
| C(1)-C(9)-C(10)-C(11)   | 179.16(12)  |
| C(14)-C(9)-C(10)-C(11)  | 0.0(2)      |
| C(9)-C(10)-C(11)-C(12)  | -0.4(2)     |
| C(10)-C(11)-C(12)-C(13) | 0.7(2)      |
| C(11)-C(12)-C(13)-C(14) | -0.6(2)     |
| C(12)-C(13)-C(14)-C(9)  | 0.11(19)    |
| C(12)-C(13)-C(14)-C(15) | -179.57(13) |
| C(10)-C(9)-C(14)-C(13)  | 0.19(18)    |
| C(1)-C(9)-C(14)-C(13)   | -179.06(11) |
| C(10)-C(9)-C(14)-C(15)  | 179.87(11)  |
| C(1)-C(9)-C(14)-C(15)   | 0.62(17)    |
| C(13)-C(14)-C(15)-C(16) | -178.42(12) |
| C(9)-C(14)-C(15)-C(16)  | 1.91(19)    |
| C(13)-C(14)-C(15)-C(18) | 5.08(18)    |
| C(9)-C(14)-C(15)-C(18)  | -174.59(11) |
| C(14)-C(15)-C(16)-C(2)  | -1.97(19)   |
| C(18)-C(15)-C(16)-C(2)  | 174.44(11)  |
| C(14)-C(15)-C(16)-C(17) | 179.71(13)  |
| C(18)-C(15)-C(16)-C(17) | -3.9(2)     |
| C(1)-C(2)-C(16)-C(15)   | -0.48(19)   |
| C(8)-C(2)-C(16)-C(15)   | -175.72(13) |
| C(1)-C(2)-C(16)-C(17)   | 177.87(12)  |
| C(8)-C(2)-C(16)-C(17)   | 2.6(2)      |
| C(19)-O(2)-C(18)-O(1)   | 1.1(2)      |
| C(19)-O(2)-C(18)-C(15)  | 179.96(12)  |
| C(16)-C(15)-C(18)-O(1)  | -87.88(19)  |

|                        |            |
|------------------------|------------|
| C(14)-C(15)-C(18)-O(1) | 88.72(17)  |
| C(16)-C(15)-C(18)-O(2) | 93.24(15)  |
| C(14)-C(15)-C(18)-O(2) | -90.15(15) |
| C(18)-O(2)-C(19)-C(20) | 88.46(18)  |

### 8. Single crystal data about 4e

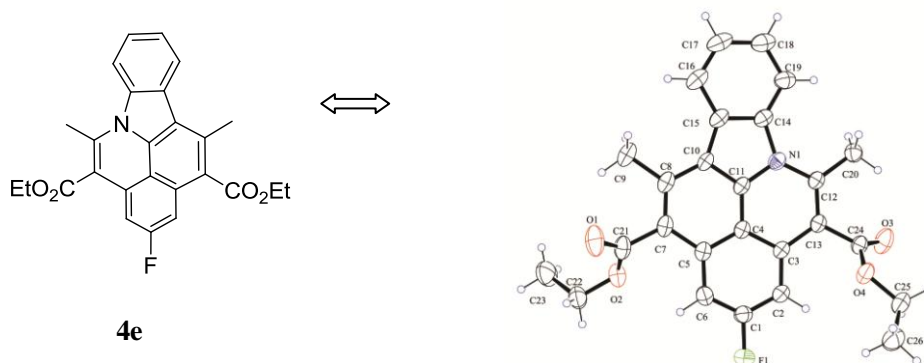

**Figure S8.** The single crystal structure of **4e** (The ellipsoid contour probability level is 30%)

**Table S8.** Crystal data and structure refinement for **4e**

|                             |                                                  |                         |
|-----------------------------|--------------------------------------------------|-------------------------|
| Identification code         | 4e                                               |                         |
| Empirical formula           | C <sub>26</sub> H <sub>22</sub> FNO <sub>4</sub> |                         |
| Formula weight              | 431.45                                           |                         |
| Temperature                 | 571(2) K                                         |                         |
| Wavelength                  | 1.54184 Å                                        |                         |
| Crystal system, space group | Triclinic, P-1                                   |                         |
| Unit cell dimensions        | a = 12.2335(5) Å                                 | alpha = 95.978(3) deg.  |
|                             | b = 13.0790(6) Å                                 | beta = 106.554(4) deg.  |
|                             | c = 14.4423(5) Å                                 | gamma = 105.092(4) deg. |
| Volume                      | 2098.56(15) Å <sup>3</sup>                       |                         |
| Z, Calculated density       | 4, 1.366 Mg/m <sup>3</sup>                       |                         |
| Absorption coefficient      | 0.808 mm <sup>-1</sup>                           |                         |
| F(000)                      | 904                                              |                         |
| Crystal size                | 0.30 x 0.25 x 0.20 mm                            |                         |

|                                   |                                             |
|-----------------------------------|---------------------------------------------|
| Theta range for data collection   | 3.25 to 62.84 deg.                          |
| Limiting indices                  | -14<=h<=14, -15<=k<=14, -10<=l<=16          |
| Reflections collected / unique    | 18225 / 6724 [R(int) = 0.0211]              |
| Completeness to theta = 62.84     | 99.5 %                                      |
| Max. and min. transmission        | 0.8551 and 0.7936                           |
| Refinement method                 | Full-matrix least-squares on F <sup>2</sup> |
| Data / restraints / parameters    | 6724 / 0 / 577                              |
| Goodness-of-fit on F <sup>2</sup> | 1.057                                       |
| Final R indices [I>2sigma(I)]     | R1 = 0.0631, wR2 = 0.1835                   |
| R indices (all data)              | R1 = 0.0720, wR2 = 0.1957                   |
| Largest diff. peak and hole       | 0.778 and -0.325 e.A <sup>-3</sup>          |

**Table S9. Atomic coordinates ( x 10<sup>4</sup>) and equivalent isotropic displacement parameters (A<sup>2</sup> x 10<sup>3</sup>) for 3a. U(eq) is defined as one third of the trace of the orthogonalized**

**Uij tensor.**

|      | x        | y        | z       | U(eq) |
|------|----------|----------|---------|-------|
| O(1) | 6816(3)  | -2841(2) | -139(2) | 96(1) |
| O(2) | 6337(2)  | -2077(2) | 1073(2) | 72(1) |
| O(3) | 10647(2) | 4637(2)  | 2321(2) | 89(1) |
| O(4) | 9362(2)  | 3974(1)  | 817(1)  | 67(1) |
| O(5) | 14479(2) | 3344(2)  | 4324(2) | 86(1) |
| O(6) | 14699(2) | 2631(2)  | 5659(2) | 88(1) |
| O(7) | 6832(2)  | 1706(2)  | 4225(2) | 77(1) |
| O(8) | 7398(2)  | 2739(2)  | 3213(1) | 62(1) |
| F(1) | 5825(1)  | 1419(1)  | 729(2)  | 81(1) |
| F(2) | 11403(2) | 5176(1)  | 4636(1) | 77(1) |
| N(1) | 11196(2) | 1449(2)  | 1673(2) | 53(1) |
| N(2) | 11304(2) | 295(2)   | 3975(2) | 60(1) |



|       |          |          |         |        |
|-------|----------|----------|---------|--------|
| C(1)  | 6894(2)  | 1213(2)  | 904(2)  | 56(1)  |
| C(2)  | 7898(2)  | 2095(2)  | 1185(2) | 53(1)  |
| C(3)  | 9010(2)  | 1924(2)  | 1346(2) | 45(1)  |
| C(4)  | 9015(2)  | 837(2)   | 1228(2) | 45(1)  |
| C(5)  | 7968(2)  | -62(2)   | 943(2)  | 49(1)  |
| C(6)  | 6876(2)  | 160(2)   | 772(2)  | 58(1)  |
| C(7)  | 8115(3)  | -1128(2) | 822(2)  | 54(1)  |
| C(8)  | 9222(3)  | -1279(2) | 972(2)  | 55(1)  |
| C(9)  | 9411(3)  | -2368(2) | 900(2)  | 73(1)  |
| C(10) | 10244(2) | -371(2)  | 1250(2) | 46(1)  |
| C(11) | 10109(2) | 646(2)   | 1382(2) | 46(1)  |
| C(12) | 11224(2) | 2535(2)  | 1811(2) | 47(1)  |
| C(13) | 10153(2) | 2760(2)  | 1630(2) | 47(1)  |
| C(14) | 12088(2) | 915(2)   | 1726(2) | 52(1)  |
| C(15) | 11498(3) | -209(2)  | 1462(2) | 55(1)  |
| C(16) | 12167(3) | -927(3)  | 1423(2) | 70(1)  |
| C(17) | 13374(3) | -515(3)  | 1646(2) | 81(1)  |
| C(18) | 13951(3) | 585(3)   | 1917(2) | 79(1)  |
| C(19) | 13317(3) | 1306(3)  | 1956(2) | 67(1)  |
| C(20) | 12412(2) | 3384(2)  | 2116(2) | 61(1)  |
| C(21) | 7042(3)  | -2100(2) | 520(2)  | 64(1)  |
| C(22) | 5272(3)  | -2983(3) | 838(3)  | 81(1)  |
| C(23) | 5512(4)  | -3854(3) | 1355(4) | 113(2) |
| C(24) | 10133(2) | 3895(2)  | 1669(2) | 52(1)  |
| C(25) | 9058(3)  | 4965(2)  | 779(3)  | 79(1)  |
| C(26) | 7972(4)  | 4727(3)  | -100(4) | 115(2) |
| C(27) | 11165(2) | 4085(2)  | 4464(2) | 56(1)  |
| C(28) | 12123(2) | 3694(2)  | 4571(2) | 56(1)  |
| C(29) | 11888(2) | 2573(2)  | 4382(2) | 50(1)  |

|       |          |          |         |        |
|-------|----------|----------|---------|--------|
| C(30) | 10680(2) | 1928(2)  | 4099(2) | 47(1)  |
| C(31) | 9708(2)  | 2352(2)  | 4010(2) | 47(1)  |
| C(32) | 9988(2)  | 3475(2)  | 4205(2) | 55(1)  |
| C(33) | 8527(2)  | 1583(2)  | 3764(2) | 49(1)  |
| C(34) | 8322(2)  | 485(2)   | 3585(2) | 50(1)  |
| C(35) | 7104(3)  | -324(2)  | 3278(2) | 64(1)  |
| C(36) | 9309(2)  | 94(2)    | 3660(1) | 42(1)  |
| C(37) | 10439(2) | 812(2)   | 3918(2) | 48(1)  |
| C(38) | 12527(2) | 930(2)   | 4256(2) | 54(1)  |
| C(39) | 13462(3) | 375(3)   | 4297(2) | 69(1)  |
| C(40) | 12791(2) | 2032(2)  | 4463(2) | 54(1)  |
| C(41) | 10677(3) | -832(2)  | 3738(2) | 54(1)  |
| C(42) | 9454(3)  | -960(2)  | 3551(2) | 54(1)  |
| C(43) | 8636(3)  | -1991(2) | 3329(2) | 69(1)  |
| C(44) | 9050(4)  | -2869(3) | 3293(2) | 79(1)  |
| C(45) | 10247(4) | -2749(3) | 3478(2) | 79(1)  |
| C(46) | 11074(3) | -1745(2) | 3698(2) | 68(1)  |
| C(47) | 14061(2) | 2734(2)  | 4783(2) | 62(1)  |
| C(48) | 15971(3) | 3256(5)  | 6026(3) | 115(2) |
| C(49) | 16539(5) | 3032(6)  | 6945(4) | 145(2) |
| C(50) | 7499(2)  | 1994(2)  | 3768(2) | 53(1)  |
| C(51) | 6496(3)  | 3261(3)  | 3259(3) | 74(1)  |
| C(52) | 6410(5)  | 3947(4)  | 2545(5) | 138(2) |

**Table S10. Bond lengths [Å] and angles [deg] for 3a.**

| Bond       | Lengths [Å] |
|------------|-------------|
| O(1)-C(21) | 1.200(3)    |
| O(2)-C(21) | 1.335(4)    |
| O(2)-C(22) | 1.441(4)    |

|            |          |
|------------|----------|
| O(3)-C(24) | 1.175(3) |
| O(4)-C(24) | 1.353(3) |
| O(4)-C(25) | 1.441(3) |
| O(5)-C(47) | 1.194(3) |
| O(6)-C(47) | 1.326(3) |
| O(6)-C(48) | 1.465(4) |
| O(7)-C(50) | 1.201(3) |
| O(8)-C(50) | 1.333(3) |
| O(8)-C(51) | 1.453(3) |
| F(1)-C(1)  | 1.362(3) |
| F(2)-C(27) | 1.360(3) |
| N(1)-C(11) | 1.382(3) |
| N(1)-C(12) | 1.404(3) |
| N(1)-C(14) | 1.430(3) |
| N(2)-C(37) | 1.385(3) |
| N(2)-C(38) | 1.425(4) |
| N(2)-C(41) | 1.426(4) |
| C(1)-C(6)  | 1.365(4) |
| C(1)-C(2)  | 1.373(4) |
| C(2)-C(3)  | 1.394(3) |
| C(2)-H(2A) | 0.9300   |
| C(3)-C(4)  | 1.415(3) |
| C(3)-C(13) | 1.450(3) |
| C(4)-C(11) | 1.385(3) |
| C(4)-C(5)  | 1.417(3) |
| C(5)-C(6)  | 1.399(4) |
| C(5)-C(7)  | 1.451(3) |
| C(6)-H(6A) | 0.9300   |
| C(7)-C(8)  | 1.378(4) |

---

|              |          |
|--------------|----------|
| C(7)-C(21)   | 1.490(4) |
| C(8)-C(10)   | 1.405(4) |
| C(8)-C(9)    | 1.499(4) |
| C(9)-H(9A)   | 0.9600   |
| C(9)-H(9B)   | 0.9600   |
| C(9)-H(9C)   | 0.9600   |
| C(10)-C(11)  | 1.384(3) |
| C(10)-C(15)  | 1.429(4) |
| C(12)-C(13)  | 1.376(3) |
| C(12)-C(20)  | 1.495(4) |
| C(13)-C(24)  | 1.486(3) |
| C(14)-C(19)  | 1.384(4) |
| C(14)-C(15)  | 1.415(4) |
| C(15)-C(16)  | 1.404(4) |
| C(16)-C(17)  | 1.361(5) |
| C(16)-H(16A) | 0.9300   |
| C(17)-C(18)  | 1.385(5) |
| C(17)-H(17A) | 0.9300   |
| C(18)-C(19)  | 1.374(4) |
| C(18)-H(18A) | 0.9300   |
| C(19)-H(19A) | 0.9300   |
| C(20)-H(20A) | 0.9600   |
| C(20)-H(20B) | 0.9600   |
| C(20)-H(20C) | 0.9600   |
| C(22)-C(23)  | 1.473(5) |
| C(22)-H(22A) | 0.9700   |
| C(22)-H(22B) | 0.9700   |
| C(23)-H(23A) | 0.9600   |
| C(23)-H(23B) | 0.9600   |

---

|              |          |
|--------------|----------|
| C(23)-H(23C) | 0.9600   |
| C(25)-C(26)  | 1.489(5) |
| C(25)-H(25A) | 0.9700   |
| C(25)-H(25B) | 0.9700   |
| C(26)-H(26A) | 0.9600   |
| C(26)-H(26B) | 0.9600   |
| C(26)-H(26C) | 0.9600   |
| C(27)-C(28)  | 1.372(4) |
| C(27)-C(32)  | 1.372(4) |
| C(28)-C(29)  | 1.400(4) |
| C(28)-H(28A) | 0.9300   |
| C(29)-C(30)  | 1.414(4) |
| C(29)-C(40)  | 1.443(3) |
| C(30)-C(37)  | 1.391(3) |
| C(30)-C(31)  | 1.418(3) |
| C(31)-C(32)  | 1.396(4) |
| C(31)-C(33)  | 1.450(4) |
| C(32)-H(32A) | 0.9300   |
| C(33)-C(34)  | 1.375(4) |
| C(33)-C(50)  | 1.492(3) |
| C(34)-C(36)  | 1.411(3) |
| C(34)-C(35)  | 1.497(4) |
| C(35)-H(35A) | 0.9600   |
| C(35)-H(35B) | 0.9600   |
| C(35)-H(35C) | 0.9600   |
| C(36)-C(37)  | 1.375(3) |
| C(36)-C(42)  | 1.433(3) |
| C(38)-C(40)  | 1.373(4) |
| C(38)-C(39)  | 1.497(4) |

---

|                  |          |
|------------------|----------|
| C(39)-H(39A)     | 0.9600   |
| C(39)-H(39B)     | 0.9600   |
| C(39)-H(39C)     | 0.9600   |
| C(40)-C(47)      | 1.494(4) |
| C(41)-C(46)      | 1.402(4) |
| C(41)-C(42)      | 1.404(4) |
| C(42)-C(43)      | 1.395(4) |
| C(43)-C(44)      | 1.372(5) |
| C(43)-H(43A)     | 0.9300   |
| C(44)-C(45)      | 1.374(5) |
| C(44)-H(44A)     | 0.9300   |
| C(45)-C(46)      | 1.375(5) |
| C(45)-H(45A)     | 0.9300   |
| C(46)-H(46A)     | 0.9300   |
| C(48)-C(49)      | 1.411(6) |
| C(48)-H(48A)     | 0.9700   |
| C(48)-H(48B)     | 0.9700   |
| C(49)-H(49A)     | 0.9600   |
| C(49)-H(49B)     | 0.9600   |
| C(49)-H(49C)     | 0.9600   |
| C(51)-C(52)      | 1.436(5) |
| C(51)-H(51A)     | 0.9700   |
| C(51)-H(51B)     | 0.9700   |
| C(52)-H(52A)     | 0.9600   |
| C(52)-H(52B)     | 0.9600   |
| C(52)-H(52C)     | 0.9600   |
| C(21)-O(2)-C(22) | 117.0(2) |
| C(24)-O(4)-C(25) | 117.6(2) |
| C(47)-O(6)-C(48) | 117.1(3) |

|                  |          |
|------------------|----------|
| C(50)-O(8)-C(51) | 116.0(2) |
| C(11)-N(1)-C(12) | 119.5(2) |
| C(11)-N(1)-C(14) | 106.4(2) |
| C(12)-N(1)-C(14) | 134.0(2) |
| C(37)-N(2)-C(38) | 118.9(2) |
| C(37)-N(2)-C(41) | 105.8(2) |
| C(38)-N(2)-C(41) | 135.3(2) |
| F(1)-C(1)-C(6)   | 117.7(2) |
| F(1)-C(1)-C(2)   | 116.4(2) |
| C(6)-C(1)-C(2)   | 125.8(2) |
| C(1)-C(2)-C(3)   | 118.4(2) |
| C(1)-C(2)-H(2A)  | 120.8    |
| C(3)-C(2)-H(2A)  | 120.8    |
| C(2)-C(3)-C(4)   | 116.7(2) |
| C(2)-C(3)-C(13)  | 125.6(2) |
| C(4)-C(3)-C(13)  | 117.6(2) |
| C(11)-C(4)-C(3)  | 117.8(2) |
| C(11)-C(4)-C(5)  | 118.3(2) |
| C(3)-C(4)-C(5)   | 123.9(2) |
| C(6)-C(5)-C(4)   | 116.8(2) |
| C(6)-C(5)-C(7)   | 125.7(2) |
| C(4)-C(5)-C(7)   | 117.4(2) |
| C(1)-C(6)-C(5)   | 118.3(2) |
| C(1)-C(6)-H(6A)  | 120.9    |
| C(5)-C(6)-H(6A)  | 120.9    |
| C(8)-C(7)-C(5)   | 122.2(2) |
| C(8)-C(7)-C(21)  | 118.3(2) |
| C(5)-C(7)-C(21)  | 119.5(3) |
| C(7)-C(8)-C(10)  | 119.0(2) |

---

|                    |          |
|--------------------|----------|
| C(7)-C(8)-C(9)     | 123.5(3) |
| C(10)-C(8)-C(9)    | 117.4(3) |
| C(8)-C(9)-H(9A)    | 109.5    |
| C(8)-C(9)-H(9B)    | 109.5    |
| H(9A)-C(9)-H(9B)   | 109.5    |
| C(8)-C(9)-H(9C)    | 109.5    |
| H(9A)-C(9)-H(9C)   | 109.5    |
| H(9B)-C(9)-H(9C)   | 109.5    |
| C(11)-C(10)-C(8)   | 118.9(2) |
| C(11)-C(10)-C(15)  | 106.2(2) |
| C(8)-C(10)-C(15)   | 134.9(2) |
| N(1)-C(11)-C(10)   | 111.8(2) |
| N(1)-C(11)-C(4)    | 124.1(2) |
| C(10)-C(11)-C(4)   | 124.1(2) |
| C(13)-C(12)-N(1)   | 118.2(2) |
| C(13)-C(12)-C(20)  | 123.5(2) |
| N(1)-C(12)-C(20)   | 118.3(2) |
| C(12)-C(13)-C(3)   | 122.7(2) |
| C(12)-C(13)-C(24)  | 119.9(2) |
| C(3)-C(13)-C(24)   | 117.3(2) |
| C(19)-C(14)-C(15)  | 120.4(2) |
| C(19)-C(14)-N(1)   | 132.0(3) |
| C(15)-C(14)-N(1)   | 107.7(2) |
| C(16)-C(15)-C(14)  | 119.5(3) |
| C(16)-C(15)-C(10)  | 132.5(3) |
| C(14)-C(15)-C(10)  | 108.0(2) |
| C(17)-C(16)-C(15)  | 118.6(3) |
| C(17)-C(16)-H(16A) | 120.7    |
| C(15)-C(16)-H(16A) | 120.7    |



|                     |          |
|---------------------|----------|
| C(16)-C(17)-C(18)   | 121.7(3) |
| C(16)-C(17)-H(17A)  | 119.1    |
| C(18)-C(17)-H(17A)  | 119.1    |
| C(19)-C(18)-C(17)   | 120.9(3) |
| C(19)-C(18)-H(18A)  | 119.6    |
| C(17)-C(18)-H(18A)  | 119.6    |
| C(18)-C(19)-C(14)   | 118.9(3) |
| C(18)-C(19)-H(19A)  | 120.6    |
| C(14)-C(19)-H(19A)  | 120.6    |
| C(12)-C(20)-H(20A)  | 109.5    |
| C(12)-C(20)-H(20B)  | 109.5    |
| H(20A)-C(20)-H(20B) | 109.5    |
| C(12)-C(20)-H(20C)  | 109.5    |
| H(20A)-C(20)-H(20C) | 109.5    |
| H(20B)-C(20)-H(20C) | 109.5    |
| O(1)-C(21)-O(2)     | 122.2(3) |
| O(1)-C(21)-C(7)     | 125.1(3) |
| O(2)-C(21)-C(7)     | 112.8(2) |
| O(2)-C(22)-C(23)    | 111.5(3) |
| O(2)-C(22)-H(22A)   | 109.3    |
| C(23)-C(22)-H(22A)  | 109.3    |
| O(2)-C(22)-H(22B)   | 109.3    |
| C(23)-C(22)-H(22B)  | 109.3    |
| H(22A)-C(22)-H(22B) | 108.0    |
| C(22)-C(23)-H(23A)  | 109.5    |
| C(22)-C(23)-H(23B)  | 109.5    |
| H(23A)-C(23)-H(23B) | 109.5    |
| C(22)-C(23)-H(23C)  | 109.5    |
| H(23A)-C(23)-H(23C) | 109.5    |

|                     |          |
|---------------------|----------|
| H(23B)-C(23)-H(23C) | 109.5    |
| O(3)-C(24)-O(4)     | 122.0(2) |
| O(3)-C(24)-C(13)    | 128.5(2) |
| O(4)-C(24)-C(13)    | 109.4(2) |
| O(4)-C(25)-C(26)    | 106.0(3) |
| O(4)-C(25)-H(25A)   | 110.5    |
| C(26)-C(25)-H(25A)  | 110.5    |
| O(4)-C(25)-H(25B)   | 110.5    |
| C(26)-C(25)-H(25B)  | 110.5    |
| H(25A)-C(25)-H(25B) | 108.7    |
| C(25)-C(26)-H(26A)  | 109.5    |
| C(25)-C(26)-H(26B)  | 109.5    |
| H(26A)-C(26)-H(26B) | 109.5    |
| C(25)-C(26)-H(26C)  | 109.5    |
| H(26A)-C(26)-H(26C) | 109.5    |
| H(26B)-C(26)-H(26C) | 109.5    |
| F(2)-C(27)-C(28)    | 117.2(2) |
| F(2)-C(27)-C(32)    | 117.0(2) |
| C(28)-C(27)-C(32)   | 125.9(2) |
| C(27)-C(28)-C(29)   | 117.7(2) |
| C(27)-C(28)-H(28A)  | 121.1    |
| C(29)-C(28)-H(28A)  | 121.1    |
| C(28)-C(29)-C(30)   | 117.4(2) |
| C(28)-C(29)-C(40)   | 124.7(2) |
| C(30)-C(29)-C(40)   | 117.9(2) |
| C(37)-C(30)-C(29)   | 117.8(2) |
| C(37)-C(30)-C(31)   | 118.4(2) |
| C(29)-C(30)-C(31)   | 123.7(2) |
| C(32)-C(31)-C(30)   | 116.7(2) |

|                     |          |
|---------------------|----------|
| C(32)-C(31)-C(33)   | 126.2(2) |
| C(30)-C(31)-C(33)   | 117.1(2) |
| C(27)-C(32)-C(31)   | 118.6(2) |
| C(27)-C(32)-H(32A)  | 120.7    |
| C(31)-C(32)-H(32A)  | 120.7    |
| C(34)-C(33)-C(31)   | 122.9(2) |
| C(34)-C(33)-C(50)   | 118.2(2) |
| C(31)-C(33)-C(50)   | 118.8(2) |
| C(33)-C(34)-C(36)   | 118.3(2) |
| C(33)-C(34)-C(35)   | 123.8(2) |
| C(36)-C(34)-C(35)   | 117.8(2) |
| C(34)-C(35)-H(35A)  | 109.5    |
| C(34)-C(35)-H(35B)  | 109.5    |
| H(35A)-C(35)-H(35B) | 109.5    |
| C(34)-C(35)-H(35C)  | 109.5    |
| H(35A)-C(35)-H(35C) | 109.5    |
| H(35B)-C(35)-H(35C) | 109.5    |
| C(37)-C(36)-C(34)   | 119.5(2) |
| C(37)-C(36)-C(42)   | 106.1(2) |
| C(34)-C(36)-C(42)   | 134.4(2) |
| C(36)-C(37)-N(2)    | 112.0(2) |
| C(36)-C(37)-C(30)   | 123.7(2) |
| N(2)-C(37)-C(30)    | 124.2(2) |
| C(40)-C(38)-N(2)    | 118.0(2) |
| C(40)-C(38)-C(39)   | 122.9(3) |
| N(2)-C(38)-C(39)    | 119.1(2) |
| C(38)-C(39)-H(39A)  | 109.5    |
| C(38)-C(39)-H(39B)  | 109.5    |
| H(39A)-C(39)-H(39B) | 109.5    |

|                     |          |
|---------------------|----------|
| C(38)-C(39)-H(39C)  | 109.5    |
| H(39A)-C(39)-H(39C) | 109.5    |
| H(39B)-C(39)-H(39C) | 109.5    |
| C(38)-C(40)-C(29)   | 123.2(2) |
| C(38)-C(40)-C(47)   | 120.1(2) |
| C(29)-C(40)-C(47)   | 116.7(2) |
| C(46)-C(41)-C(42)   | 119.7(3) |
| C(46)-C(41)-N(2)    | 132.0(3) |
| C(42)-C(41)-N(2)    | 108.2(2) |
| C(43)-C(42)-C(41)   | 120.2(3) |
| C(43)-C(42)-C(36)   | 132.0(3) |
| C(41)-C(42)-C(36)   | 107.8(2) |
| C(44)-C(43)-C(42)   | 118.8(3) |
| C(44)-C(43)-H(43A)  | 120.6    |
| C(42)-C(43)-H(43A)  | 120.6    |
| C(43)-C(44)-C(45)   | 121.4(3) |
| C(43)-C(44)-H(44A)  | 119.3    |
| C(45)-C(44)-H(44A)  | 119.3    |
| C(44)-C(45)-C(46)   | 121.2(3) |
| C(44)-C(45)-H(45A)  | 119.4    |
| C(46)-C(45)-H(45A)  | 119.4    |
| C(45)-C(46)-C(41)   | 118.7(3) |
| C(45)-C(46)-H(46A)  | 120.6    |
| C(41)-C(46)-H(46A)  | 120.6    |
| O(5)-C(47)-O(6)     | 122.2(3) |
| O(5)-C(47)-C(40)    | 125.1(2) |
| O(6)-C(47)-C(40)    | 112.7(2) |
| C(49)-C(48)-O(6)    | 110.6(4) |
| C(49)-C(48)-H(48A)  | 109.5    |

|                     |            |
|---------------------|------------|
| O(6)-C(48)-H(48A)   | 109.5      |
| C(49)-C(48)-H(48B)  | 109.5      |
| O(6)-C(48)-H(48B)   | 109.5      |
| H(48A)-C(48)-H(48B) | 108.1      |
| C(48)-C(49)-H(49A)  | 109.5      |
| C(48)-C(49)-H(49B)  | 109.5      |
| H(49A)-C(49)-H(49B) | 109.5      |
| C(48)-C(49)-H(49C)  | 109.5      |
| H(49A)-C(49)-H(49C) | 109.5      |
| H(49B)-C(49)-H(49C) | 109.5      |
| O(7)-C(50)-O(8)     | 122.6(2)   |
| O(7)-C(50)-C(33)    | 124.7(2)   |
| O(8)-C(50)-C(33)    | 112.8(2)   |
| C(52)-C(51)-O(8)    | 109.0(3)   |
| C(52)-C(51)-H(51A)  | 109.9      |
| O(8)-C(51)-H(51A)   | 109.9      |
| C(52)-C(51)-H(51B)  | 109.9      |
| O(8)-C(51)-H(51B)   | 109.9      |
| H(51A)-C(51)-H(51B) | 108.3      |
| C(51)-C(52)-H(52A)  | 109.5      |
| C(51)-C(52)-H(52B)  | 109.5      |
| H(52A)-C(52)-H(52B) | 109.5      |
| C(51)-C(52)-H(52C)  | 109.5      |
| H(52A)-C(52)-H(52C) | 109.5      |
| H(52B)-C(52)-H(52C) | 109.5      |
| C(6)-C(5)-C(4)      | 121.27(17) |
| C(6)-C(5)-H(22)     | 117.3(12)  |
| C(4)-C(5)-H(22)     | 121.3(12)  |
| C(5)-C(6)-C(7)      | 117.35(18) |

|                   |            |
|-------------------|------------|
| C(5)-C(6)-H(15)   | 122.0(10)  |
| C(7)-C(6)-H(15)   | 120.6(10)  |
| N(1)-C(7)-C(6)    | 128.78(15) |
| N(1)-C(7)-C(8)    | 108.55(12) |
| C(6)-C(7)-C(8)    | 122.65(15) |
| C(3)-C(8)-C(7)    | 118.31(14) |
| C(3)-C(8)-C(2)    | 135.01(15) |
| C(7)-C(8)-C(2)    | 106.66(12) |
| C(10)-C(9)-C(1)   | 123.81(12) |
| C(10)-C(9)-C(14)  | 119.78(13) |
| C(1)-C(9)-C(14)   | 116.41(11) |
| C(11)-C(10)-C(9)  | 120.30(14) |
| C(11)-C(10)-H(13) | 120.4(9)   |
| C(9)-C(10)-H(13)  | 119.3(9)   |
| C(10)-C(11)-C(12) | 120.54(14) |
| C(10)-C(11)-H(18) | 118.5(9)   |
| C(12)-C(11)-H(18) | 120.9(9)   |
| C(13)-C(12)-C(11) | 120.44(15) |
| C(13)-C(12)-H(17) | 119.4(11)  |
| C(11)-C(12)-H(17) | 120.2(11)  |
| C(12)-C(13)-C(14) | 121.11(14) |
| C(12)-C(13)-H(9)  | 118.6(9)   |
| C(14)-C(13)-H(9)  | 120.3(9)   |
| C(13)-C(14)-C(9)  | 117.83(12) |
| C(13)-C(14)-C(15) | 122.43(12) |
| C(9)-C(14)-C(15)  | 119.74(12) |
| C(16)-C(15)-C(14) | 122.77(12) |
| C(16)-C(15)-C(18) | 119.86(12) |
| C(14)-C(15)-C(18) | 117.27(12) |

|                     |            |
|---------------------|------------|
| C(15)-C(16)-C(2)    | 117.76(12) |
| C(15)-C(16)-C(17)   | 122.20(13) |
| C(2)-C(16)-C(17)    | 120.02(13) |
| C(16)-C(17)-H(19A)  | 115.6(12)  |
| C(16)-C(17)-H(19B)  | 112.6(13)  |
| H(19A)-C(17)-H(19B) | 107.6(18)  |
| C(16)-C(17)-H(19C)  | 110.9(13)  |
| H(19A)-C(17)-H(19C) | 105.7(17)  |
| H(19B)-C(17)-H(19C) | 104(2)     |
| O(1)-C(18)-O(2)     | 123.16(13) |
| O(1)-C(18)-C(15)    | 124.23(12) |
| O(2)-C(18)-C(15)    | 112.60(11) |
| O(2)-C(19)-C(20)    | 110.75(15) |
| O(2)-C(19)-H(20A)   | 107.8(11)  |
| C(20)-C(19)-H(20A)  | 111.8(11)  |
| O(2)-C(19)-H(20B)   | 100.2(11)  |
| C(20)-C(19)-H(20B)  | 112.2(11)  |
| H(20A)-C(19)-H(20B) | 113.4(16)  |
| C(19)-C(20)-H(16A)  | 111.7(14)  |
| C(19)-C(20)-H(16B)  | 109.3(13)  |
| H(16A)-C(20)-H(16B) | 109(2)     |
| C(19)-C(20)-H(16C)  | 111.5(13)  |
| H(16A)-C(20)-H(16C) | 106(2)     |
| H(16B)-C(20)-H(16C) | 108.9(17)  |

**Table S11. Anisotropic displacement parameters for shelxl.**

|      | U11    | U22   | U33   | U23    | U13   | U12   |
|------|--------|-------|-------|--------|-------|-------|
| O(1) | 133(2) | 61(1) | 72(1) | -15(1) | 40(1) | -5(1) |
| O(2) | 82(1)  | 54(1) | 68(1) | 6(1)   | 27(1) | 3(1)  |

|       |        |        |        |       |       |       |
|-------|--------|--------|--------|-------|-------|-------|
| O(3)  | 124(2) | 53(1)  | 75(1)  | -1(1) | 11(1) | 28(1) |
| O(4)  | 82(1)  | 48(1)  | 71(1)  | 15(1) | 17(1) | 26(1) |
| O(5)  | 62(1)  | 123(2) | 87(1)  | 47(1) | 31(1) | 30(1) |
| O(6)  | 65(1)  | 122(2) | 67(1)  | 30(1) | 11(1) | 16(1) |
| O(7)  | 71(1)  | 102(2) | 86(1)  | 39(1) | 45(1) | 43(1) |
| O(8)  | 62(1)  | 72(1)  | 65(1)  | 21(1) | 25(1) | 36(1) |
| F(1)  | 55(1)  | 77(1)  | 114(1) | 22(1) | 26(1) | 25(1) |
| F(2)  | 76(1)  | 50(1)  | 101(1) | -2(1) | 28(1) | 21(1) |
| N(1)  | 64(1)  | 53(1)  | 49(1)  | 15(1) | 20(1) | 25(1) |
| N(2)  | 78(2)  | 65(1)  | 49(1)  | 14(1) | 22(1) | 37(1) |
| C(1)  | 53(1)  | 61(2)  | 59(1)  | 16(1) | 18(1) | 21(1) |
| C(2)  | 62(2)  | 49(1)  | 55(1)  | 12(1) | 22(1) | 23(1) |
| C(3)  | 57(1)  | 44(1)  | 39(1)  | 10(1) | 18(1) | 20(1) |
| C(4)  | 58(1)  | 43(1)  | 36(1)  | 10(1) | 16(1) | 17(1) |
| C(5)  | 63(1)  | 46(1)  | 37(1)  | 10(1) | 15(1) | 16(1) |
| C(6)  | 58(2)  | 54(2)  | 53(1)  | 12(1) | 13(1) | 9(1)  |
| C(7)  | 79(2)  | 42(1)  | 40(1)  | 9(1)  | 18(1) | 14(1) |
| C(8)  | 84(2)  | 45(1)  | 39(1)  | 11(1) | 20(1) | 25(1) |
| C(9)  | 110(2) | 50(2)  | 68(2)  | 14(1) | 28(2) | 36(2) |
| C(10) | 67(2)  | 40(1)  | 38(1)  | 11(1) | 19(1) | 25(1) |
| C(11) | 60(1)  | 44(1)  | 37(1)  | 12(1) | 17(1) | 21(1) |
| C(12) | 58(1)  | 47(1)  | 40(1)  | 13(1) | 18(1) | 19(1) |
| C(13) | 59(1)  | 43(1)  | 40(1)  | 10(1) | 17(1) | 18(1) |
| C(14) | 66(2)  | 59(2)  | 44(1)  | 19(1) | 23(1) | 32(1) |
| C(15) | 77(2)  | 59(2)  | 44(1)  | 17(1) | 25(1) | 37(1) |
| C(16) | 101(2) | 71(2)  | 64(2)  | 22(1) | 35(2) | 53(2) |
| C(17) | 100(3) | 104(3) | 75(2)  | 33(2) | 43(2) | 71(2) |
| C(18) | 79(2)  | 104(3) | 80(2)  | 33(2) | 39(2) | 51(2) |
| C(19) | 64(2)  | 84(2)  | 68(2)  | 27(1) | 26(1) | 34(2) |

---



|       |        |        |        |       |       |       |
|-------|--------|--------|--------|-------|-------|-------|
| C(20) | 60(2)  | 58(2)  | 64(2)  | 16(1) | 21(1) | 16(1) |
| C(21) | 89(2)  | 46(1)  | 46(1)  | 9(1)  | 17(1) | 12(1) |
| C(22) | 77(2)  | 60(2)  | 93(2)  | 15(2) | 22(2) | 7(2)  |
| C(23) | 94(3)  | 90(3)  | 142(4) | 58(3) | 23(2) | 8(2)  |
| C(24) | 62(1)  | 46(1)  | 47(1)  | 7(1)  | 17(1) | 17(1) |
| C(25) | 87(2)  | 54(2)  | 99(2)  | 22(2) | 26(2) | 30(2) |
| C(26) | 87(3)  | 82(2)  | 154(4) | 40(3) | -3(3) | 30(2) |
| C(27) | 66(2)  | 47(1)  | 59(1)  | 4(1)  | 23(1) | 22(1) |
| C(28) | 55(1)  | 59(2)  | 54(1)  | 5(1)  | 20(1) | 18(1) |
| C(29) | 55(1)  | 59(1)  | 41(1)  | 11(1) | 19(1) | 25(1) |
| C(30) | 56(1)  | 55(1)  | 37(1)  | 8(1)  | 17(1) | 24(1) |
| C(31) | 55(1)  | 55(1)  | 38(1)  | 9(1)  | 18(1) | 24(1) |
| C(32) | 58(2)  | 58(2)  | 54(1)  | 7(1)  | 21(1) | 27(1) |
| C(33) | 54(1)  | 60(1)  | 39(1)  | 10(1) | 16(1) | 23(1) |
| C(34) | 62(1)  | 56(1)  | 36(1)  | 12(1) | 17(1) | 22(1) |
| C(35) | 67(2)  | 64(2)  | 56(2)  | 7(1)  | 18(1) | 14(1) |
| C(36) | 52(1)  | 45(1)  | 32(1)  | 8(1)  | 14(1) | 20(1) |
| C(37) | 61(1)  | 54(1)  | 36(1)  | 11(1) | 18(1) | 26(1) |
| C(38) | 61(2)  | 69(2)  | 44(1)  | 16(1) | 21(1) | 34(1) |
| C(39) | 80(2)  | 83(2)  | 66(2)  | 22(1) | 31(1) | 49(2) |
| C(40) | 58(1)  | 68(2)  | 44(1)  | 13(1) | 20(1) | 29(1) |
| C(41) | 76(2)  | 56(2)  | 38(1)  | 11(1) | 17(1) | 30(1) |
| C(42) | 77(2)  | 54(1)  | 35(1)  | 9(1)  | 17(1) | 26(1) |
| C(43) | 88(2)  | 60(2)  | 53(1)  | 11(1) | 19(1) | 17(2) |
| C(44) | 117(3) | 53(2)  | 61(2)  | 10(1) | 23(2) | 21(2) |
| C(45) | 127(3) | 59(2)  | 60(2)  | 14(1) | 25(2) | 47(2) |
| C(46) | 97(2)  | 64(2)  | 53(1)  | 14(1) | 21(1) | 44(2) |
| C(47) | 58(2)  | 80(2)  | 58(2)  | 18(1) | 23(1) | 34(1) |
| C(48) | 67(2)  | 167(4) | 91(3)  | 40(3) | 12(2) | 9(2)  |

---

|       |        |        |        |       |        |        |
|-------|--------|--------|--------|-------|--------|--------|
| C(49) | 94(3)  | 196(6) | 121(4) | 27(4) | 8(3)   | 36(3)  |
| C(50) | 52(1)  | 62(2)  | 48(1)  | 10(1) | 16(1)  | 21(1)  |
| C(51) | 63(2)  | 77(2)  | 89(2)  | 11(2) | 20(2)  | 37(2)  |
| C(52) | 171(5) | 132(4) | 198(5) | 98(4) | 103(4) | 114(4) |

**Table S12. Hydrogen coordinates and isotropic displacement parameters for shelxl.**

|        | x     | y     | z    | U(eq) |
|--------|-------|-------|------|-------|
| H(2A)  | 7838  | 2791  | 1265 | 64    |
| H(6A)  | 6157  | -397  | 572  | 69    |
| H(9A)  | 8651  | -2918 | 705  | 110   |
| H(9B)  | 9901  | -2431 | 1529 | 110   |
| H(9C)  | 9801  | -2453 | 420  | 110   |
| H(16A) | 11794 | -1668 | 1248 | 85    |
| H(17A) | 13823 | -985  | 1617 | 97    |
| H(18A) | 14779 | 839   | 2075 | 94    |
| H(19A) | 13708 | 2044  | 2133 | 80    |
| H(20A) | 12300 | 4085  | 2183 | 92    |
| H(20B) | 12792 | 3310  | 1627 | 92    |
| H(20C) | 12908 | 3304  | 2735 | 92    |
| H(22A) | 4970  | -3256 | 133  | 97    |
| H(22B) | 4661  | -2747 | 1022 | 97    |
| H(23A) | 4787  | -4444 | 1185 | 170   |
| H(23B) | 5799  | -3589 | 2053 | 170   |
| H(23C) | 6106  | -4097 | 1165 | 170   |
| H(25A) | 9710  | 5532  | 717  | 94    |
| H(25B) | 8892  | 5196  | 1372 | 94    |
| H(26A) | 7728  | 5364  | -159 | 172   |
| H(26B) | 7337  | 4162  | -29  | 172   |
| H(26C) | 8150  | 4500  | -679 | 172   |

|        |       |       |      |     |
|--------|-------|-------|------|-----|
| H(28A) | 12901 | 4158  | 4762 | 67  |
| H(32A) | 9390  | 3802  | 4161 | 66  |
| H(35A) | 6516  | 45    | 3254 | 97  |
| H(35B) | 7078  | -794  | 3744 | 97  |
| H(35C) | 6936  | -741  | 2638 | 97  |
| H(39A) | 14237 | 904   | 4497 | 104 |
| H(39B) | 13305 | -38   | 3658 | 104 |
| H(39C) | 13444 | -98   | 4762 | 104 |
| H(43A) | 7825  | -2082 | 3208 | 83  |
| H(44A) | 8510  | -3559 | 3141 | 95  |
| H(45A) | 10501 | -3359 | 3453 | 95  |
| H(46A) | 11882 | -1671 | 3818 | 82  |
| H(48A) | 16355 | 3077  | 5557 | 139 |
| H(48B) | 16052 | 4020  | 6095 | 139 |
| H(49A) | 17370 | 3446  | 7174 | 217 |
| H(49B) | 16467 | 2277  | 6875 | 217 |
| H(49C) | 16166 | 3220  | 7412 | 217 |
| H(51A) | 5729  | 2720  | 3124 | 89  |
| H(51B) | 6715  | 3685  | 3913 | 89  |
| H(52A) | 5815  | 4294  | 2571 | 208 |
| H(52B) | 6189  | 3522  | 1899 | 208 |
| H(52C) | 7170  | 4485  | 2687 | 208 |

**Table S13. Bond angles [deg] for shelxl.**

| Bond                | Bond angles |
|---------------------|-------------|
| [deg]               |             |
| F(1)-C(1)-C(2)-C(3) | -178.3(2)   |
| C(6)-C(1)-C(2)-C(3) | 0.5(4)      |
| C(1)-C(2)-C(3)-C(4) | -1.5(3)     |

|                        |             |
|------------------------|-------------|
| C(1)-C(2)-C(3)-C(13)   | 179.1(2)    |
| C(2)-C(3)-C(4)-C(11)   | 179.86(19)  |
| C(13)-C(3)-C(4)-C(11)  | -0.6(3)     |
| C(2)-C(3)-C(4)-C(5)    | 1.2(3)      |
| C(13)-C(3)-C(4)-C(5)   | -179.32(19) |
| C(11)-C(4)-C(5)-C(6)   | -178.6(2)   |
| C(3)-C(4)-C(5)-C(6)    | 0.1(3)      |
| C(11)-C(4)-C(5)-C(7)   | -0.7(3)     |
| C(3)-C(4)-C(5)-C(7)    | 178.0(2)    |
| F(1)-C(1)-C(6)-C(5)    | 179.6(2)    |
| C(2)-C(1)-C(6)-C(5)    | 0.8(4)      |
| C(4)-C(5)-C(6)-C(1)    | -1.1(3)     |
| C(7)-C(5)-C(6)-C(1)    | -178.8(2)   |
| C(6)-C(5)-C(7)-C(8)    | 177.6(2)    |
| C(4)-C(5)-C(7)-C(8)    | -0.1(3)     |
| C(6)-C(5)-C(7)-C(21)   | -2.2(4)     |
| C(4)-C(5)-C(7)-C(21)   | -179.8(2)   |
| C(5)-C(7)-C(8)-C(10)   | -0.1(3)     |
| C(21)-C(7)-C(8)-C(10)  | 179.6(2)    |
| C(5)-C(7)-C(8)-C(9)    | 176.9(2)    |
| C(21)-C(7)-C(8)-C(9)   | -3.3(4)     |
| C(7)-C(8)-C(10)-C(11)  | 1.1(3)      |
| C(9)-C(8)-C(10)-C(11)  | -176.1(2)   |
| C(7)-C(8)-C(10)-C(15)  | -179.7(2)   |
| C(9)-C(8)-C(10)-C(15)  | 3.0(4)      |
| C(12)-N(1)-C(11)-C(10) | 177.98(18)  |
| C(14)-N(1)-C(11)-C(10) | 0.4(2)      |
| C(12)-N(1)-C(11)-C(4)  | -1.2(3)     |
| C(14)-N(1)-C(11)-C(4)  | -178.8(2)   |

|                         |             |
|-------------------------|-------------|
| C(8)-C(10)-C(11)-N(1)   | 178.79(18)  |
| C(15)-C(10)-C(11)-N(1)  | -0.6(2)     |
| C(8)-C(10)-C(11)-C(4)   | -2.0(3)     |
| C(15)-C(10)-C(11)-C(4)  | 178.6(2)    |
| C(3)-C(4)-C(11)-N(1)    | 2.1(3)      |
| C(5)-C(4)-C(11)-N(1)    | -179.11(19) |
| C(3)-C(4)-C(11)-C(10)   | -176.98(19) |
| C(5)-C(4)-C(11)-C(10)   | 1.8(3)      |
| C(11)-N(1)-C(12)-C(13)  | -1.2(3)     |
| C(14)-N(1)-C(12)-C(13)  | 175.5(2)    |
| C(11)-N(1)-C(12)-C(20)  | -179.4(2)   |
| C(14)-N(1)-C(12)-C(20)  | -2.7(4)     |
| N(1)-C(12)-C(13)-C(3)   | 2.7(3)      |
| C(20)-C(12)-C(13)-C(3)  | -179.2(2)   |
| N(1)-C(12)-C(13)-C(24)  | -173.89(19) |
| C(20)-C(12)-C(13)-C(24) | 4.2(3)      |
| C(2)-C(3)-C(13)-C(12)   | 177.7(2)    |
| C(4)-C(3)-C(13)-C(12)   | -1.8(3)     |
| C(2)-C(3)-C(13)-C(24)   | -5.6(3)     |
| C(4)-C(3)-C(13)-C(24)   | 174.89(19)  |
| C(11)-N(1)-C(14)-C(19)  | 178.5(3)    |
| C(12)-N(1)-C(14)-C(19)  | 1.4(4)      |
| C(11)-N(1)-C(14)-C(15)  | -0.1(2)     |
| C(12)-N(1)-C(14)-C(15)  | -177.1(2)   |
| C(19)-C(14)-C(15)-C(16) | -0.7(4)     |
| N(1)-C(14)-C(15)-C(16)  | 178.0(2)    |
| C(19)-C(14)-C(15)-C(10) | -179.0(2)   |
| N(1)-C(14)-C(15)-C(10)  | -0.3(2)     |
| C(11)-C(10)-C(15)-C(16) | -177.5(3)   |

|                         |           |
|-------------------------|-----------|
| C(8)-C(10)-C(15)-C(16)  | 3.3(5)    |
| C(11)-C(10)-C(15)-C(14) | 0.6(2)    |
| C(8)-C(10)-C(15)-C(14)  | -178.7(2) |
| C(14)-C(15)-C(16)-C(17) | 0.3(4)    |
| C(10)-C(15)-C(16)-C(17) | 178.1(3)  |
| C(15)-C(16)-C(17)-C(18) | 0.6(4)    |
| C(16)-C(17)-C(18)-C(19) | -1.0(5)   |
| C(17)-C(18)-C(19)-C(14) | 0.5(4)    |
| C(15)-C(14)-C(19)-C(18) | 0.3(4)    |
| N(1)-C(14)-C(19)-C(18)  | -178.0(3) |
| C(22)-O(2)-C(21)-O(1)   | -0.7(4)   |
| C(22)-O(2)-C(21)-C(7)   | 179.9(2)  |
| C(8)-C(7)-C(21)-O(1)    | -49.5(4)  |
| C(5)-C(7)-C(21)-O(1)    | 130.2(3)  |
| C(8)-C(7)-C(21)-O(2)    | 129.8(3)  |
| C(5)-C(7)-C(21)-O(2)    | -50.4(3)  |
| C(21)-O(2)-C(22)-C(23)  | 87.6(4)   |
| C(25)-O(4)-C(24)-O(3)   | -8.5(4)   |
| C(25)-O(4)-C(24)-C(13)  | 169.2(2)  |
| C(12)-C(13)-C(24)-O(3)  | -56.3(4)  |
| C(3)-C(13)-C(24)-O(3)   | 126.9(3)  |
| C(12)-C(13)-C(24)-O(4)  | 126.1(2)  |
| C(3)-C(13)-C(24)-O(4)   | -50.6(3)  |
| C(24)-O(4)-C(25)-C(26)  | -164.3(3) |
| F(2)-C(27)-C(28)-C(29)  | -179.1(2) |
| C(32)-C(27)-C(28)-C(29) | 1.3(4)    |
| C(27)-C(28)-C(29)-C(30) | -0.2(3)   |
| C(27)-C(28)-C(29)-C(40) | -179.8(2) |
| C(28)-C(29)-C(30)-C(37) | -179.5(2) |

|                         |             |
|-------------------------|-------------|
| C(40)-C(29)-C(30)-C(37) | 0.1(3)      |
| C(28)-C(29)-C(30)-C(31) | -0.8(3)     |
| C(40)-C(29)-C(30)-C(31) | 178.7(2)    |
| C(37)-C(30)-C(31)-C(32) | 179.5(2)    |
| C(29)-C(30)-C(31)-C(32) | 0.9(3)      |
| C(37)-C(30)-C(31)-C(33) | 1.9(3)      |
| C(29)-C(30)-C(31)-C(33) | -176.8(2)   |
| F(2)-C(27)-C(32)-C(31)  | 179.1(2)    |
| C(28)-C(27)-C(32)-C(31) | -1.3(4)     |
| C(30)-C(31)-C(32)-C(27) | 0.1(3)      |
| C(33)-C(31)-C(32)-C(27) | 177.5(2)    |
| C(32)-C(31)-C(33)-C(34) | -179.7(2)   |
| C(30)-C(31)-C(33)-C(34) | -2.3(3)     |
| C(32)-C(31)-C(33)-C(50) | -3.8(3)     |
| C(30)-C(31)-C(33)-C(50) | 173.62(19)  |
| C(31)-C(33)-C(34)-C(36) | 1.0(3)      |
| C(50)-C(33)-C(34)-C(36) | -174.92(19) |
| C(31)-C(33)-C(34)-C(35) | -176.6(2)   |
| C(50)-C(33)-C(34)-C(35) | 7.4(3)      |
| C(33)-C(34)-C(36)-C(37) | 0.7(3)      |
| C(35)-C(34)-C(36)-C(37) | 178.5(2)    |
| C(33)-C(34)-C(36)-C(42) | 178.6(2)    |
| C(35)-C(34)-C(36)-C(42) | -3.6(4)     |
| C(34)-C(36)-C(37)-N(2)  | 178.90(19)  |
| C(42)-C(36)-C(37)-N(2)  | 0.4(2)      |
| C(34)-C(36)-C(37)-C(30) | -1.1(3)     |
| C(42)-C(36)-C(37)-C(30) | -179.5(2)   |
| C(38)-N(2)-C(37)-C(36)  | -178.65(19) |
| C(41)-N(2)-C(37)-C(36)  | -0.1(2)     |

|                         |            |
|-------------------------|------------|
| C(38)-N(2)-C(37)-C(30)  | 1.3(3)     |
| C(41)-N(2)-C(37)-C(30)  | 179.9(2)   |
| C(29)-C(30)-C(37)-C(36) | 178.44(19) |
| C(31)-C(30)-C(37)-C(36) | -0.3(3)    |
| C(29)-C(30)-C(37)-N(2)  | -1.5(3)    |
| C(31)-C(30)-C(37)-N(2)  | 179.8(2)   |
| C(37)-N(2)-C(38)-C(40)  | 0.4(3)     |
| C(41)-N(2)-C(38)-C(40)  | -177.7(2)  |
| C(37)-N(2)-C(38)-C(39)  | -178.6(2)  |
| C(41)-N(2)-C(38)-C(39)  | 3.3(4)     |
| N(2)-C(38)-C(40)-C(29)  | -1.8(3)    |
| C(39)-C(38)-C(40)-C(29) | 177.1(2)   |
| N(2)-C(38)-C(40)-C(47)  | 178.6(2)   |
| C(39)-C(38)-C(40)-C(47) | -2.4(4)    |
| C(28)-C(29)-C(40)-C(38) | -178.9(2)  |
| C(30)-C(29)-C(40)-C(38) | 1.6(3)     |
| C(28)-C(29)-C(40)-C(47) | 0.7(3)     |
| C(30)-C(29)-C(40)-C(47) | -178.8(2)  |
| C(37)-N(2)-C(41)-C(46)  | -178.3(3)  |
| C(38)-N(2)-C(41)-C(46)  | -0.1(5)    |
| C(37)-N(2)-C(41)-C(42)  | -0.3(2)    |
| C(38)-N(2)-C(41)-C(42)  | 177.9(2)   |
| C(46)-C(41)-C(42)-C(43) | 0.3(3)     |
| N(2)-C(41)-C(42)-C(43)  | -178.0(2)  |
| C(46)-C(41)-C(42)-C(36) | 178.9(2)   |
| N(2)-C(41)-C(42)-C(36)  | 0.6(2)     |
| C(37)-C(36)-C(42)-C(43) | 177.7(2)   |
| C(34)-C(36)-C(42)-C(43) | -0.4(4)    |
| C(37)-C(36)-C(42)-C(41) | -0.6(2)    |



|                         |            |
|-------------------------|------------|
| C(34)-C(36)-C(42)-C(41) | -178.8(2)  |
| C(41)-C(42)-C(43)-C(44) | -0.4(4)    |
| C(36)-C(42)-C(43)-C(44) | -178.6(2)  |
| C(42)-C(43)-C(44)-C(45) | 0.5(4)     |
| C(43)-C(44)-C(45)-C(46) | -0.5(5)    |
| C(44)-C(45)-C(46)-C(41) | 0.4(4)     |
| C(42)-C(41)-C(46)-C(45) | -0.2(4)    |
| N(2)-C(41)-C(46)-C(45)  | 177.5(2)   |
| C(48)-O(6)-C(47)-O(5)   | -3.4(5)    |
| C(48)-O(6)-C(47)-C(40)  | 177.8(3)   |
| C(38)-C(40)-C(47)-O(5)  | 114.3(3)   |
| C(29)-C(40)-C(47)-O(5)  | -65.3(4)   |
| C(38)-C(40)-C(47)-O(6)  | -67.0(3)   |
| C(29)-C(40)-C(47)-O(6)  | 113.4(3)   |
| C(47)-O(6)-C(48)-C(49)  | -177.8(4)  |
| C(51)-O(8)-C(50)-O(7)   | 5.4(4)     |
| C(51)-O(8)-C(50)-C(33)  | -173.8(2)  |
| C(34)-C(33)-C(50)-O(7)  | 50.2(4)    |
| C(31)-C(33)-C(50)-O(7)  | -125.9(3)  |
| C(34)-C(33)-C(50)-O(8)  | -130.6(2)  |
| C(31)-C(33)-C(50)-O(8)  | 53.3(3)    |
| C(50)-O(8)-C(51)-C(52)  | -173.7(4)  |
| C(8)-C(2)-C(16)-C(17)   | 2.6(2)     |
| C(19)-O(2)-C(18)-O(1)   | 1.1(2)     |
| C(19)-O(2)-C(18)-C(15)  | 179.96(12) |
| C(16)-C(15)-C(18)-O(1)  | -87.88(19) |
| C(14)-C(15)-C(18)-O(1)  | 88.72(17)  |
| C(16)-C(15)-C(18)-O(2)  | 93.24(15)  |
| C(14)-C(15)-C(18)-O(2)  | -90.15(15) |

C(18)-O(2)-C(19)-C(20)

88.46(18)

---

## 9. References

- 1 a) Y. Wei, I. Deb and N. Yoshikai, *J. Am. Chem. Soc.*, 2012, **134**, 9098; b) S. Gore, S. Baskaran and B. König, *Org. Lett.*, 2012, **14**, 4568; c) S.-D. Yang, C.-L. Sun, Z. Fang, B.-J. Li, Y.-Z. Li and Z.-J. Shi, *Angew. Chem., Int. Ed.* 2008, **47**, 1473.
- 2 a) X. Chen, Y. Xie, X. Xiao, G. Li, Y. Deng, H. Jiang and W. Zeng, *Chem. Commun.*, 2015, **51**, 15328; b) R. Pasceri, H. E. Bartrum, C. J. Hayes and C. J. Moody, *Chem. Commun.*, 2012, **48**, 12077.
- 3 a) S. S. Li, Y. Q. Xia, F. Z. Hu, C. F. Liu, F. Su and L. Dong, *Chem. Asian J.*, 2016, **11**, 3165; b) B. Li, B. Zhang, X. Zhang, X. Fan, *Chem. Commun.* 2017, **53**, 1297.
- 4 V. Pirovano, D. Facoetti, M. Dell'Acqua, E. Della Fontana, G. Abbiati and E. Rossi, *Org. Lett.*, 2013, **15**, 3812.

### 10. $^1\text{H}$ NMR and $^{13}\text{C}$ NMR spectrum for all isolated products.

1) 7-Methyl-2-phenyl-1H-indole (**2k**) (Using  $\text{CDCl}_3$  as solvent)

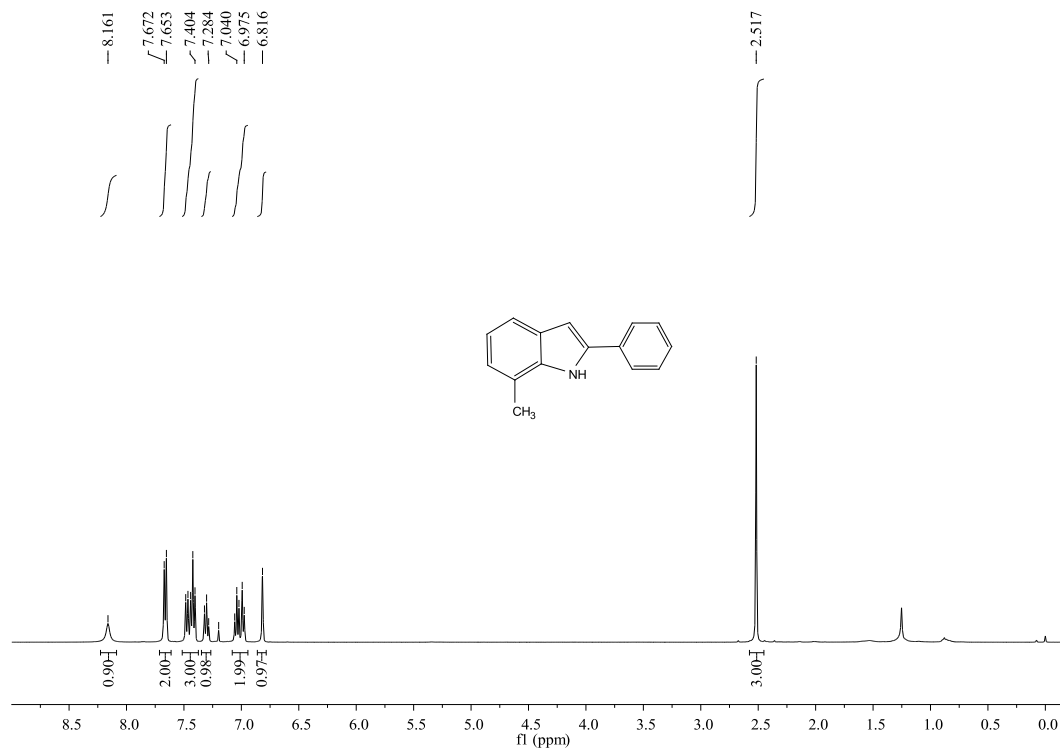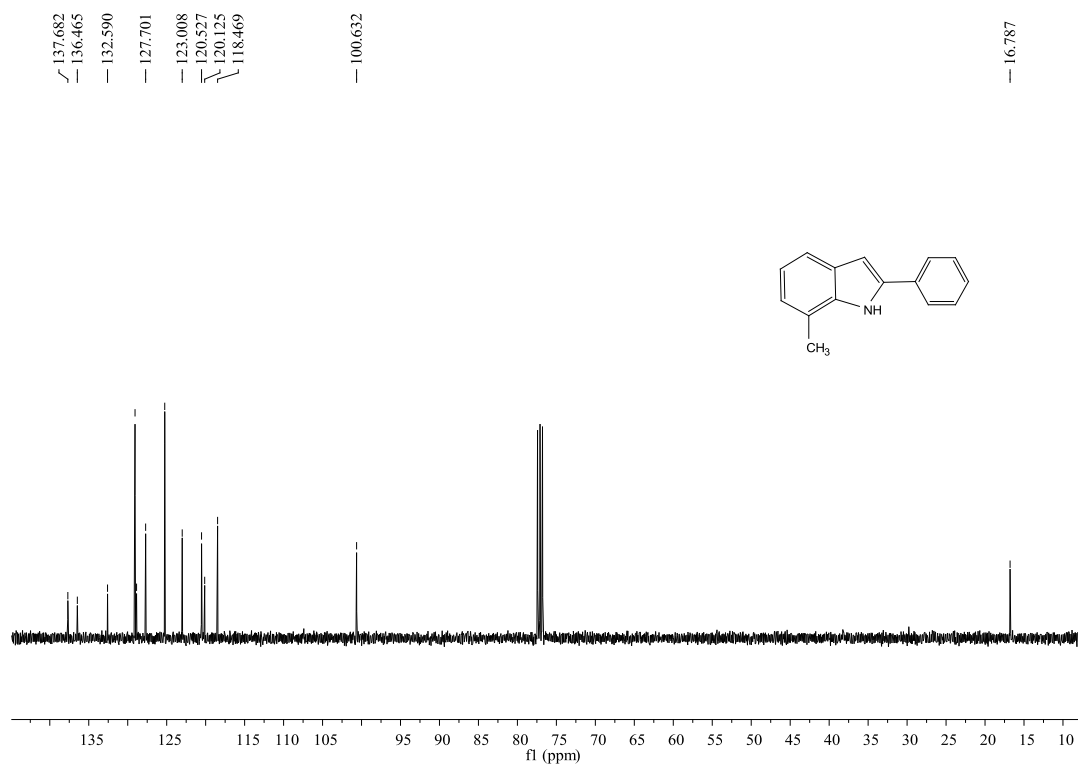

2) Ethyl 6-methyl-11H-benzo[a]carbazole-5-carboxylate (**3a**) (Using CDCl<sub>3</sub> as solvent)

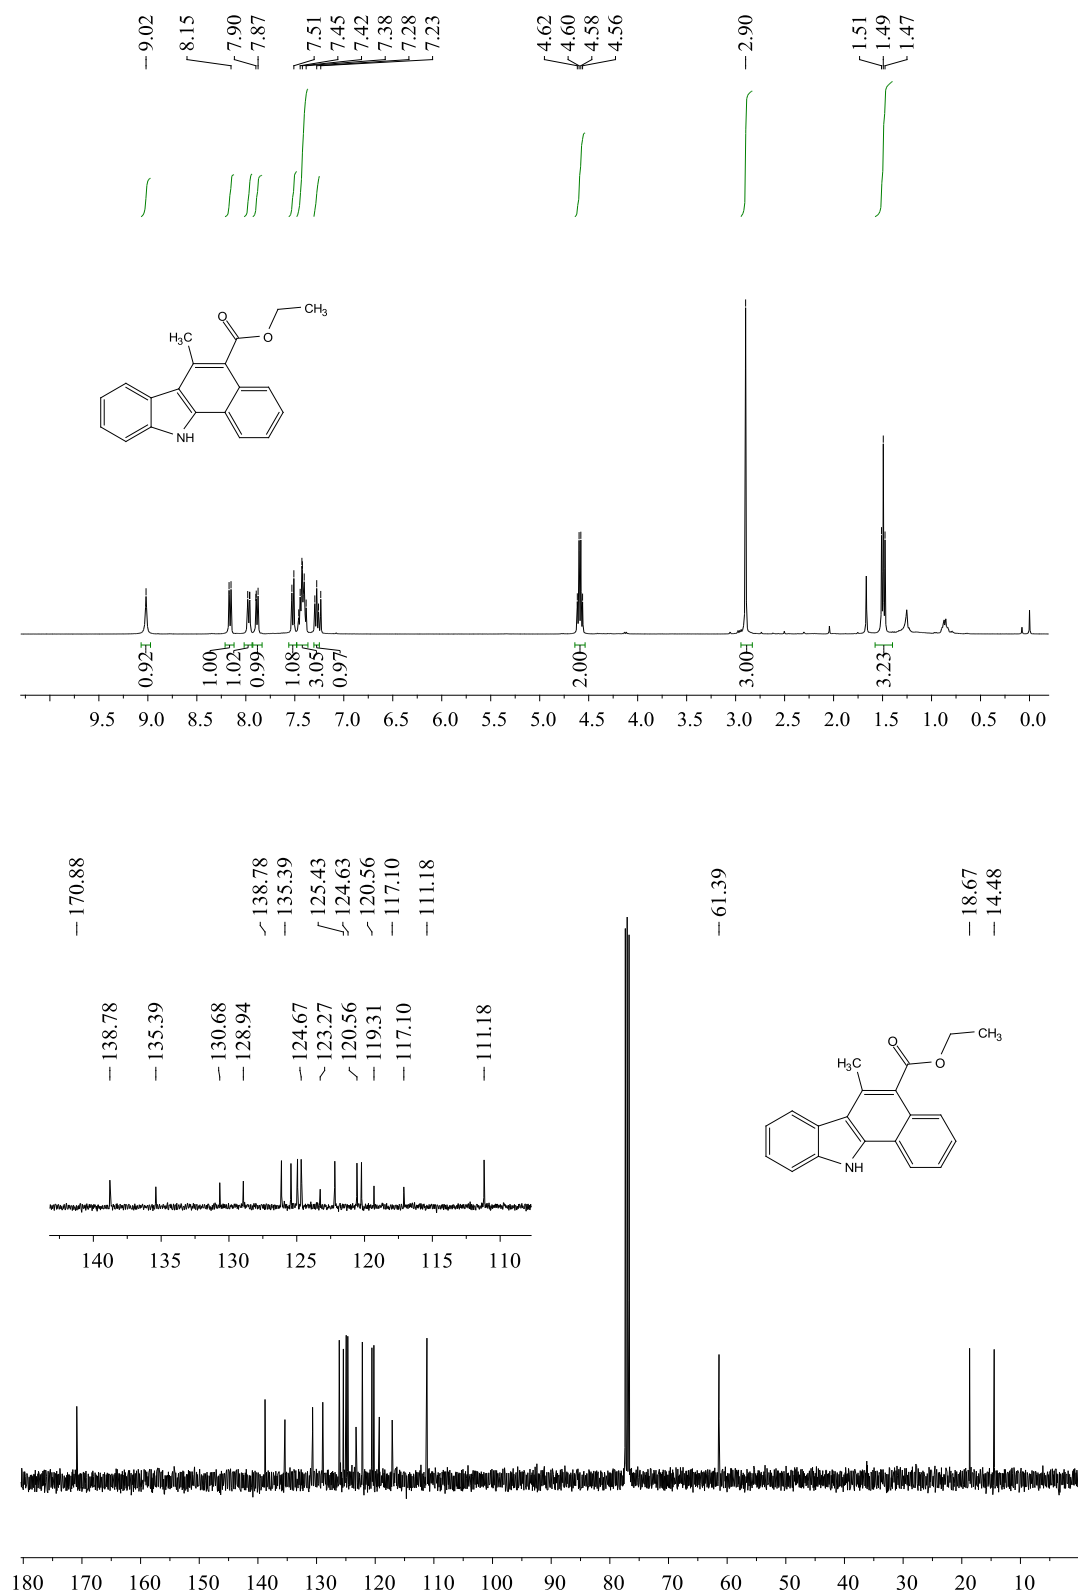

3) Ethyl 6,8-dimethyl-11H-benzo[a]carbazole-5-carboxylate (**3b**) (Using CDCl<sub>3</sub> as solvent)

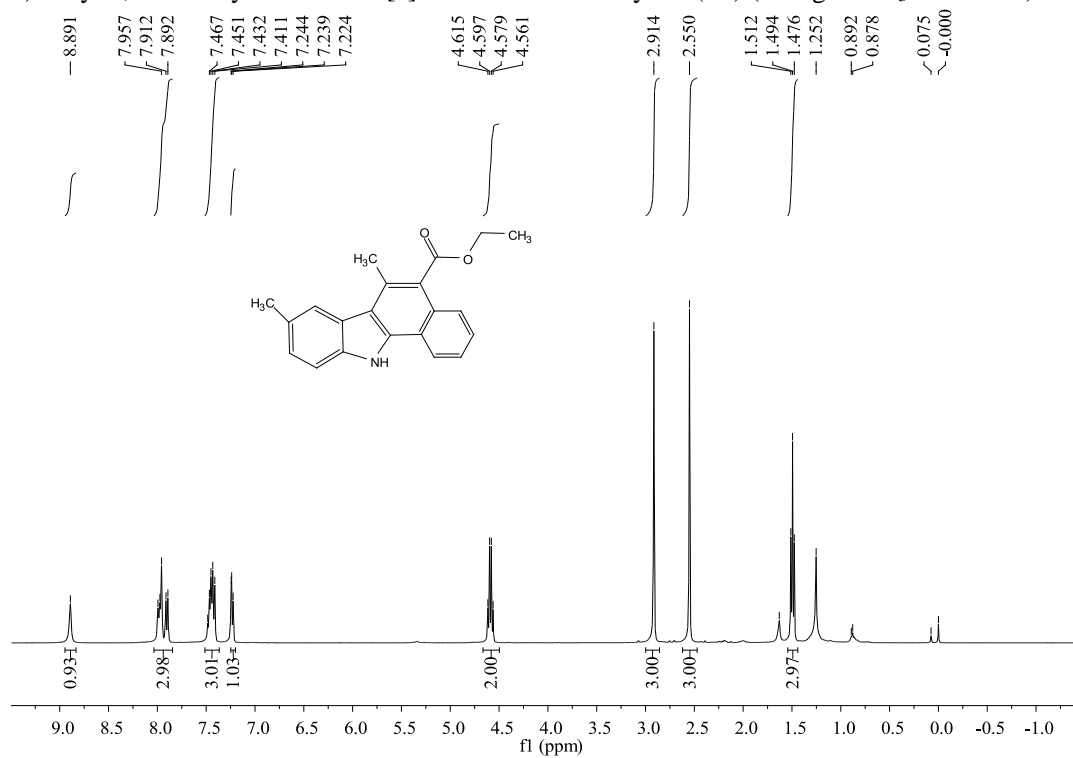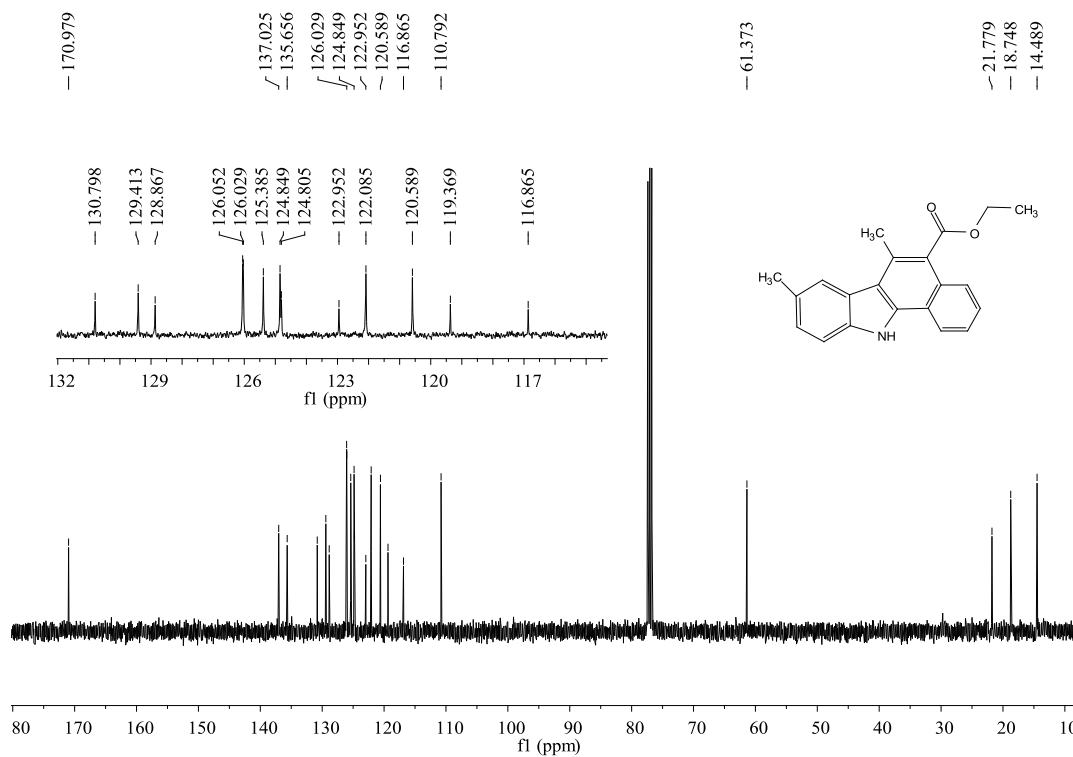

4) Ethyl 8-methoxy-6-methyl-11H-benzo[a]carbazole-5-carboxylate (**3c**) (Using CDCl<sub>3</sub> as solvent)

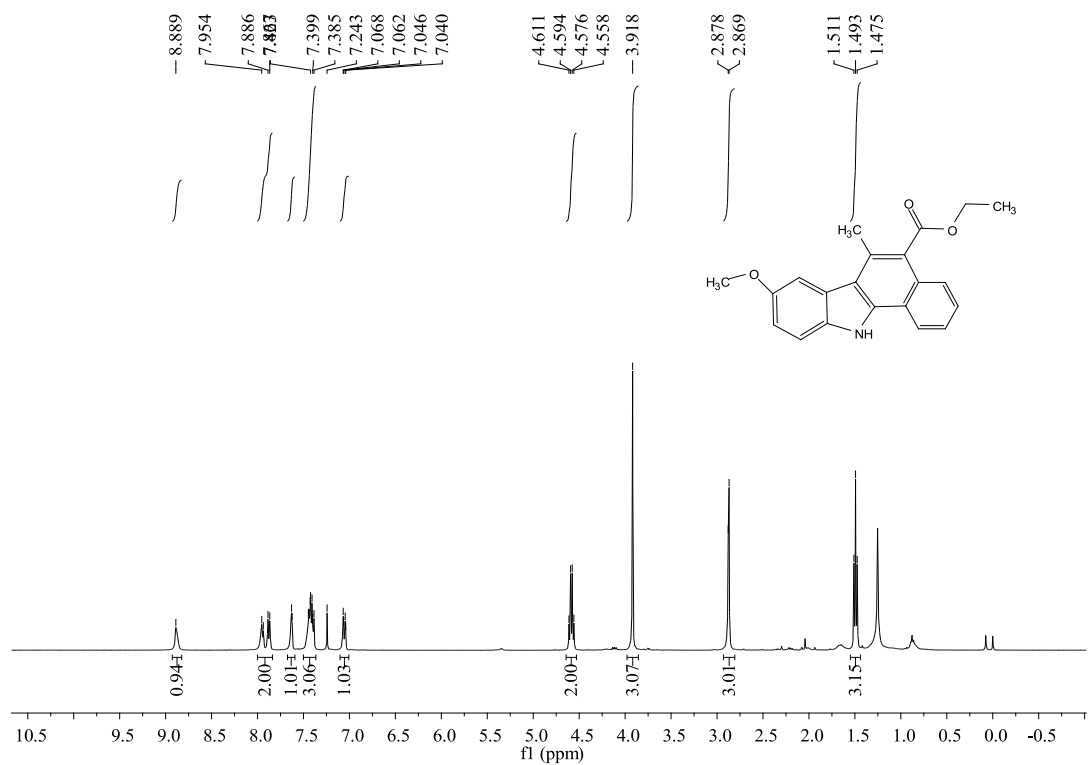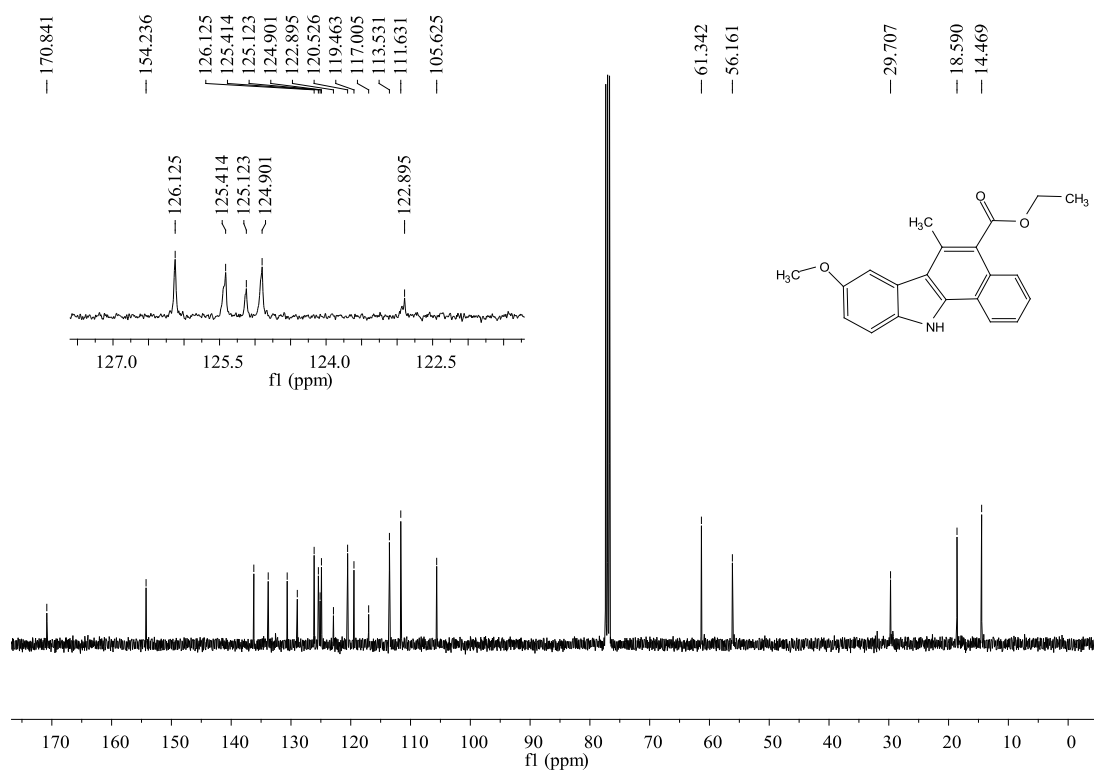

5) Ethyl 8-fluoro-6-methyl-1H-benzo[a]carbazole-5-carboxylate (**3d**) (Using CDCl<sub>3</sub> as solvent)

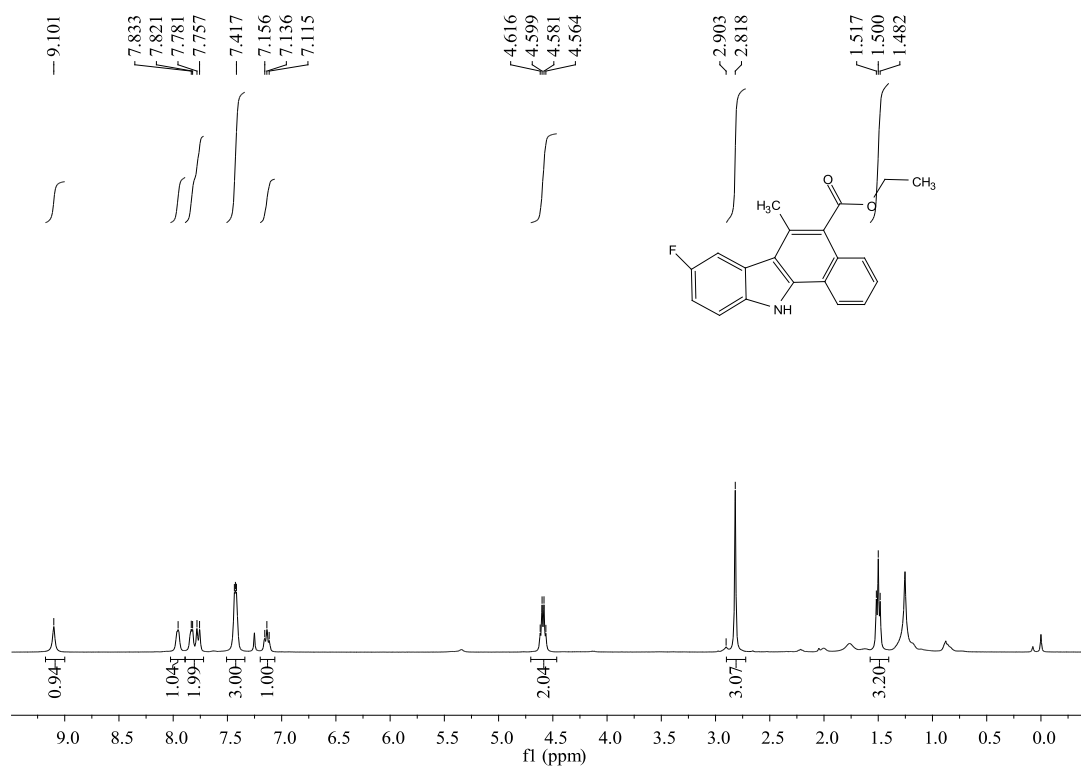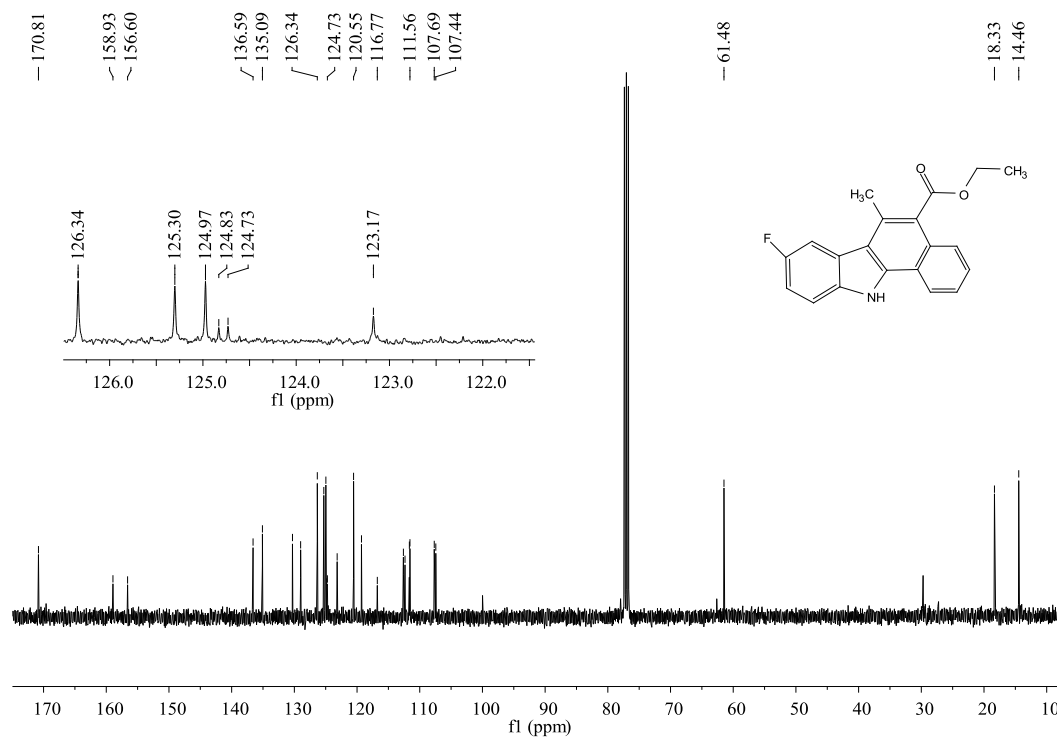



6) Ethyl 8-chloro-6-methyl-11H-benzo[a]carbazole-5-carboxylate (**3e**) (Using CDCl<sub>3</sub> as solvent)

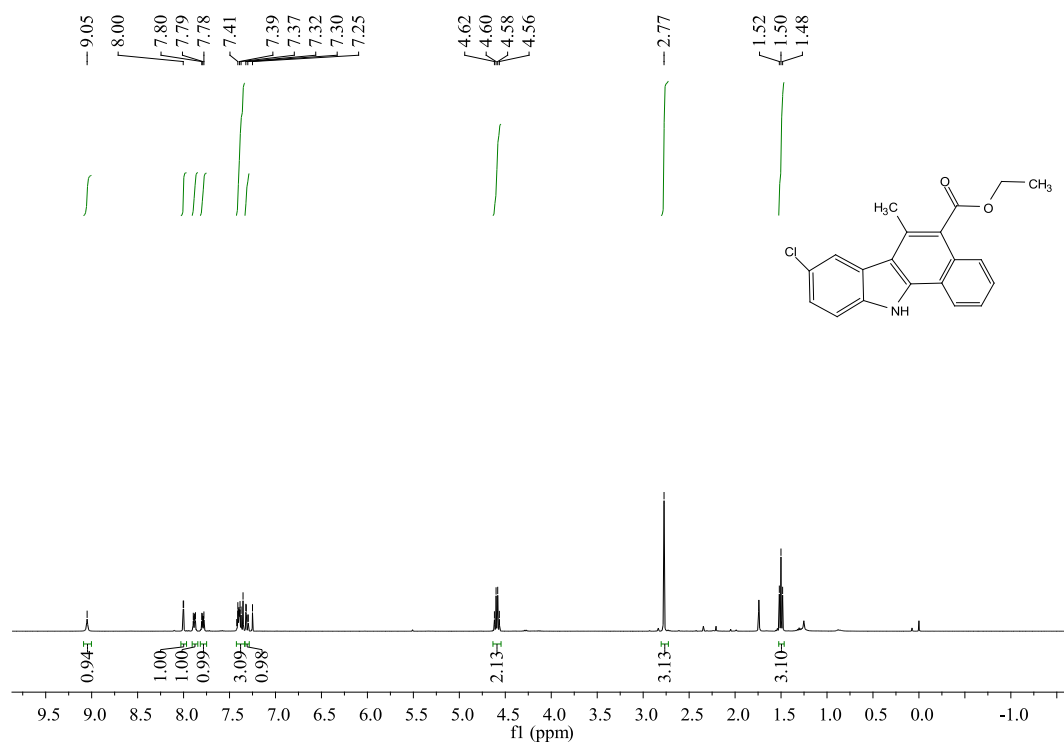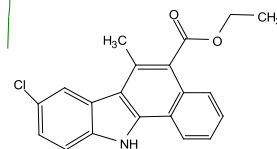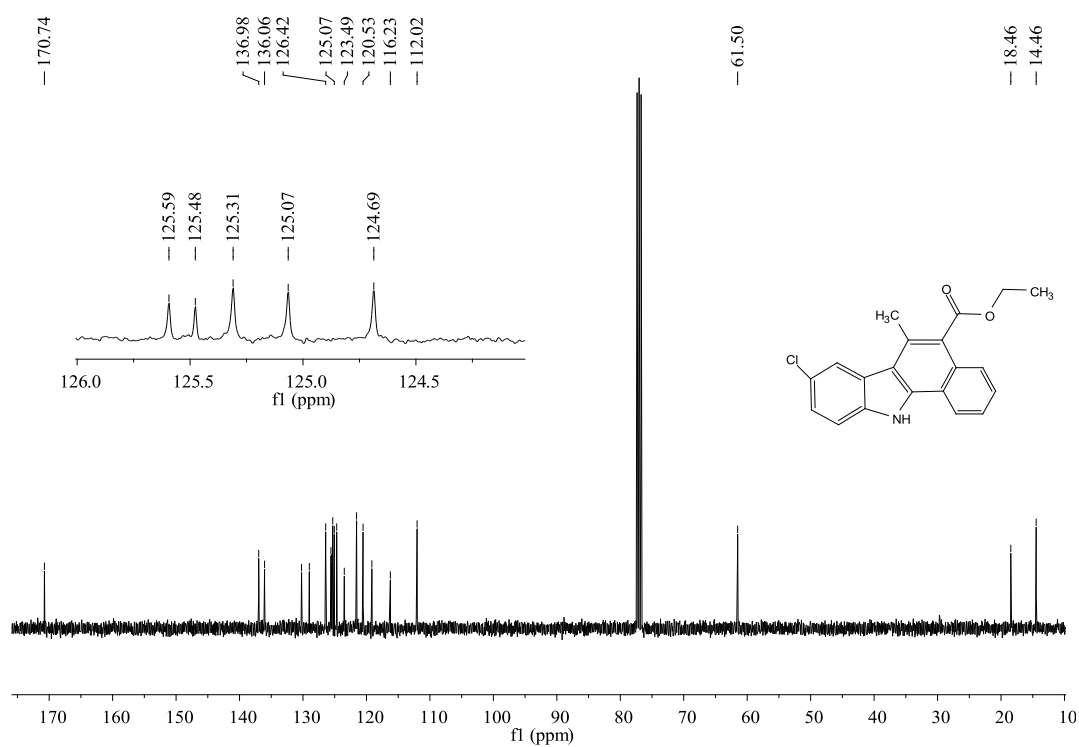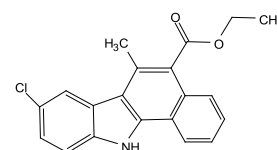

7) Diethyl 6-methyl-11H-benzo[a]carbazole-5,8-dicarboxylate (**3f**) (Using  $(\text{CD}_3)_2\text{CO}$  as solvent)

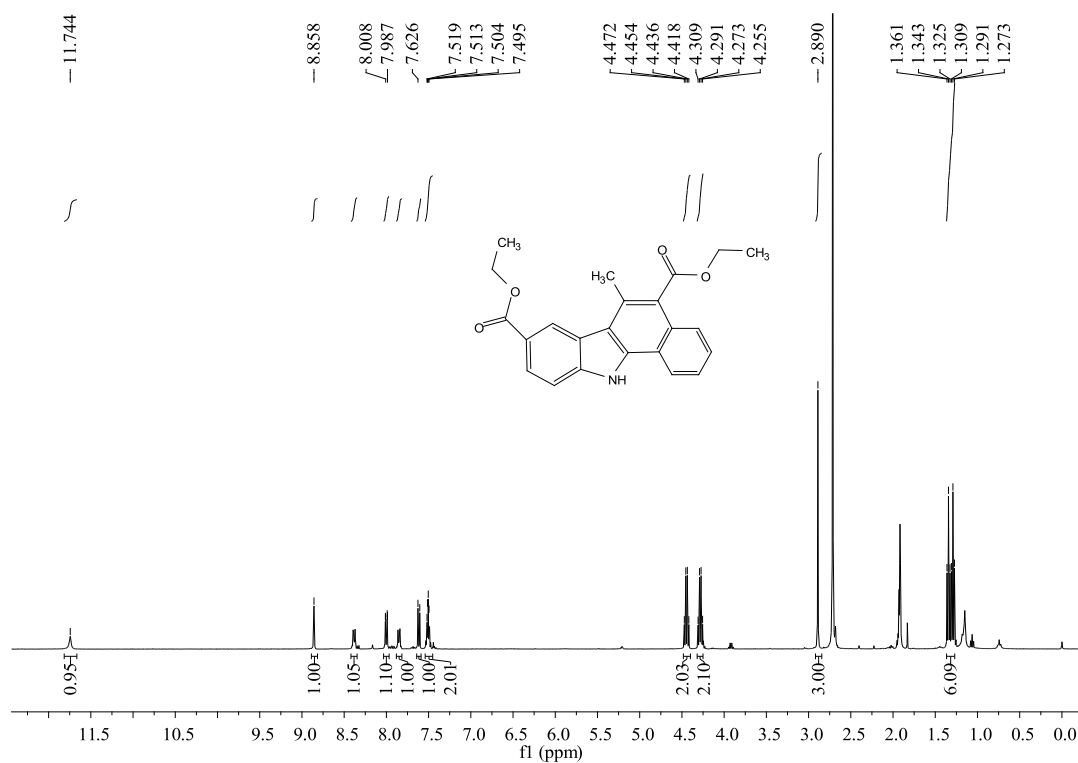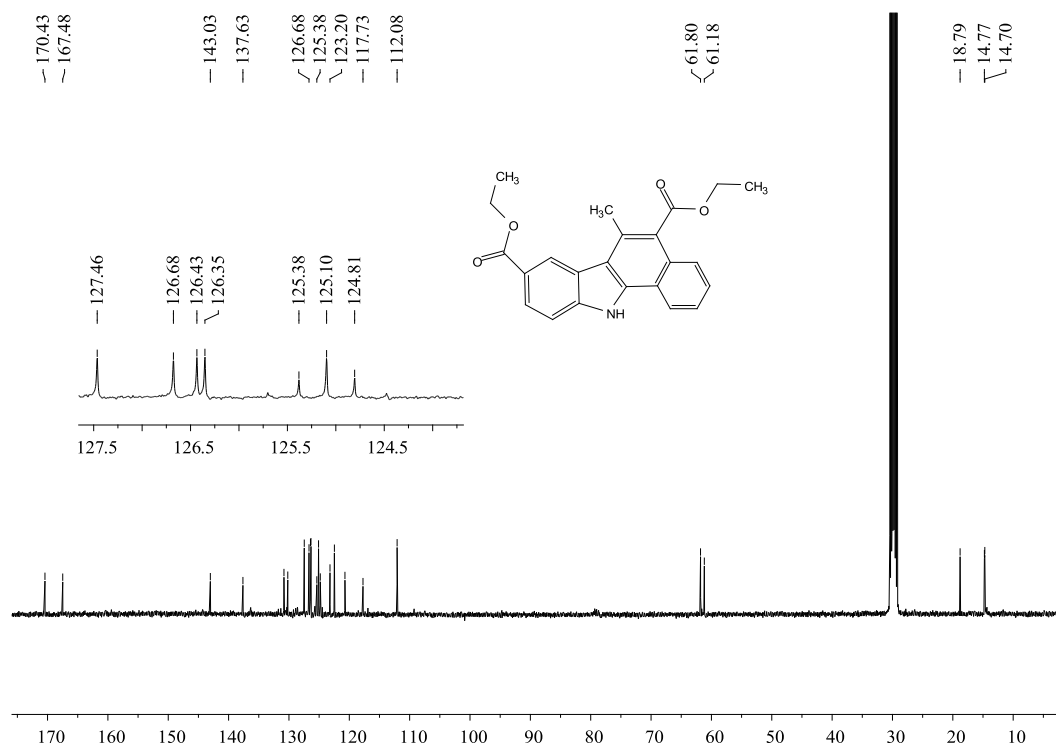

8) Ethyl 8-cyano-6-methyl-11H-benzo[a]carbazole-5-carboxylate (**3g**) (Using CDCl<sub>3</sub> as solvent)

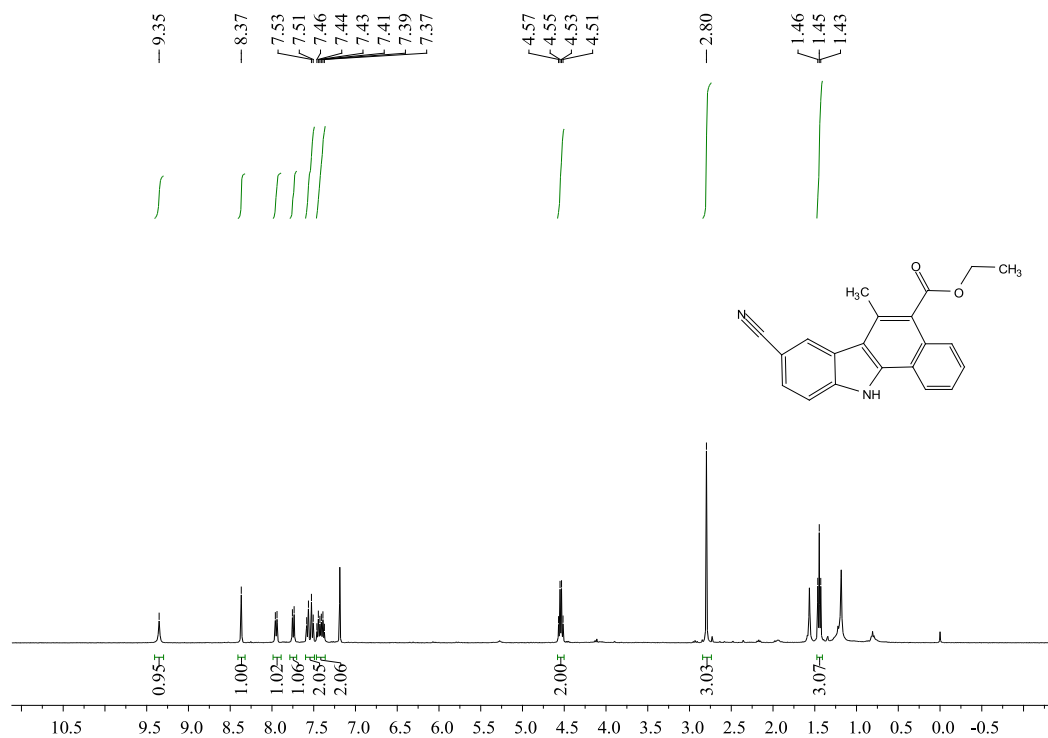

Ethyl 8-cyano-6-methyl-11H-benzo[a]carbazole-5-carboxylate (**3g**) (Using (CD<sub>3</sub>)<sub>2</sub>CO as solvent)

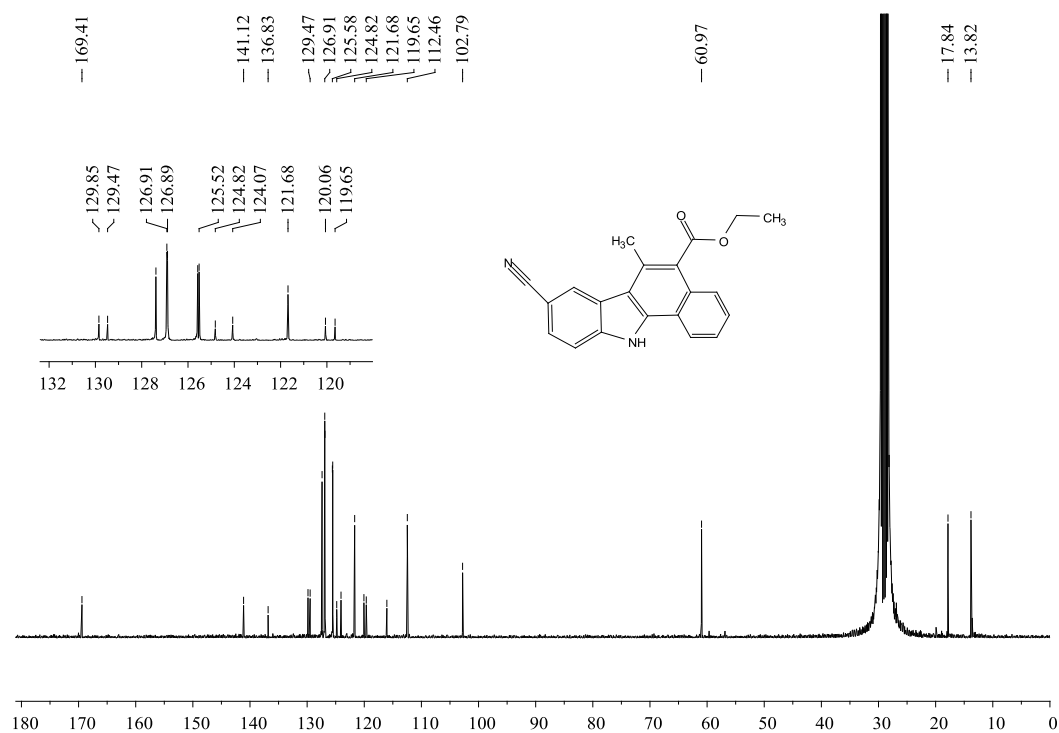

9) Ethyl 6,9-dimethyl-11H-benzo[a]carbazole-5-carboxylate (**3h**) (Using CDCl<sub>3</sub> as solvent)

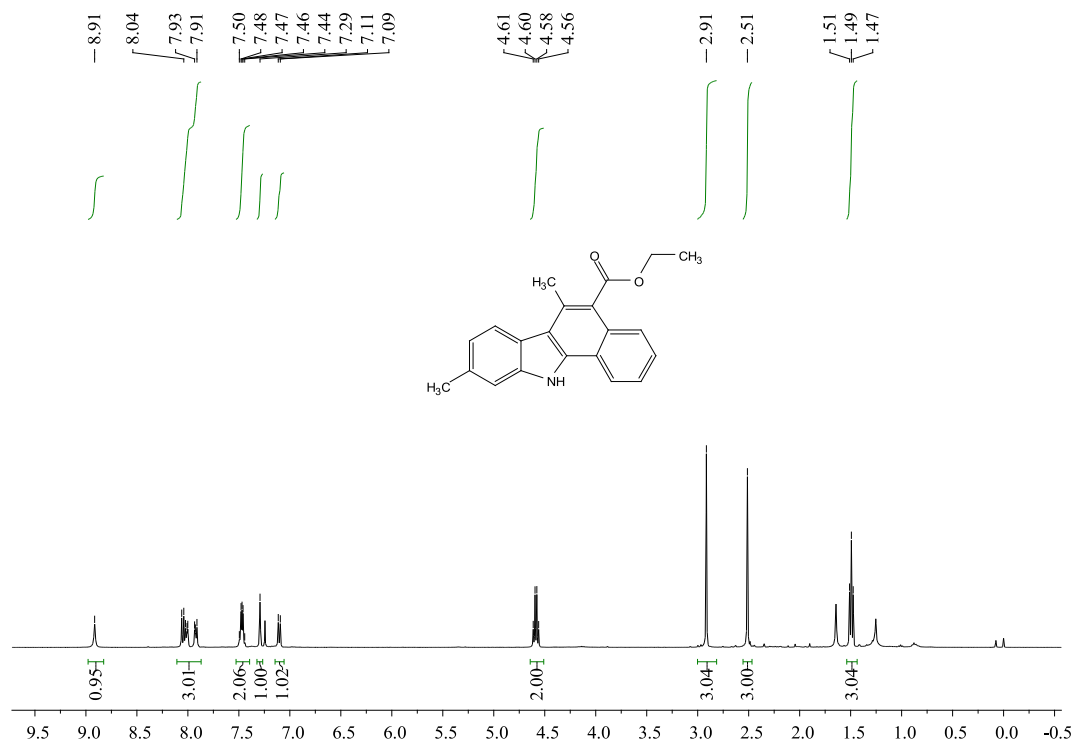

Ethyl 6,9-dimethyl-11H-benzo[a]carbazole-5-carboxylate (**3h**) (Using CD<sub>3</sub>COCD<sub>3</sub> as solvent)

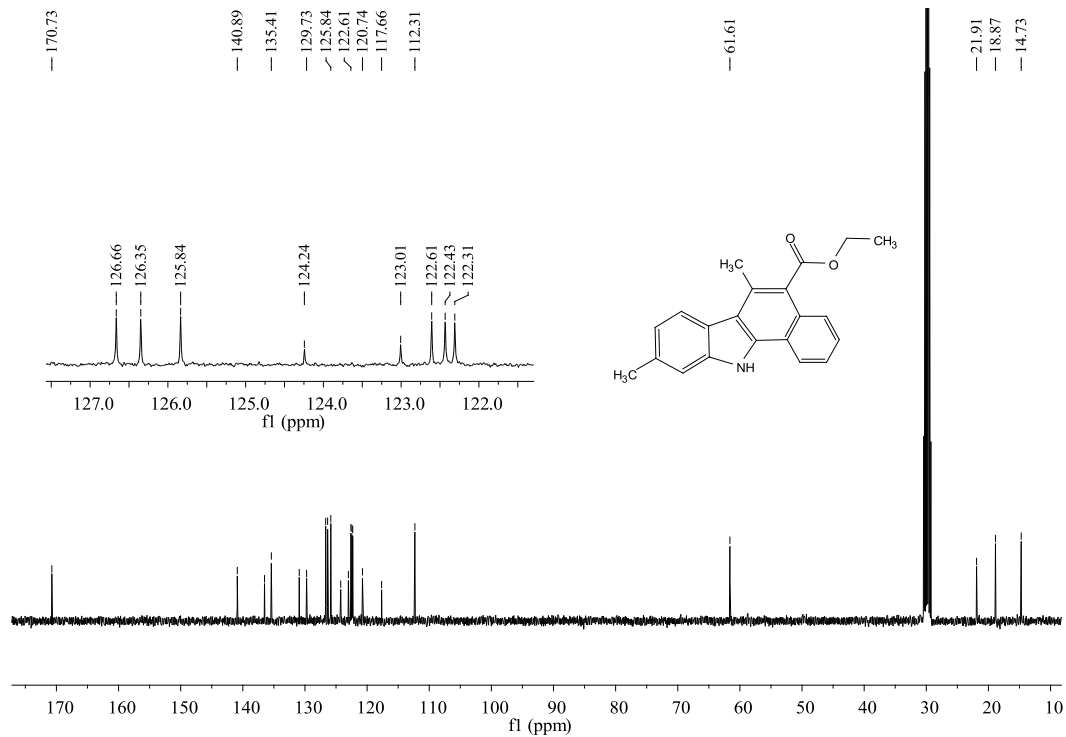

10) Ethyl 9-bromo-6-methyl-11H-benzo[a]carbazole-5-carboxylate (**3i**) (Using CDCl<sub>3</sub> as solvent)

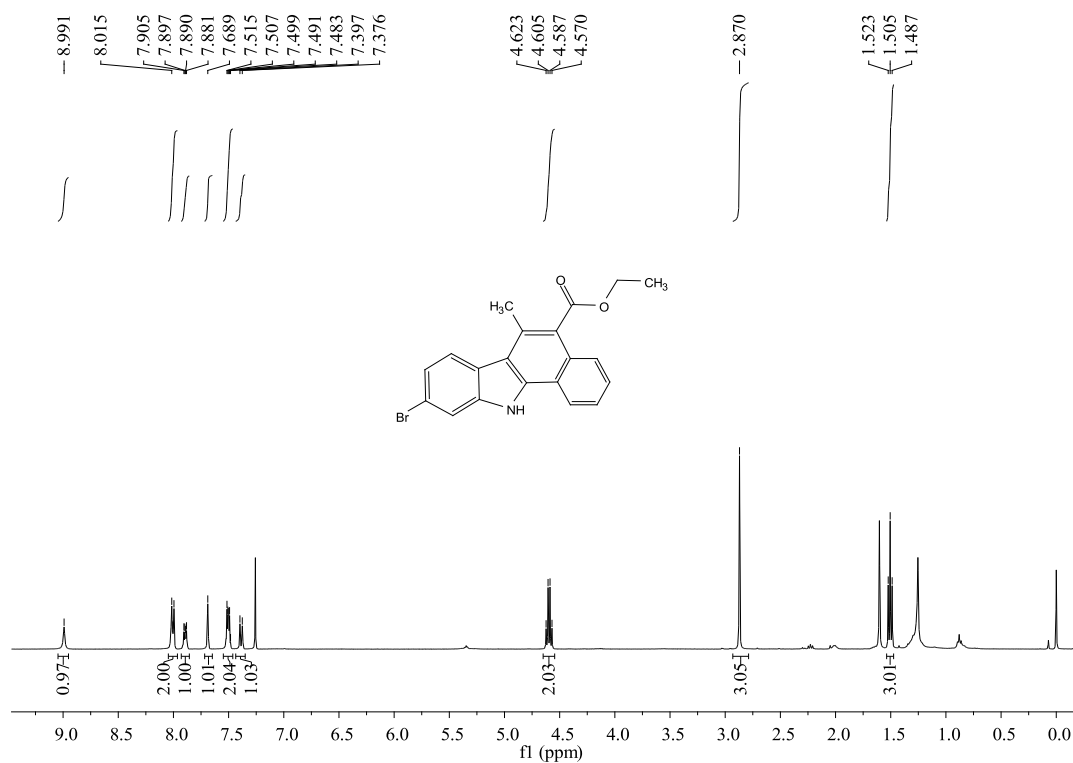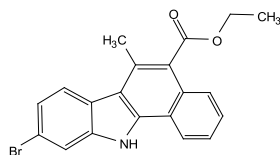

Ethyl 9-bromo-6-methyl-11H-benzo[a]carbazole-5-carboxylate (**3i**) (Using (CD<sub>3</sub>)<sub>2</sub>SO as solvent)

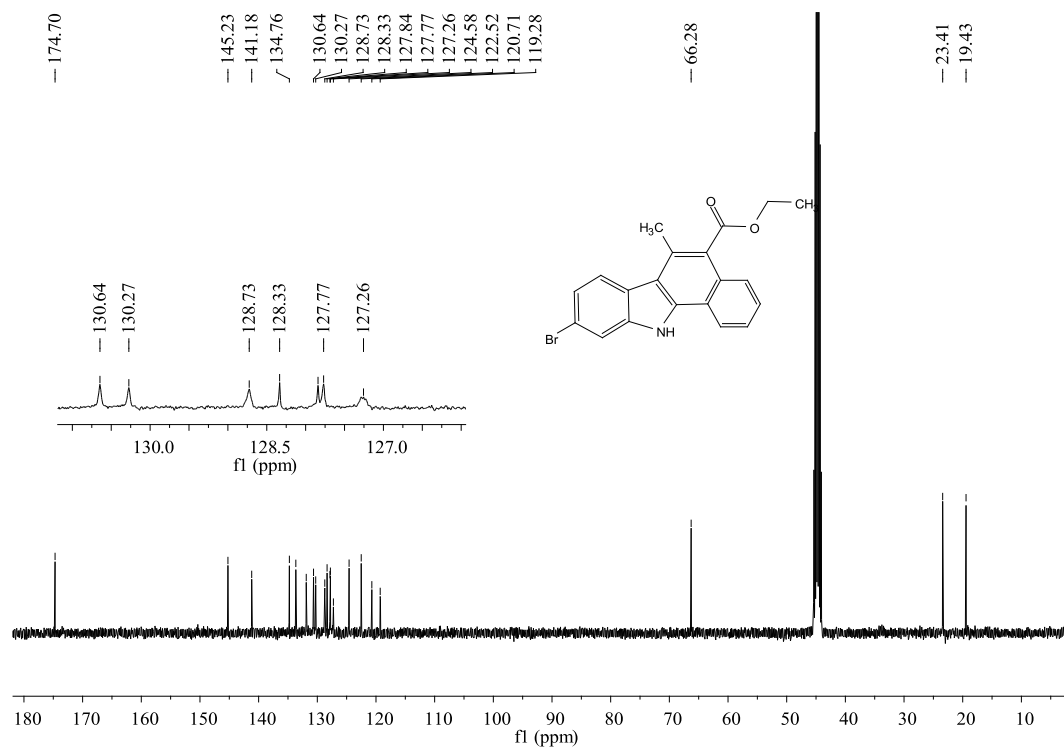

11) Ethyl 6-methyl-9-(trifluoromethyl)-11H-benzo[a]carbazole-5-carboxylate (**3j**) (Using  $\text{CDCl}_3$  as solvent)

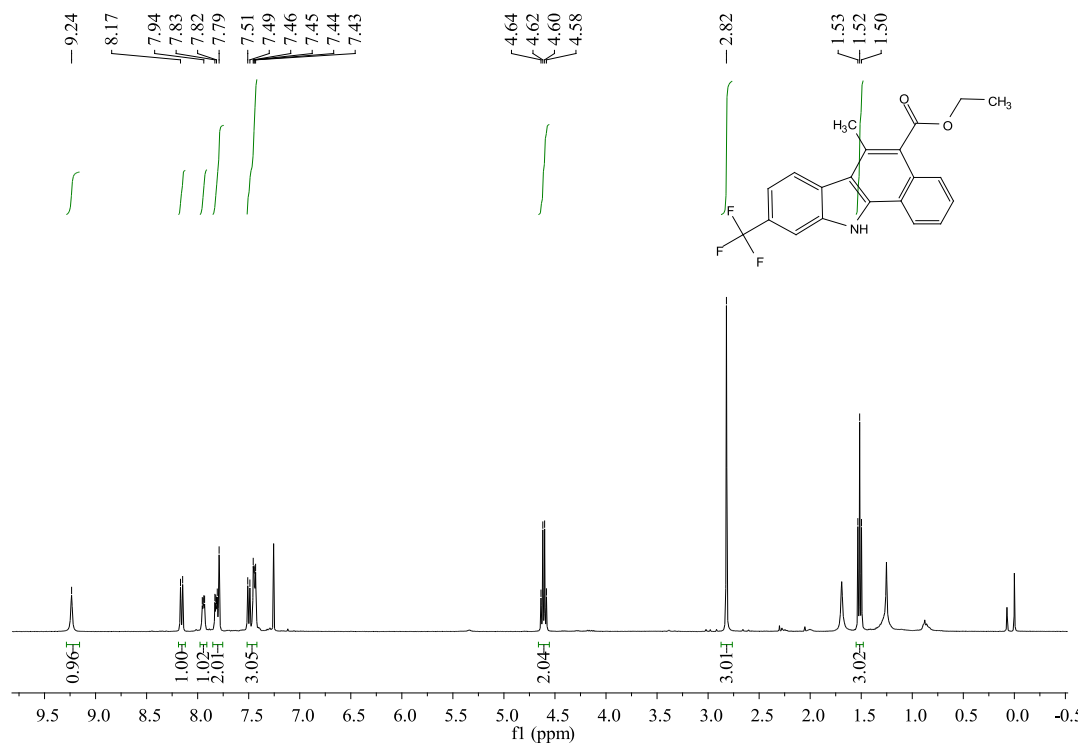

Ethyl 6-methyl-9-(trifluoromethyl)-11H-benzo[a]carbazole-5-carboxylate (**3j**) (Using  $(\text{CD}_3)_2\text{SO}$  as solvent)

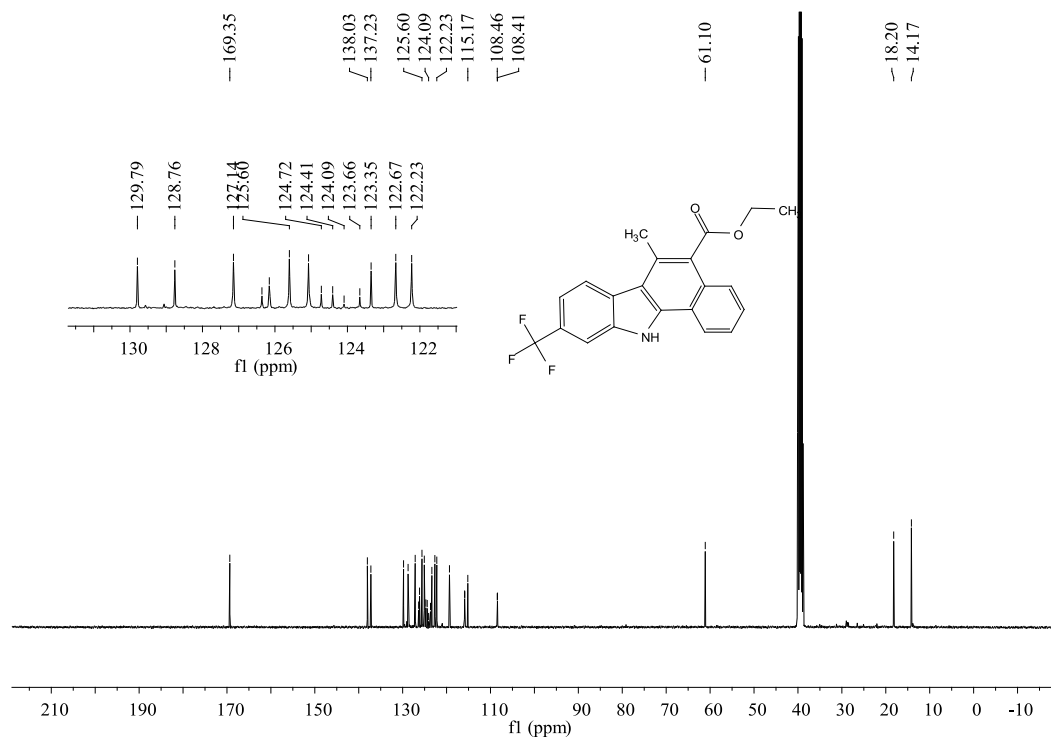

12) Ethyl 3,6-dimethyl-11H-benzo[a]carbazole-5-carboxylate (**31**) (Using CDCl<sub>3</sub> as solvent)

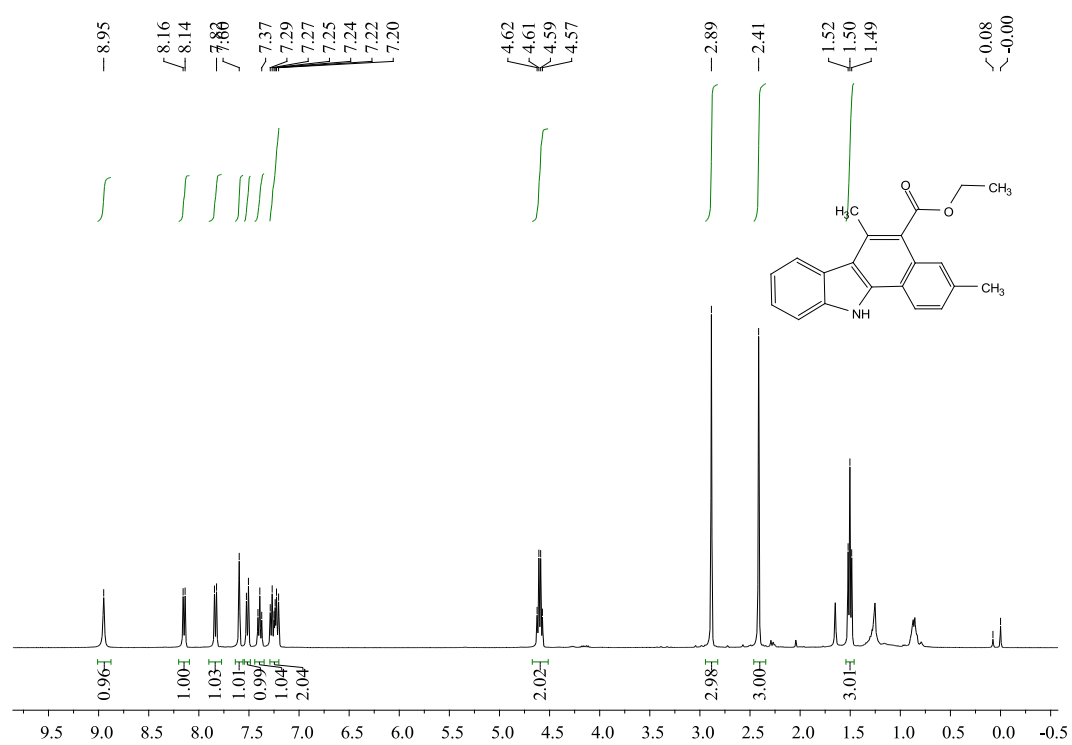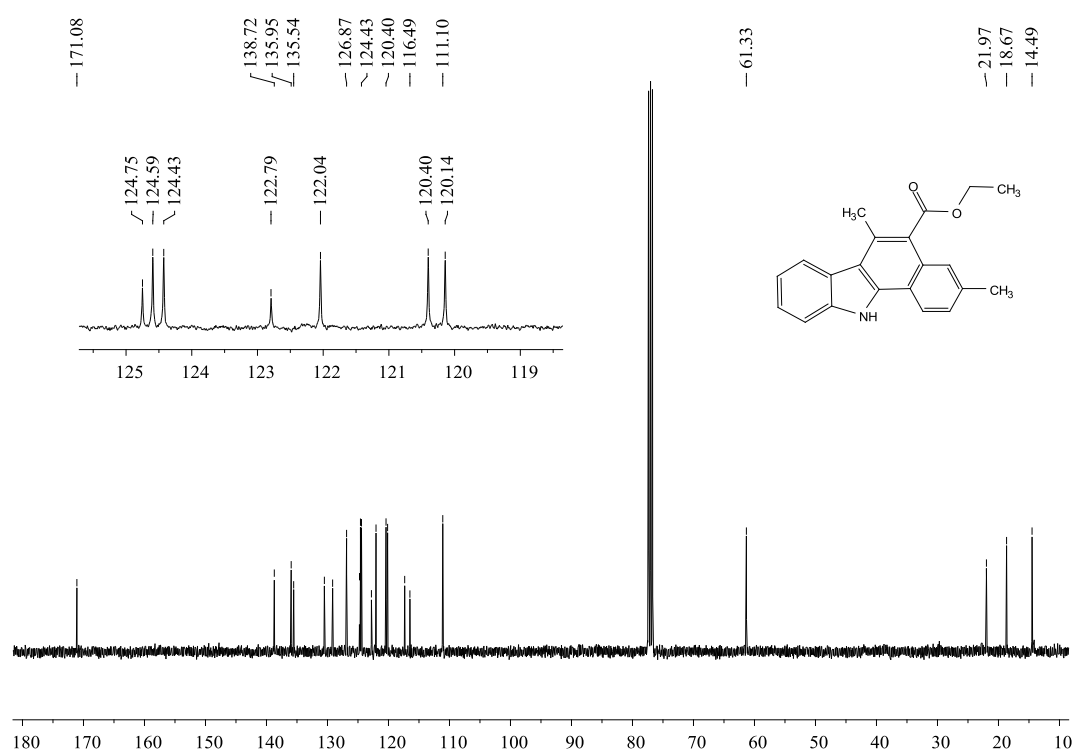

13) Ethyl 3-isobutyl-6-methyl-11H-benzo[a]carbazole-5-carboxylate (**3m**) (Using CDCl<sub>3</sub> as solvent)

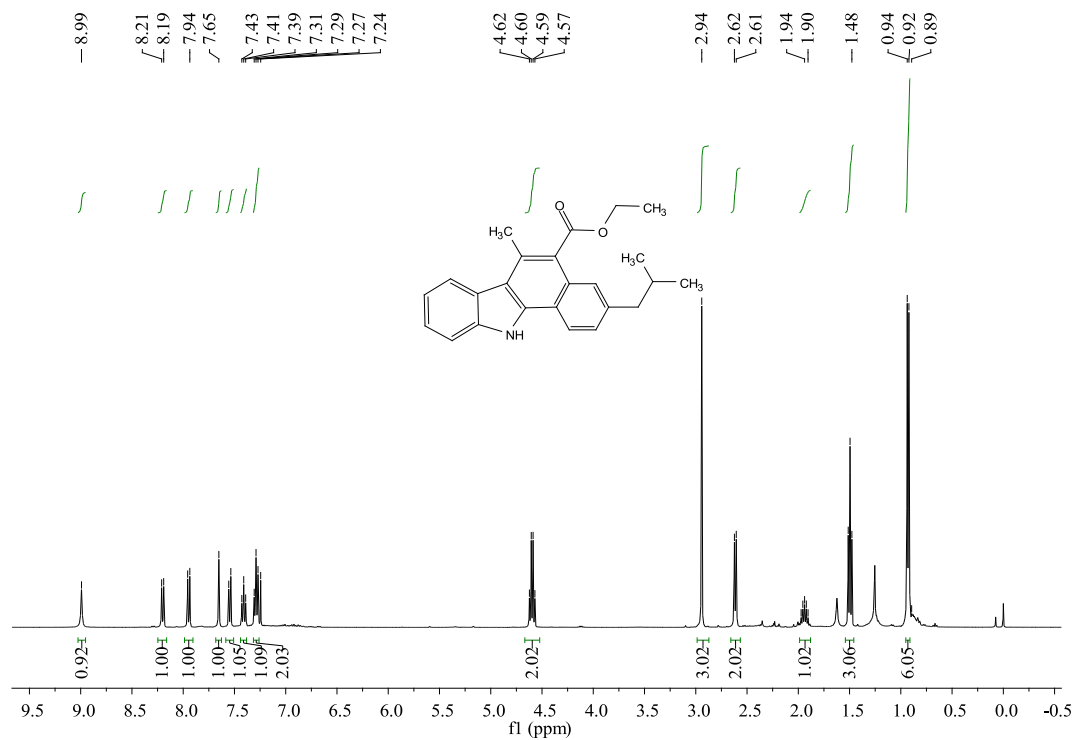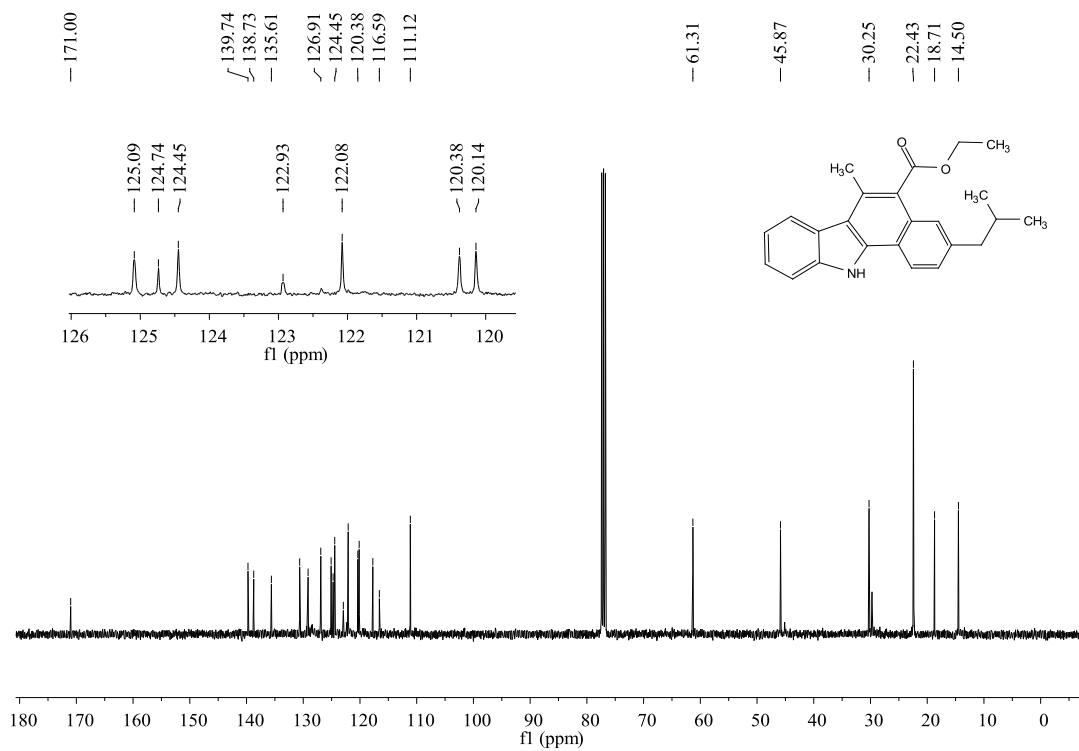



14) Ethyl 3-methoxy-6-methyl-11H-benzo[a]carbazole-5-carboxylate (**3n**) (Using CDCl<sub>3</sub> as solvent)

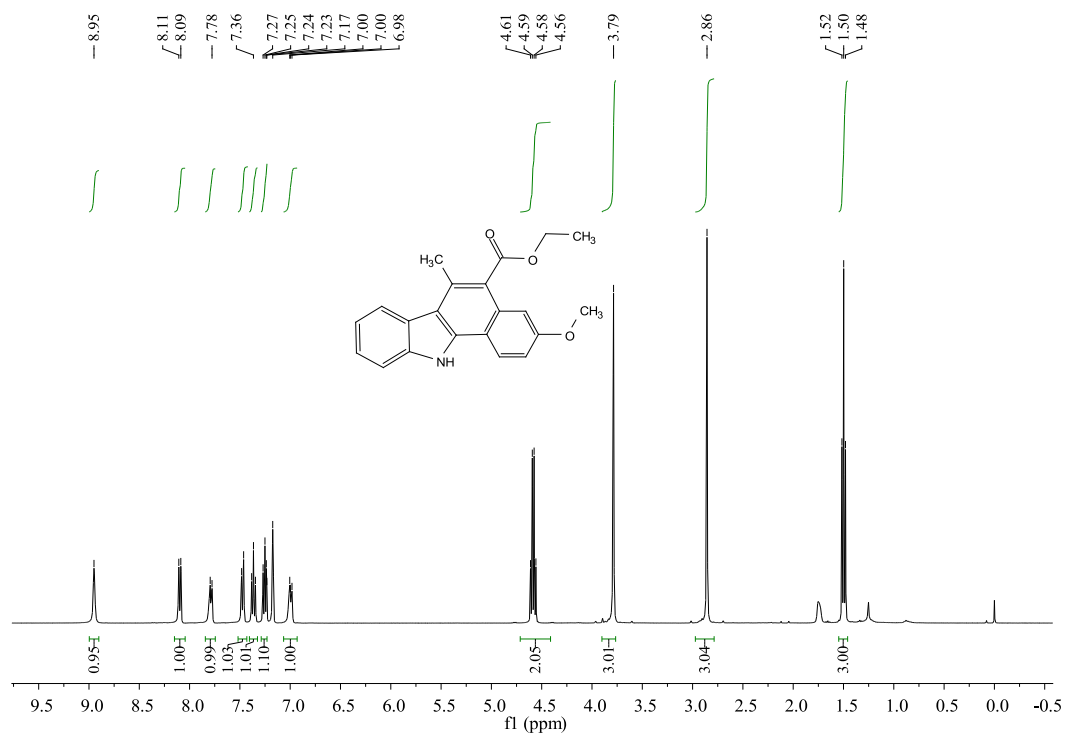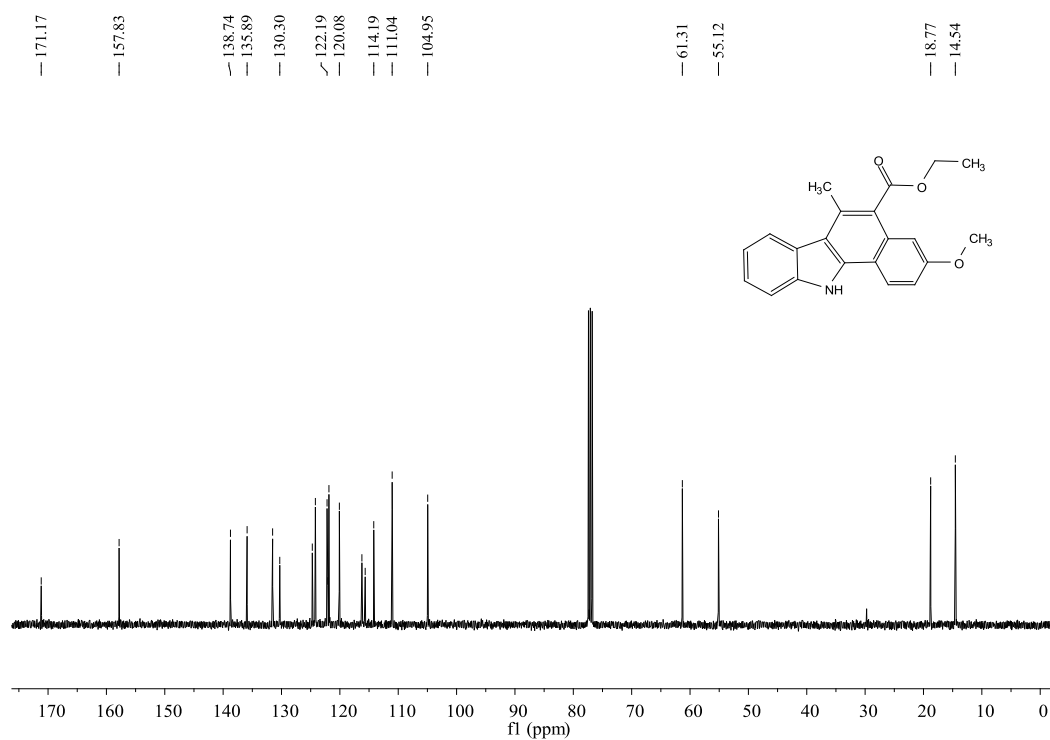

15) Ethyl 3-fluoro-6-methyl-11H-benzo[a]carbazole-5-carboxylate (**3o**) (Using CDCl<sub>3</sub> as solvent)

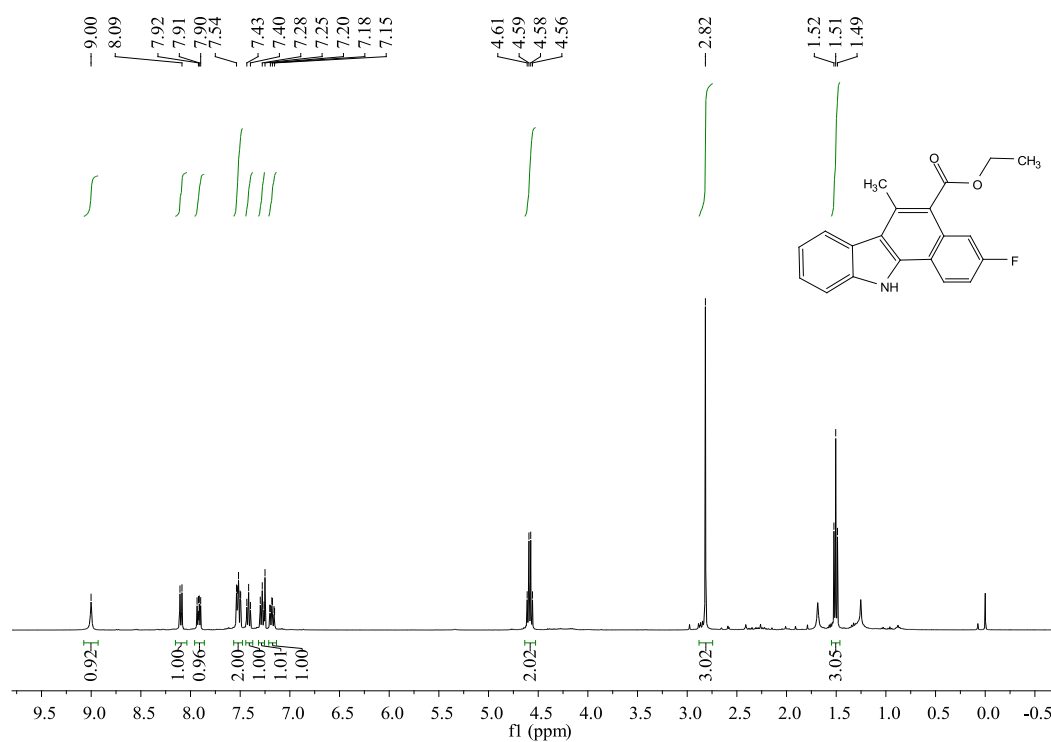

ethyl 3-fluoro-6-methyl-11H-benzo[a]carbazole-5-carboxylate (**3o**) (Using (CD<sub>3</sub>)<sub>2</sub>CO as solvent)

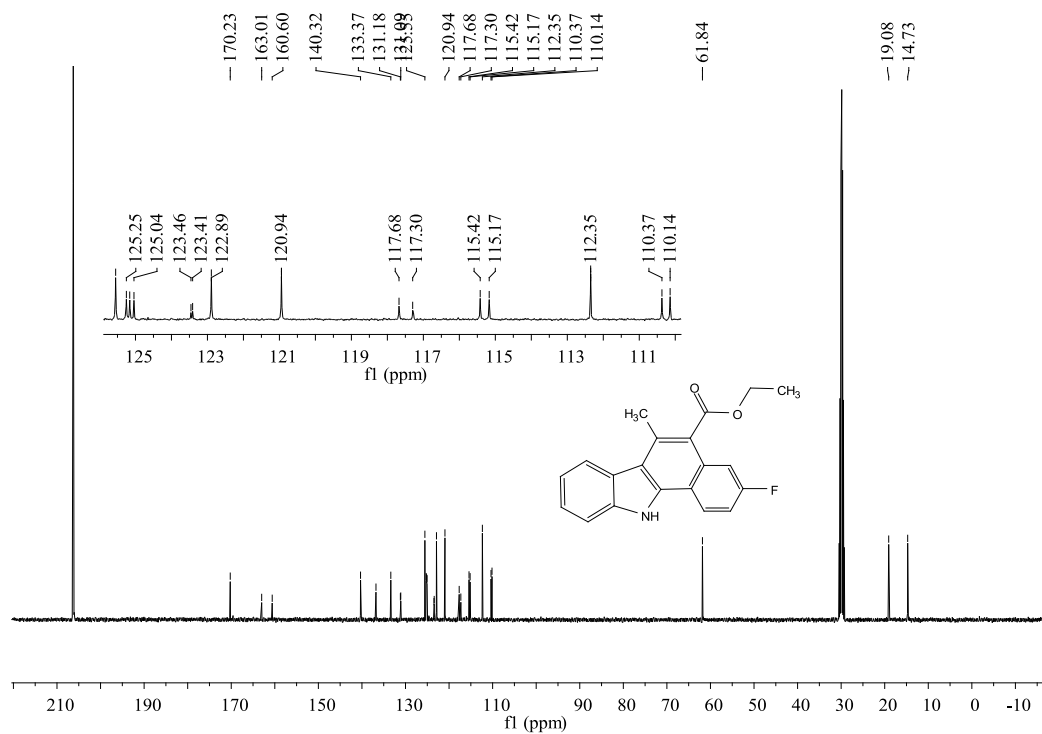

16) Ethyl 3-chloro-6-methyl-11H-benzo[a]carbazole-5-carboxylate (**3p**) (Using CDCl<sub>3</sub> as solvent)

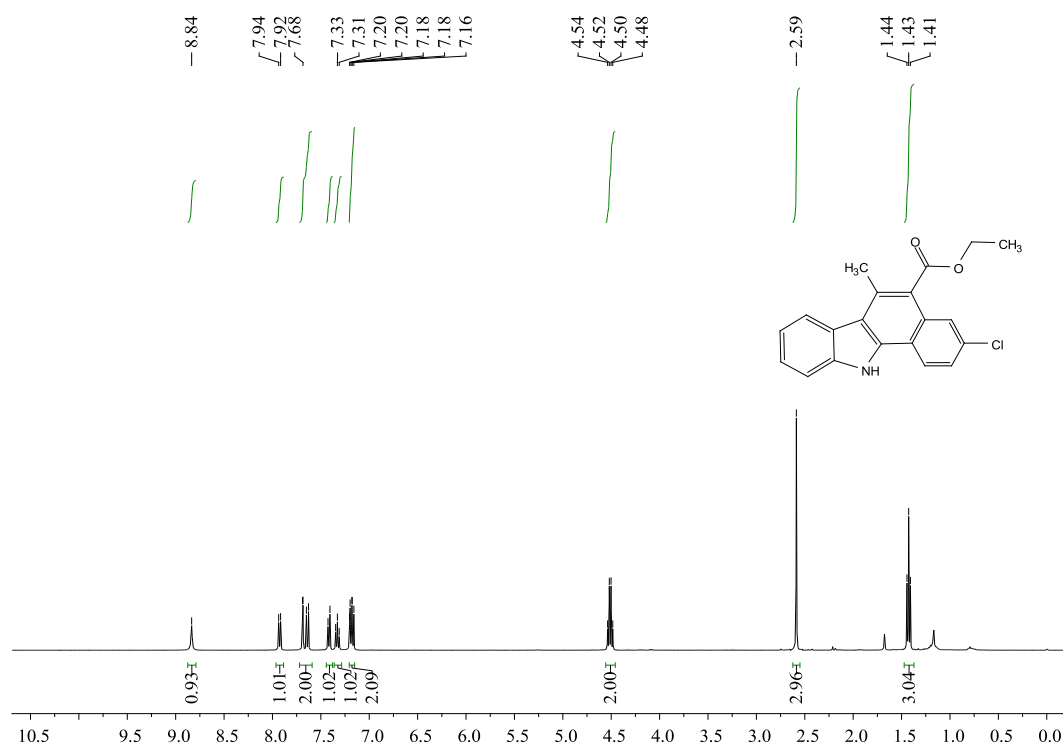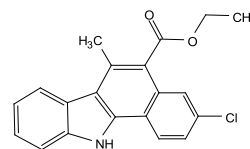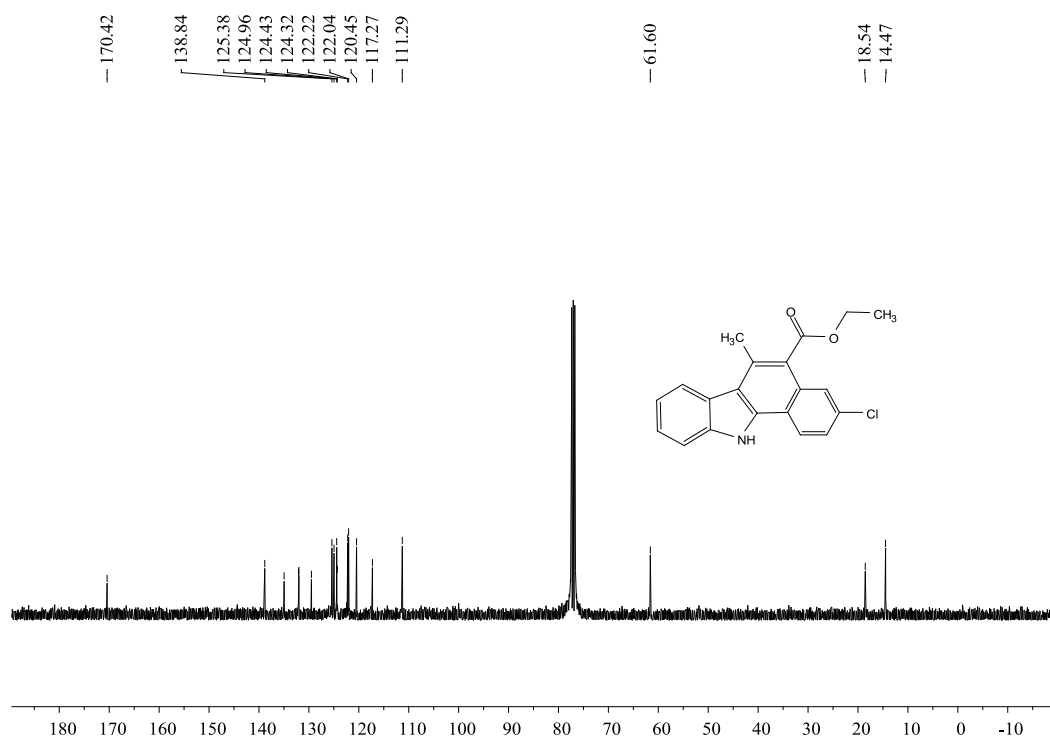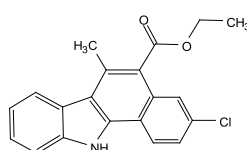

17) Ethyl 3-bromo-6-methyl-11H-benzo[a]carbazole-5-carboxylate (**3q**) (Using CDCl<sub>3</sub> as solvent)

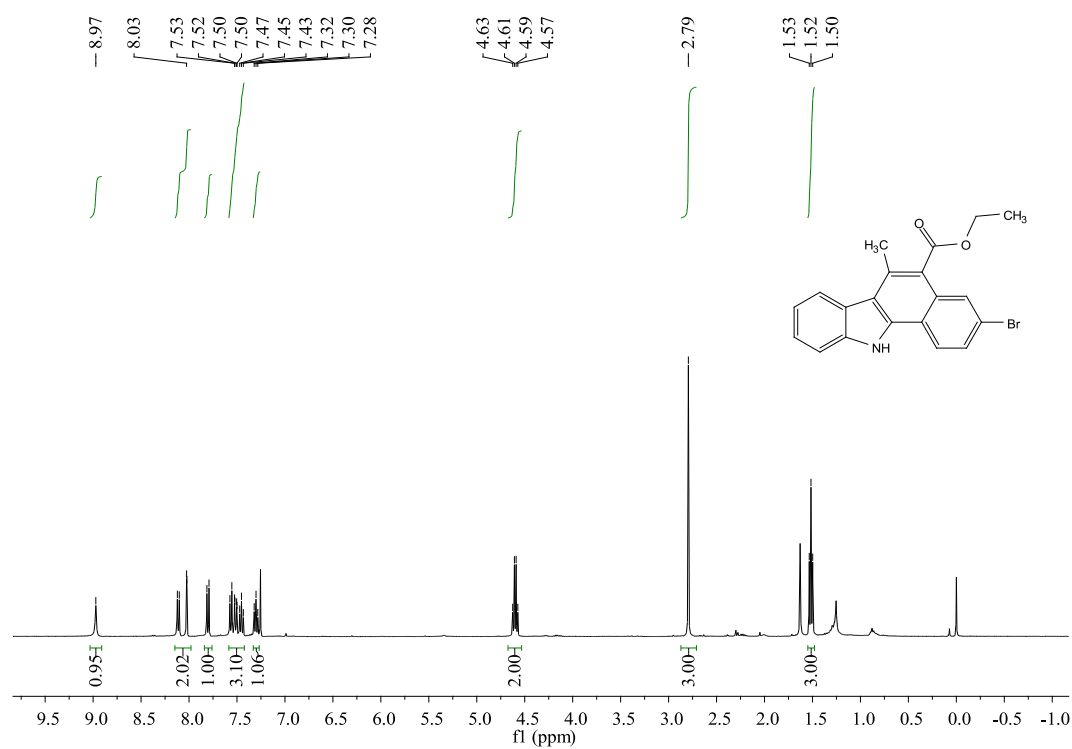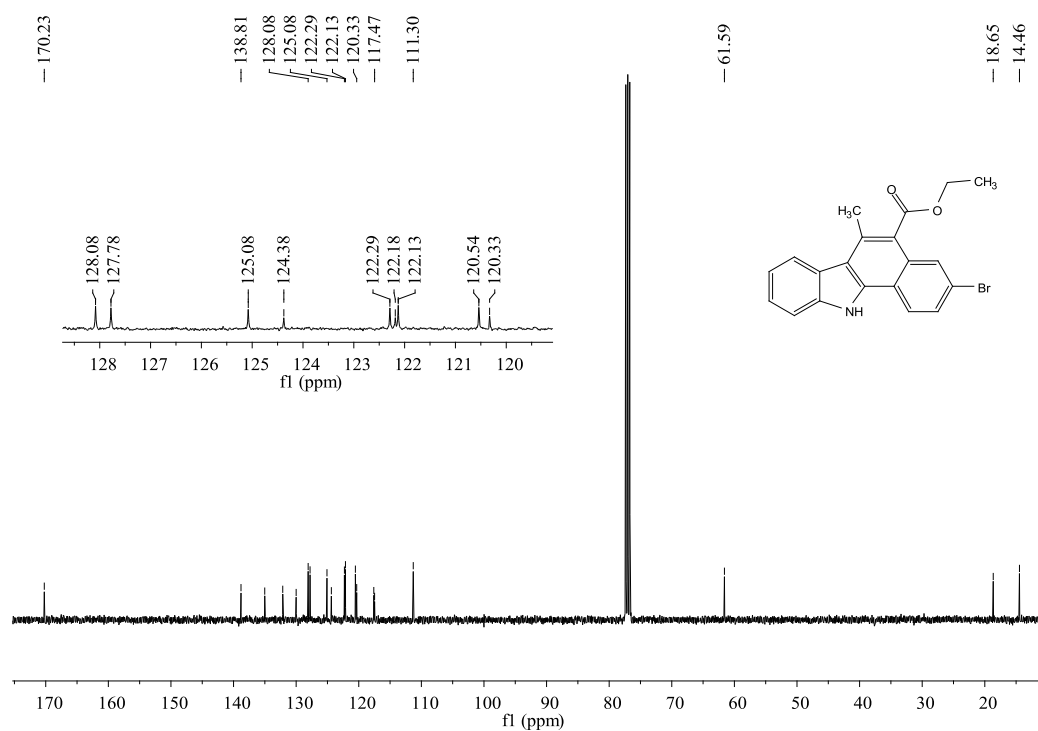

18) Ethyl 3-cyano-6-methyl-11H-benzo[*a*]carbazole-5-carboxylate (**3r**) (Using CDCl<sub>3</sub> as solvent)

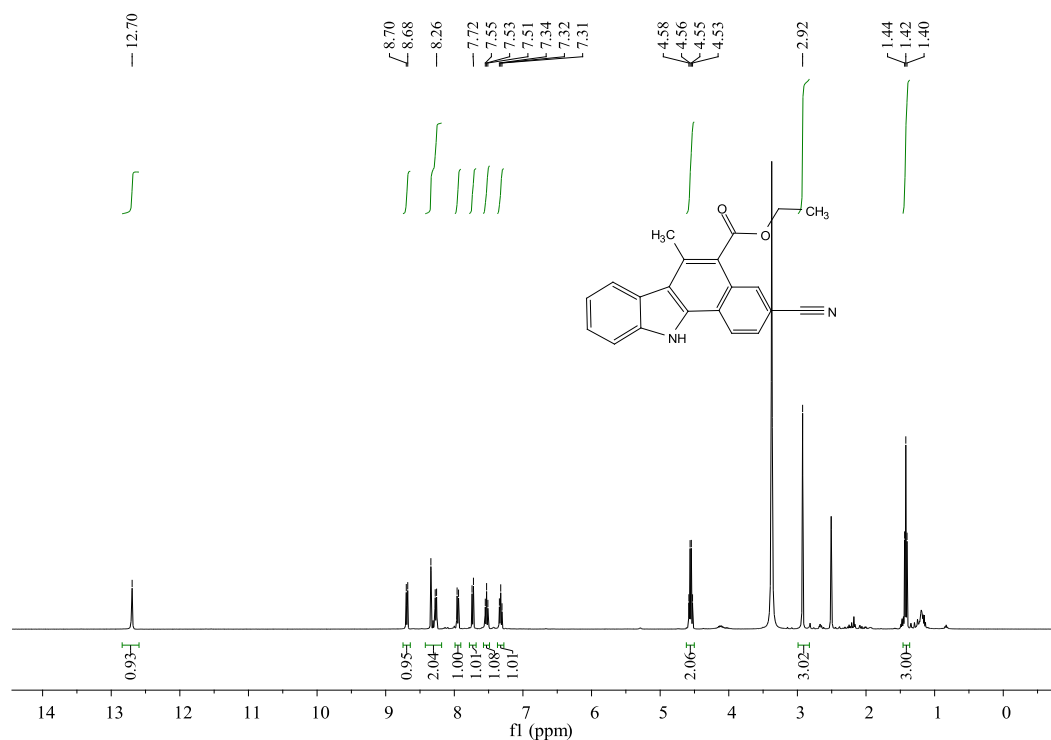

Ethyl 3-cyano-6-methyl-11H-benzo[*a*]carbazole-5-carboxylate (**3r**) (Using (CD<sub>3</sub>)<sub>2</sub>SO as solvent)

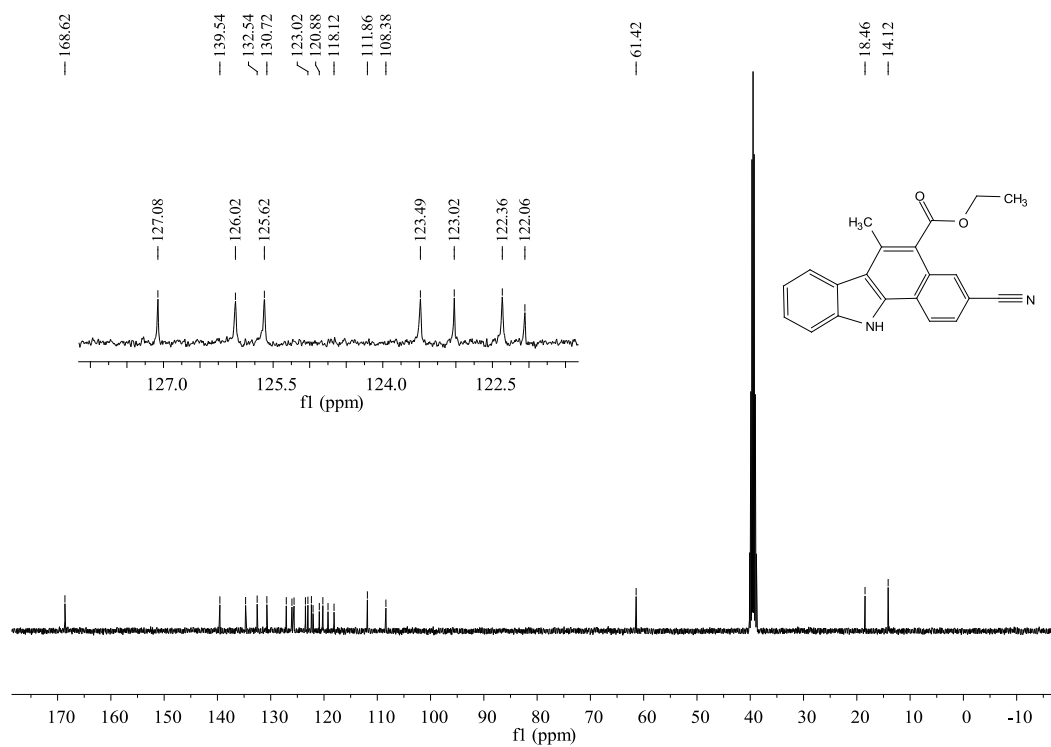

19) Ethyl 6-methyl-3-nitro-11H-benzo[*a*]carbazole-5-carboxylate (**3s**) (Using  $(\text{CD}_3)_2\text{SO}$  as solvent)

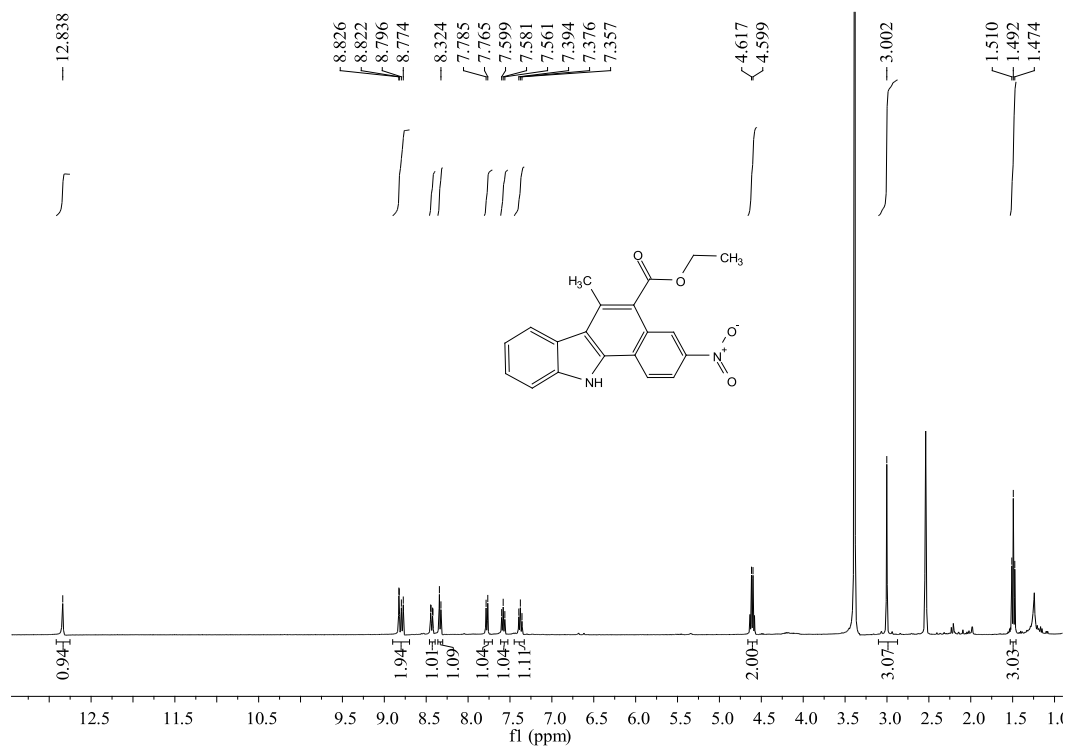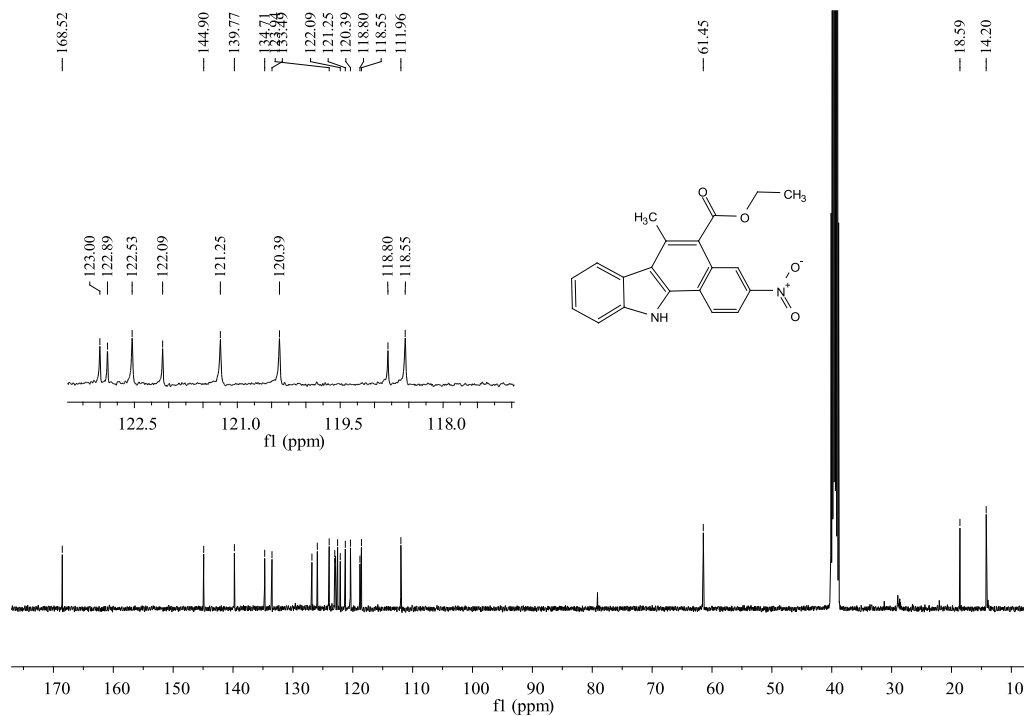

20) Ethyl 2-methoxy-6-methyl-11H-benzo[a]carbazole-5-carboxylate (**3t**) (Using CDCl<sub>3</sub> as solvent)

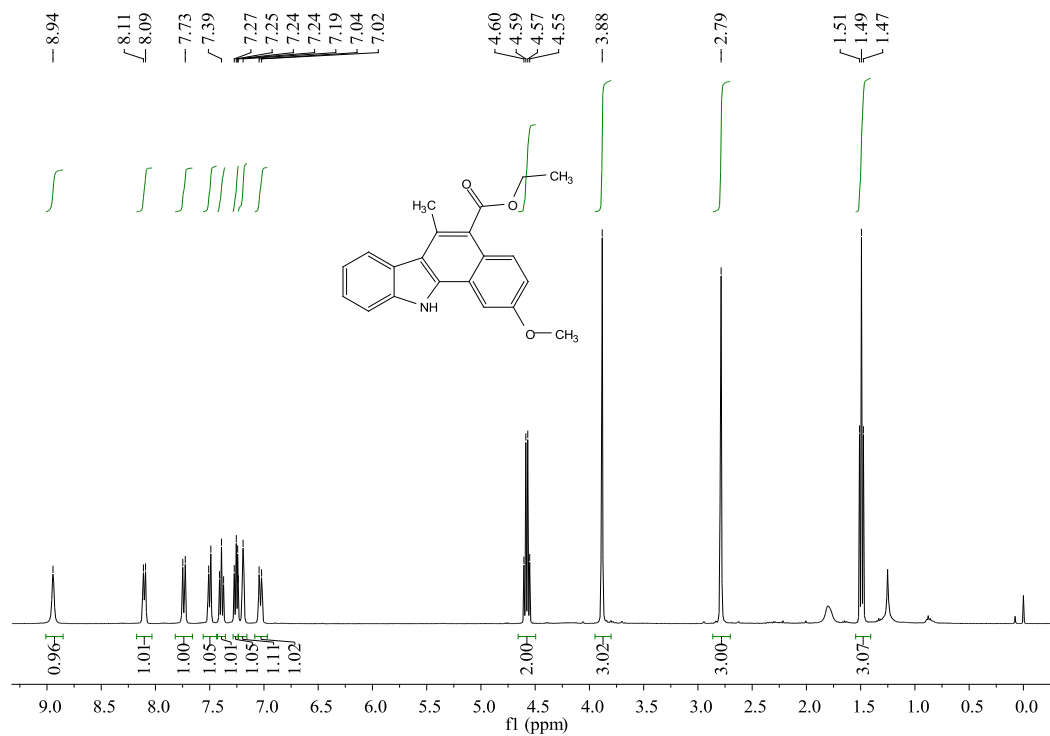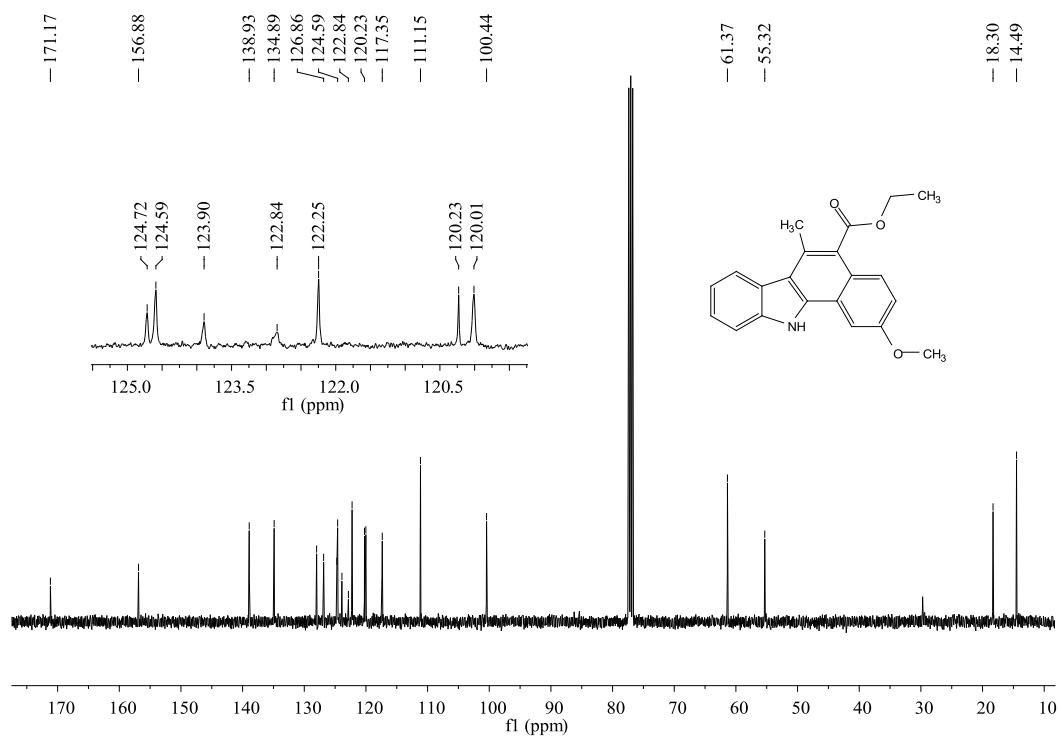

21) Ethyl 2-fluoro-6-methyl-11H-benzo[a]carbazole-5-carboxylate (**3u**) (Using CDCl<sub>3</sub> as solvent)

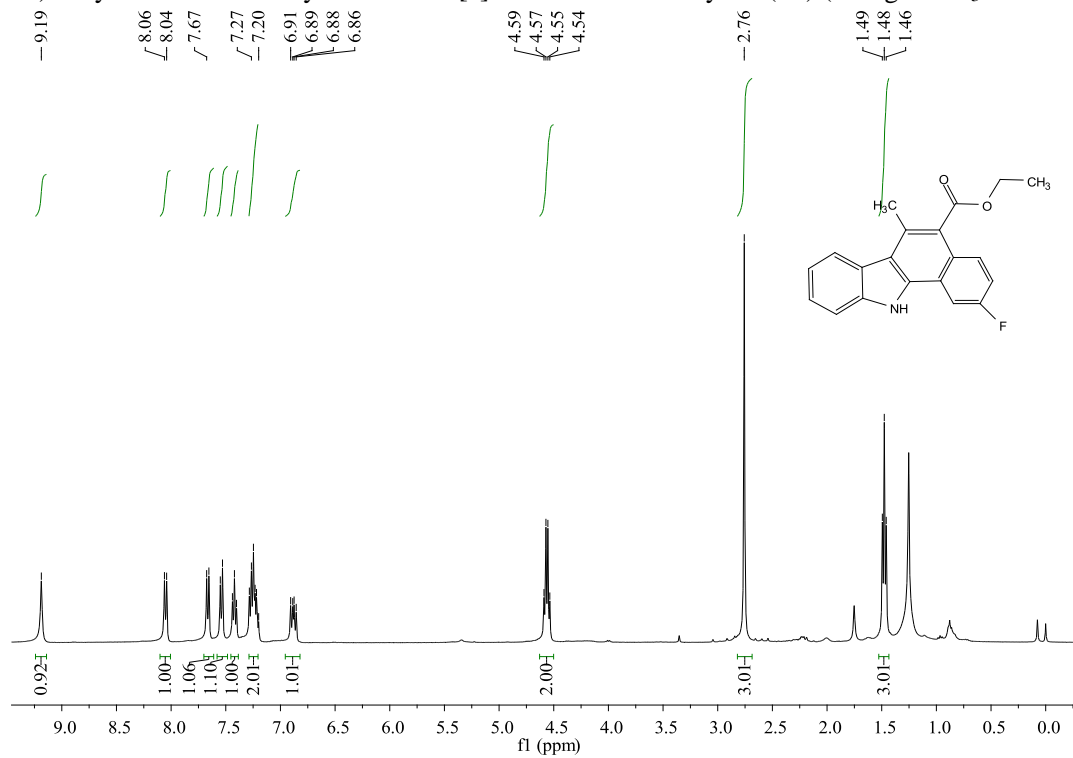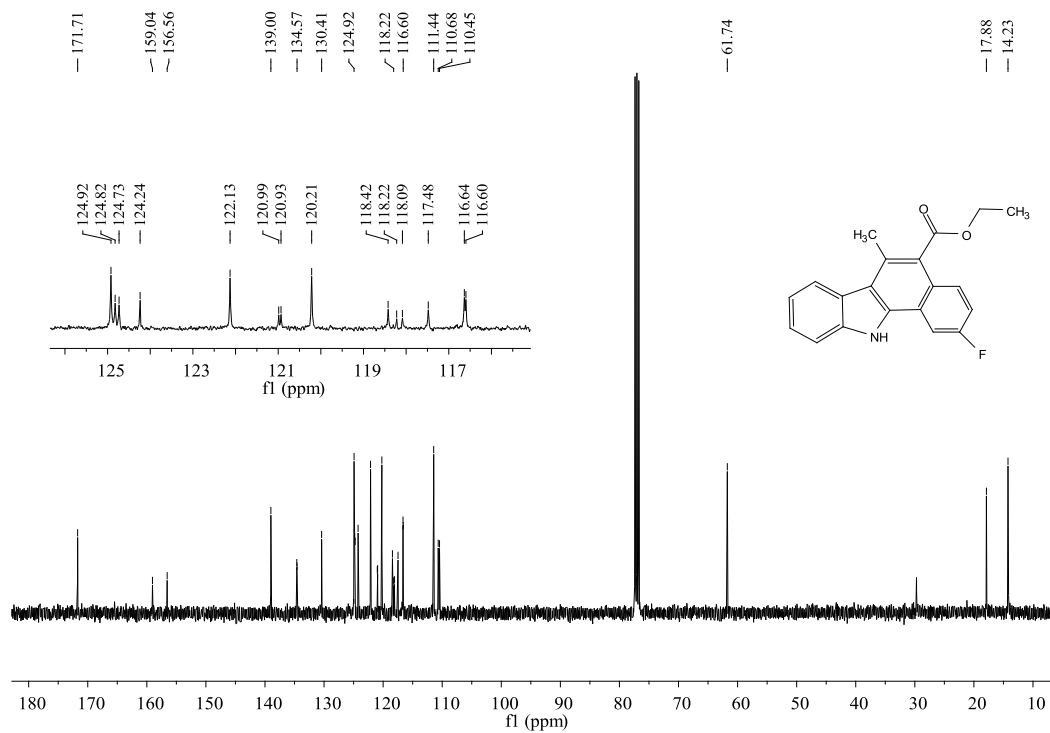



22) Ethyl 2-chloro-6-methyl-11H-benzo[a]carbazole-5-carboxylate (**3v**) (Using  $(\text{CD}_3)_2\text{SO}$  as solvent)

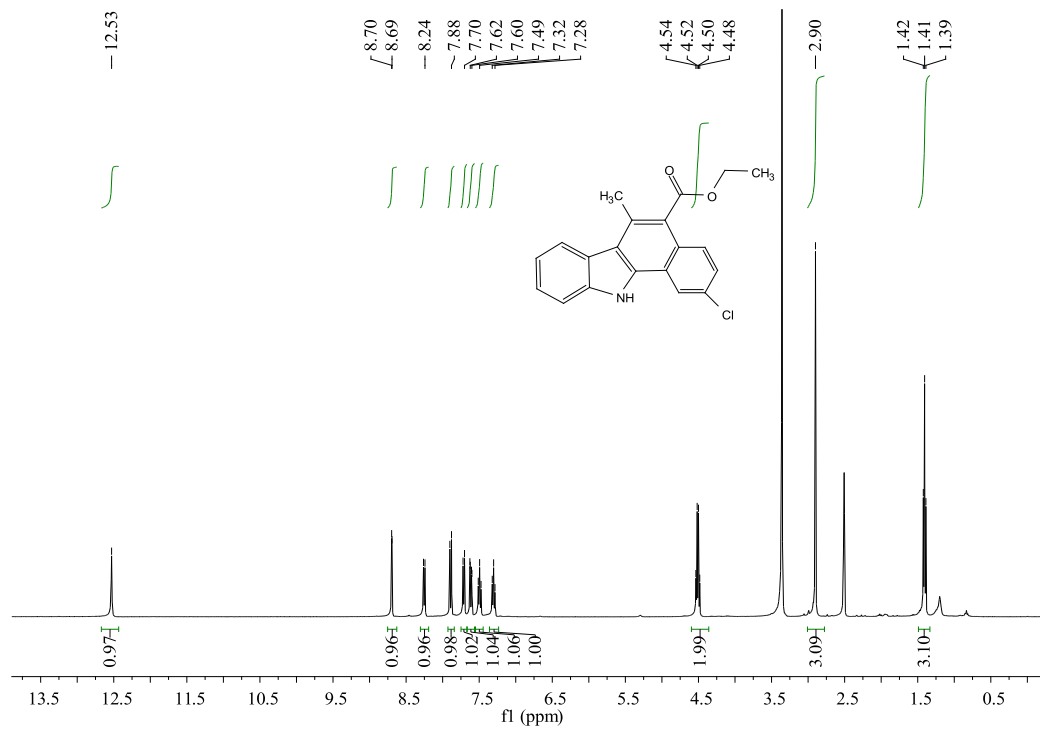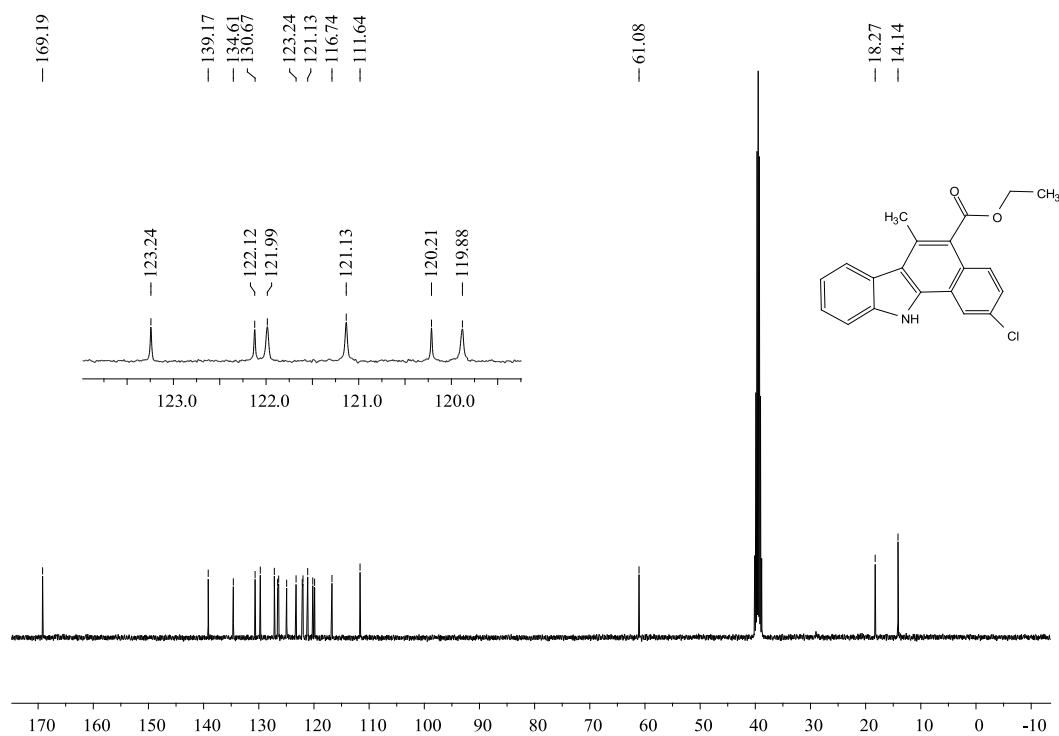

23) Ethyl 1,6-dimethyl-11H-benzo[a]carbazole-5-carboxylate (**3w**) (Using CDCl<sub>3</sub> as solvent)

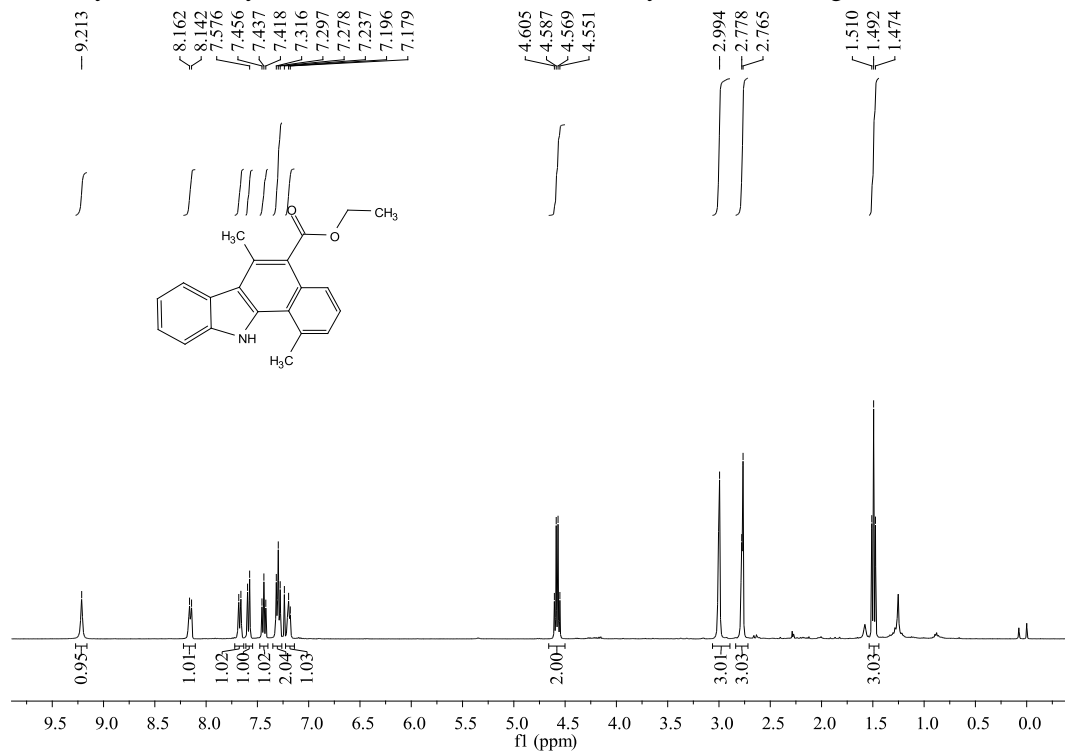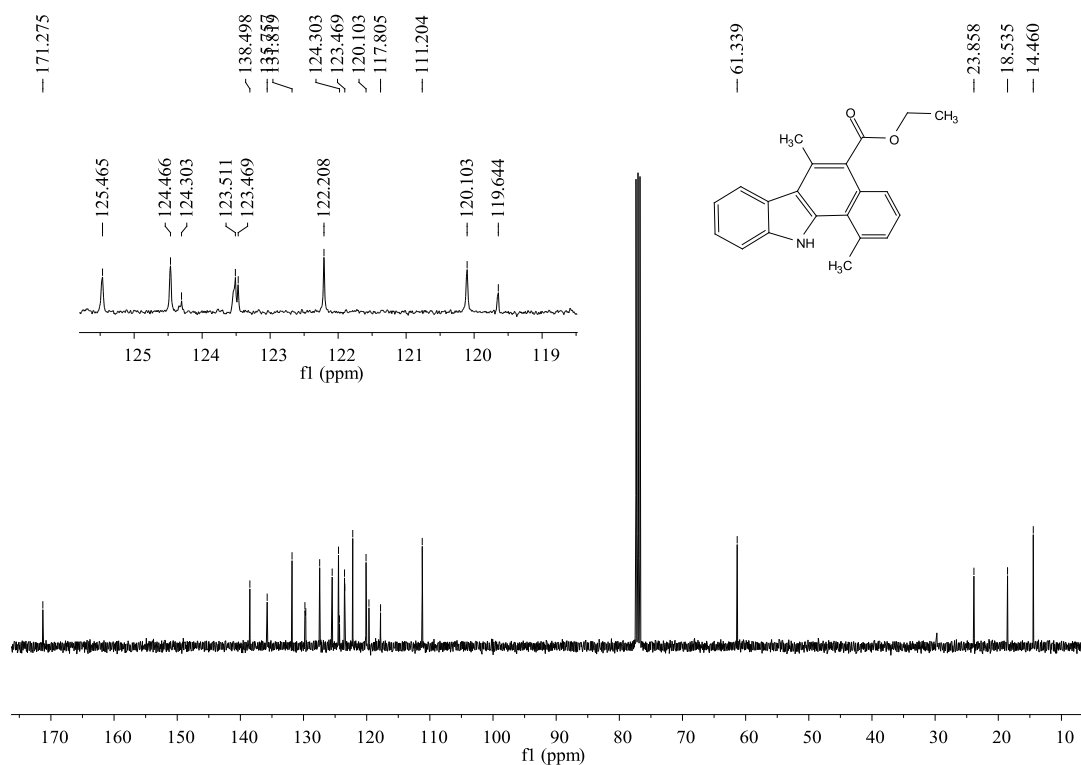

24) Ethyl 6-ethyl-11H-benzo[*a*]carbazole-5-carboxylate (**3x**) (Using CDCl<sub>3</sub> as solvent)

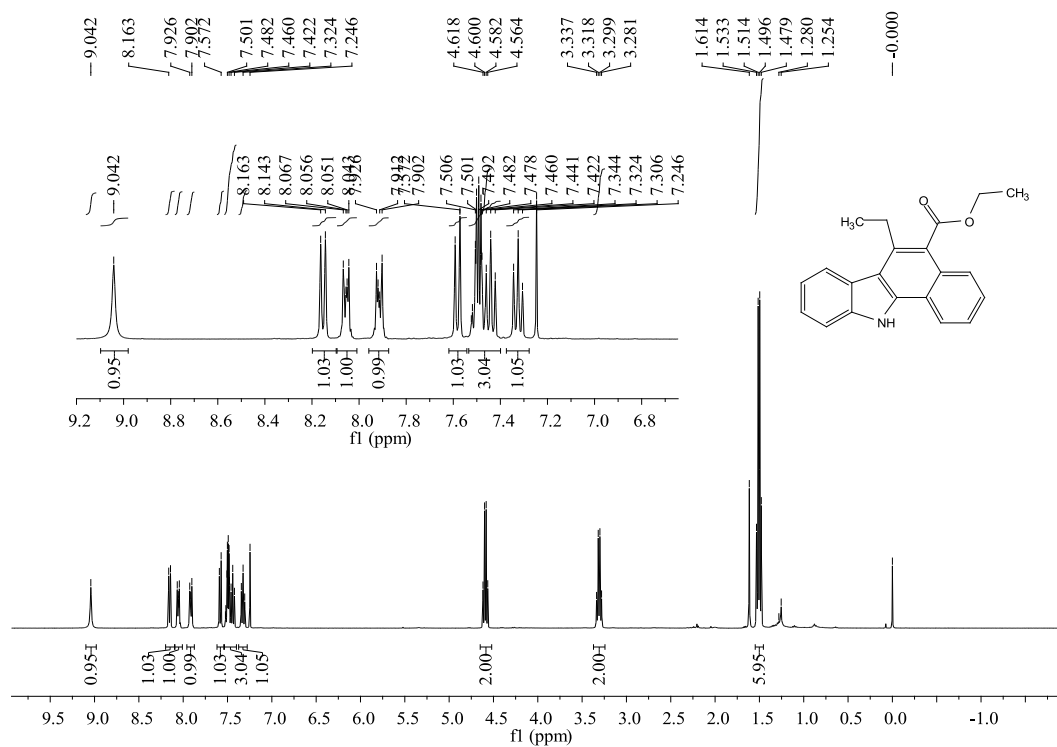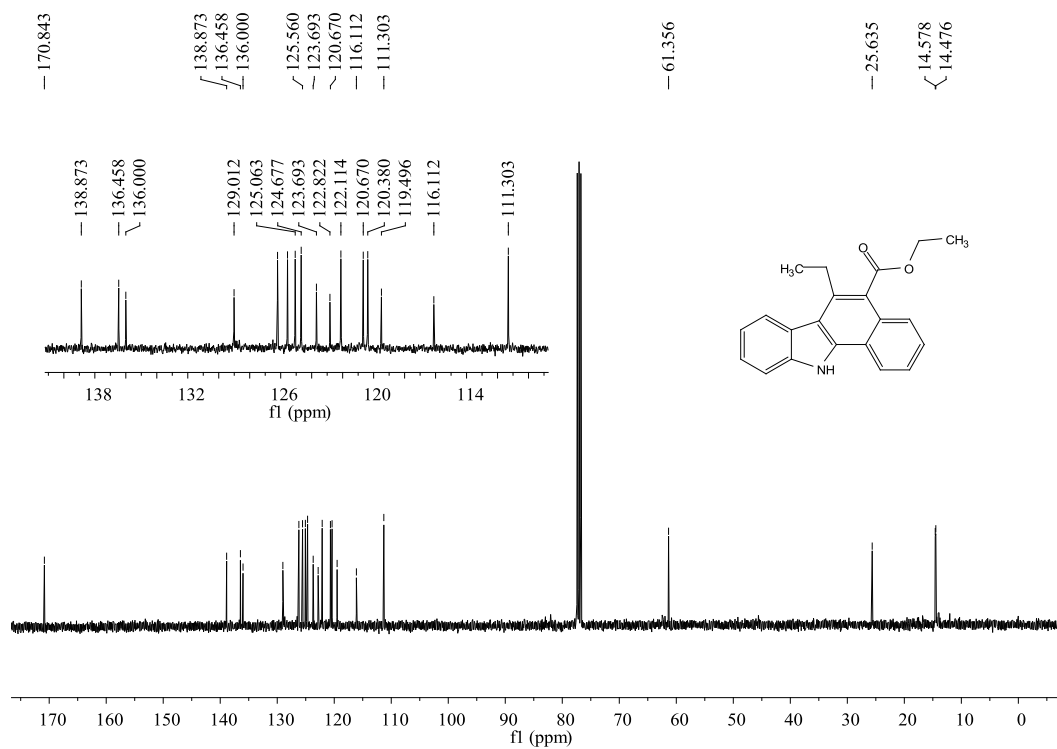

25) Methyl 6-(methoxymethyl)-11H-benzo[a]carbazole-5-carboxylate (**3y**) (Using CDCl<sub>3</sub> as solvent)

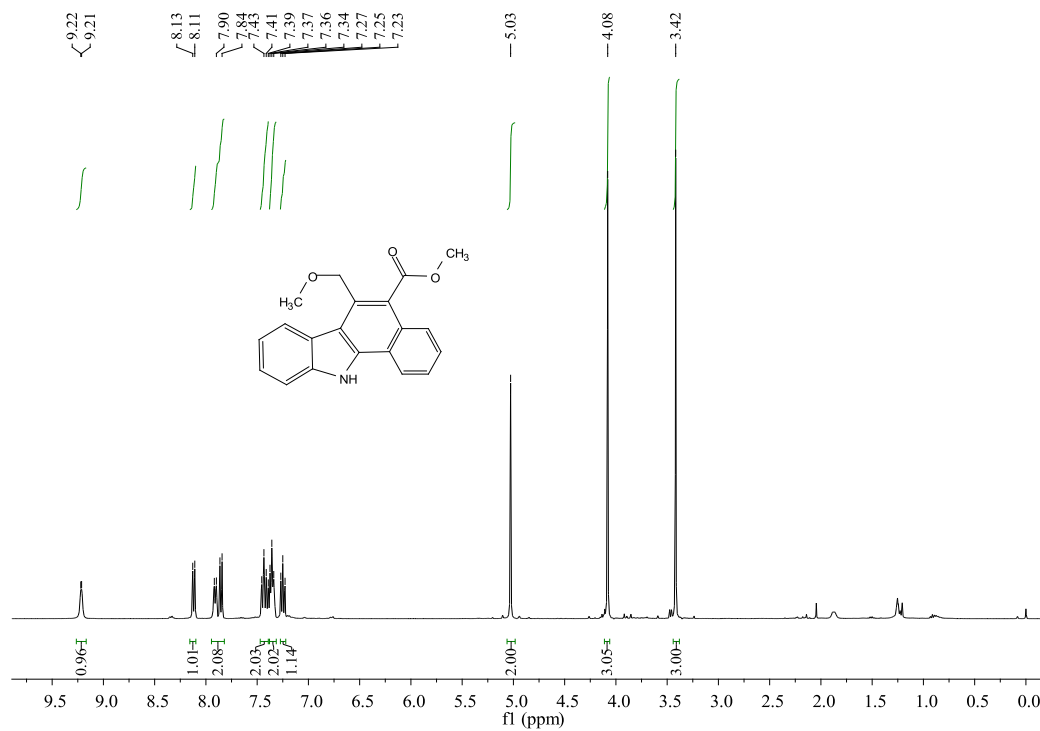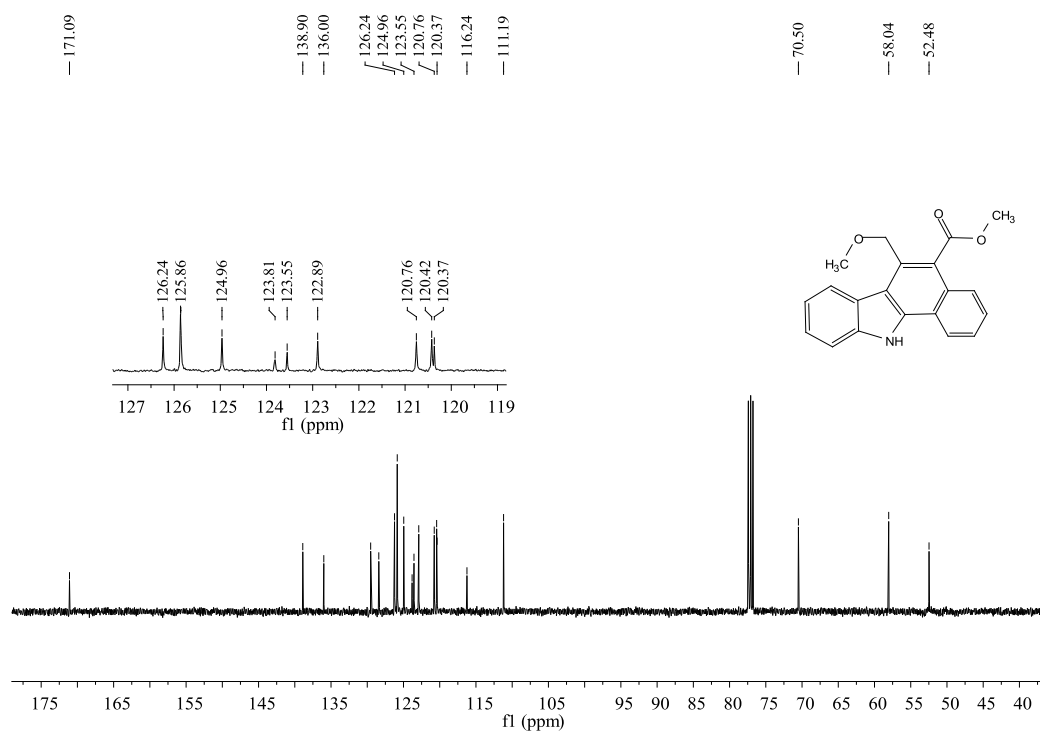

26) Methyl 6-phenethyl-11H-benzo[a]carbazole-5-carboxylate (**3z**) (Using CDCl<sub>3</sub> as solvent)

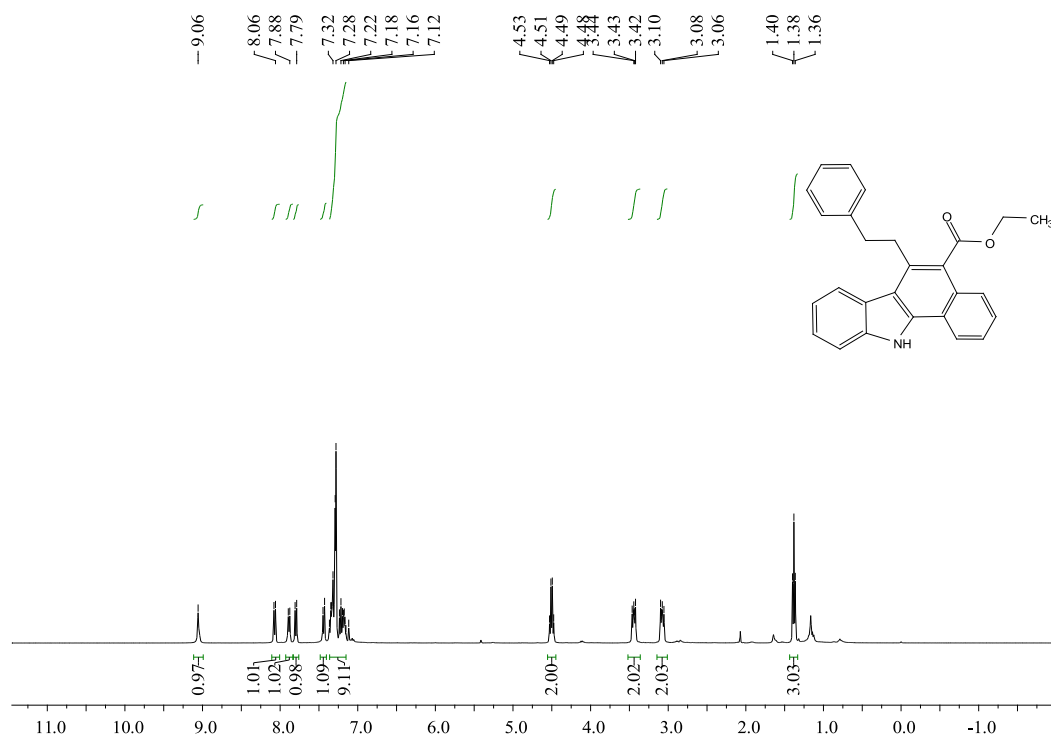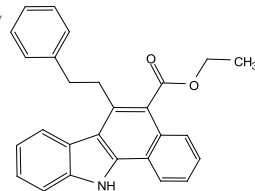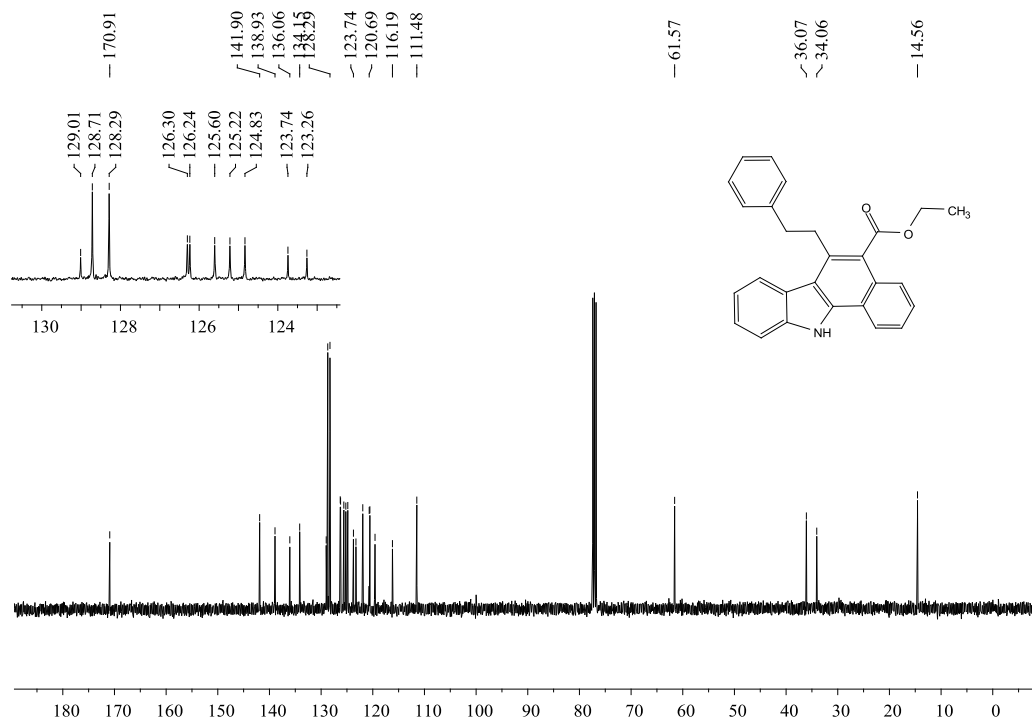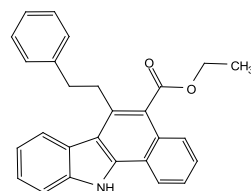

27) Methyl 6-(but-3-en-1-yl)-11H-benzo[a]carbazole-5-carboxylate (**3az**) (Using CDCl<sub>3</sub> as solvent)

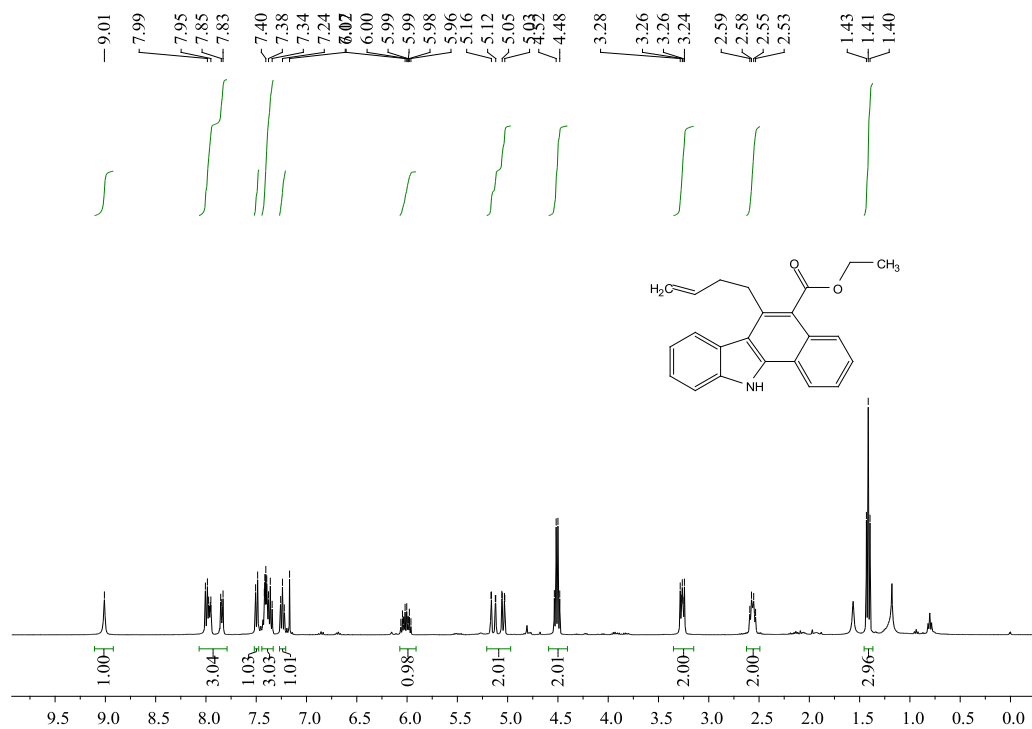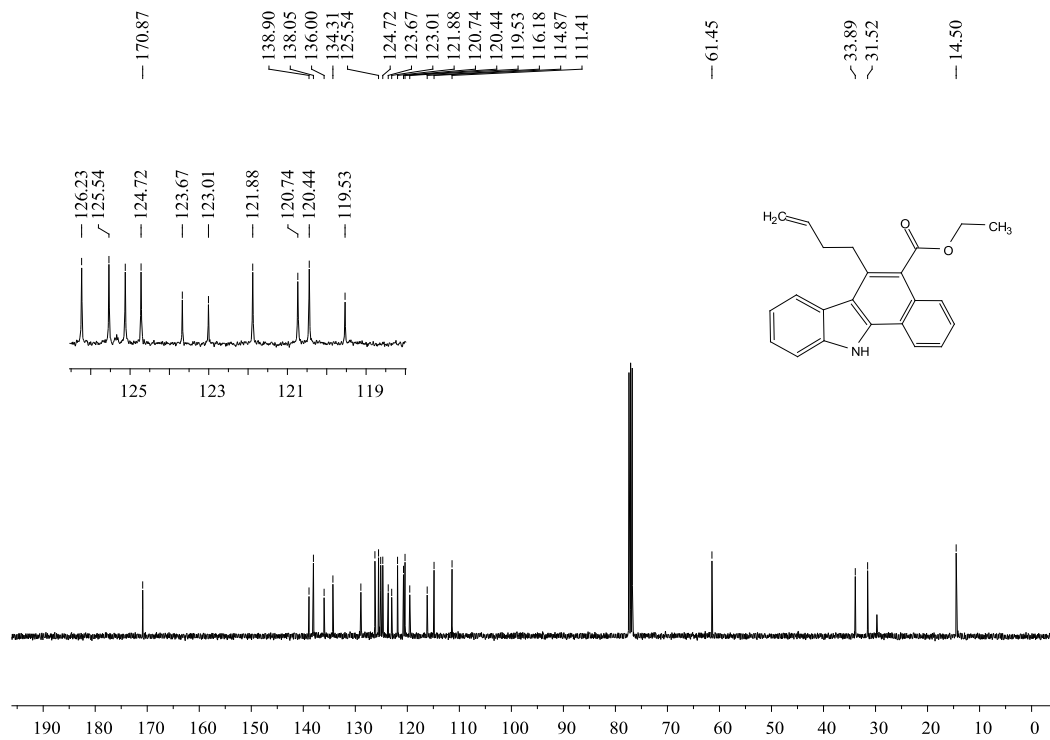

28) 1-(6-Methylindolo[2,1-a]isoquinolin-5-yl)ethanone (**3bz**) (Using CDCl<sub>3</sub> as solvent)

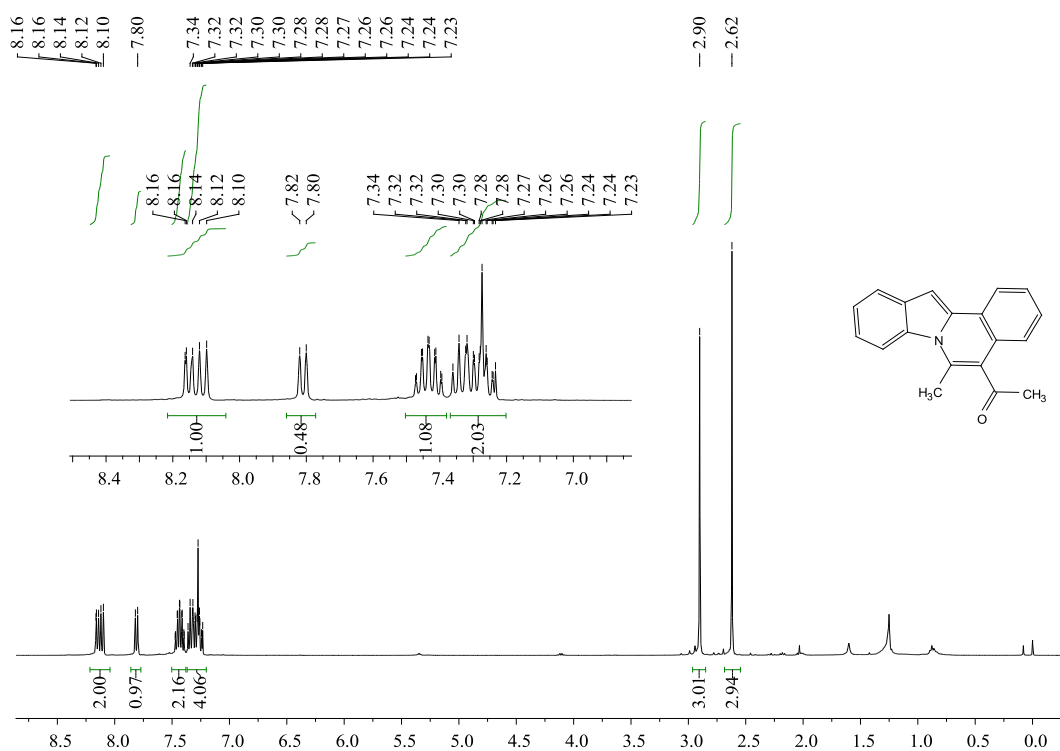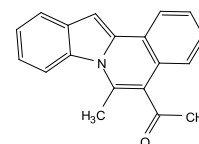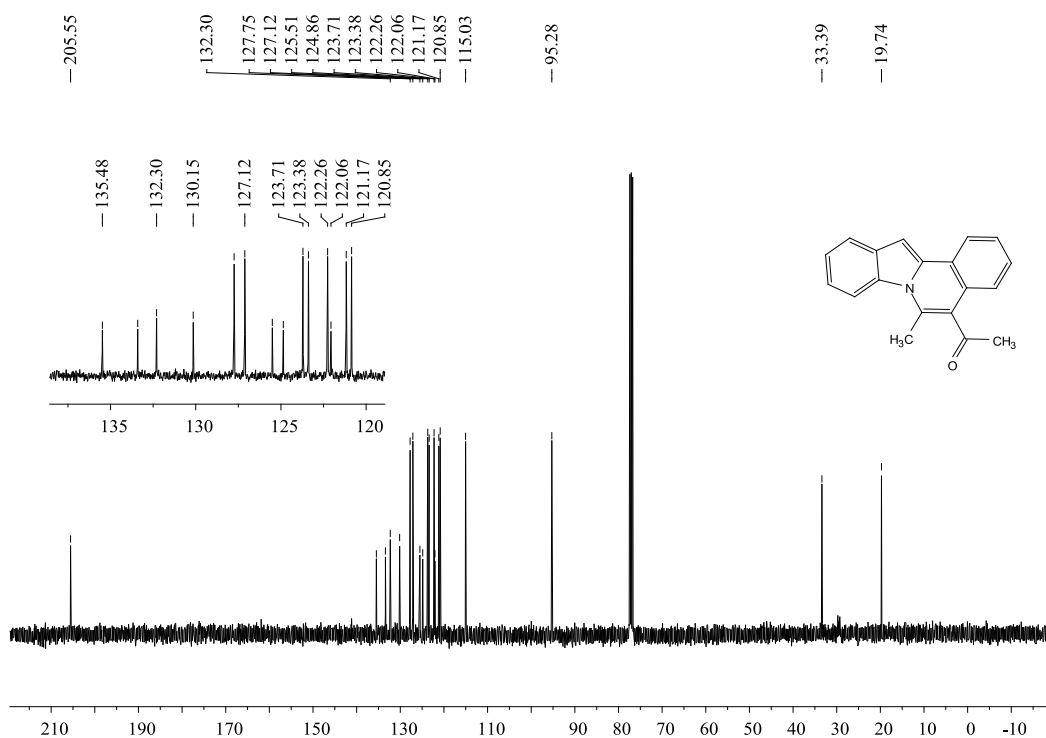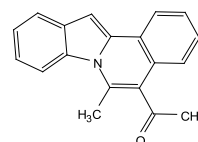

29) 1-(6-Phenylindolo[2,1-a]isoquinolin-5-yl)ethanone (**3cz**) (Using CDCl<sub>3</sub> as solvent)

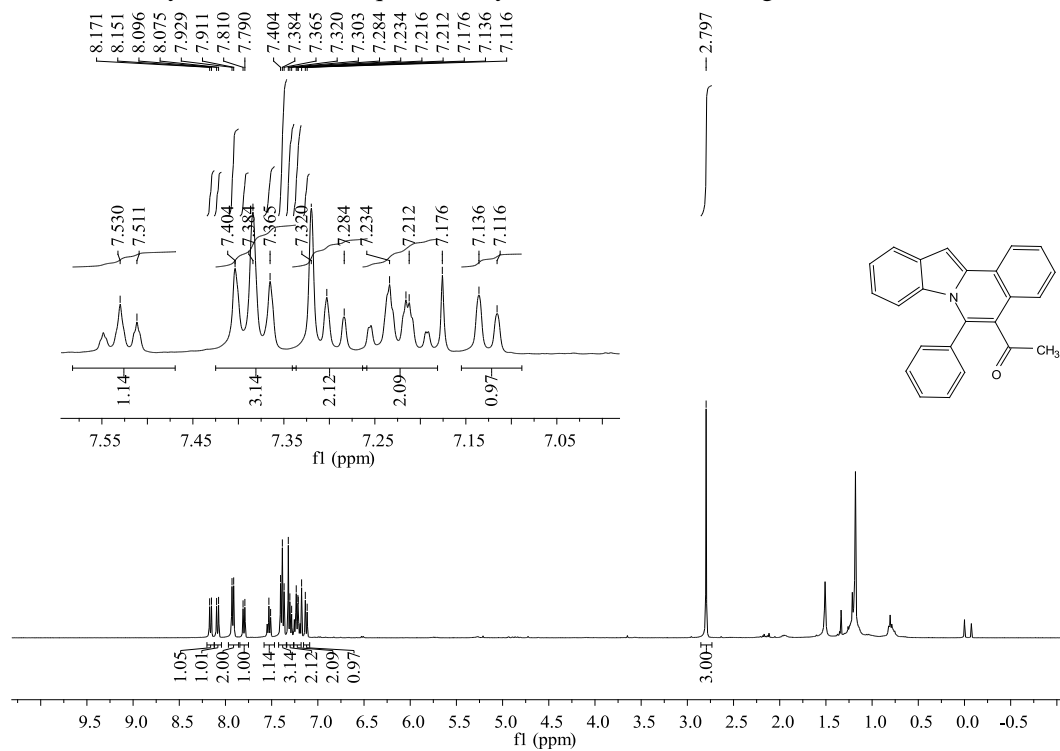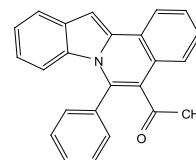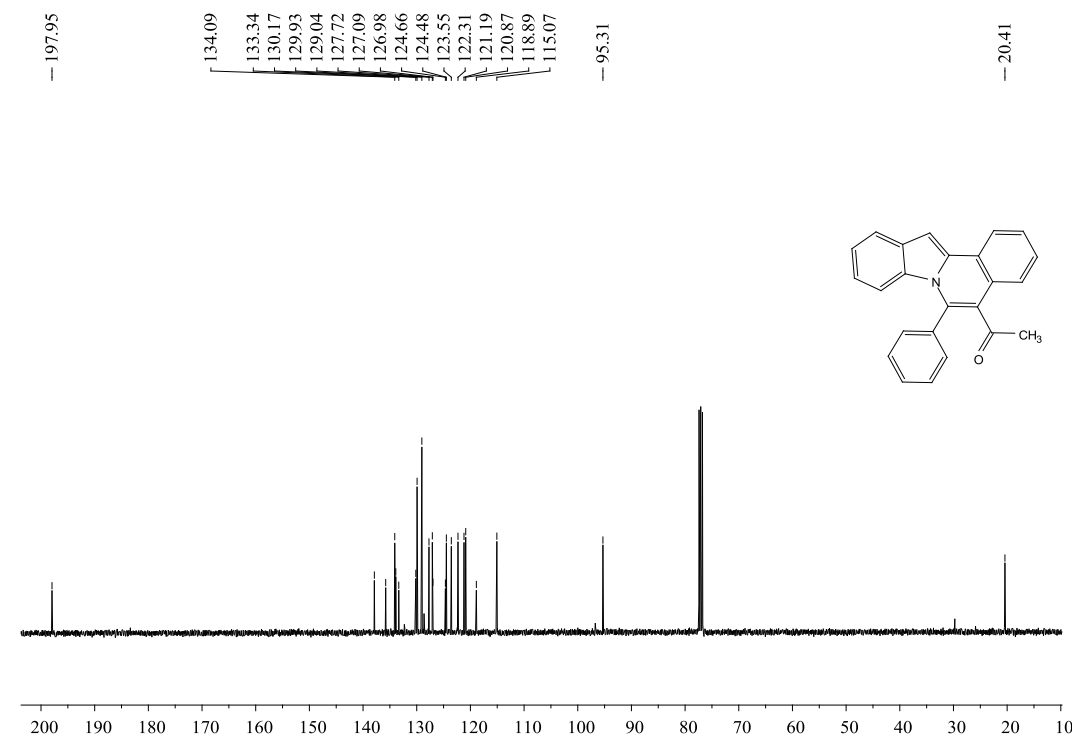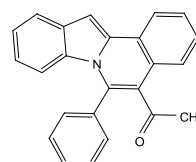



30) 2,3-Dihydro-1H-dibenzo[a,c]carbazol-4(9H)-one (**3dz**) (Using DMSO-d<sub>6</sub> as solvent)

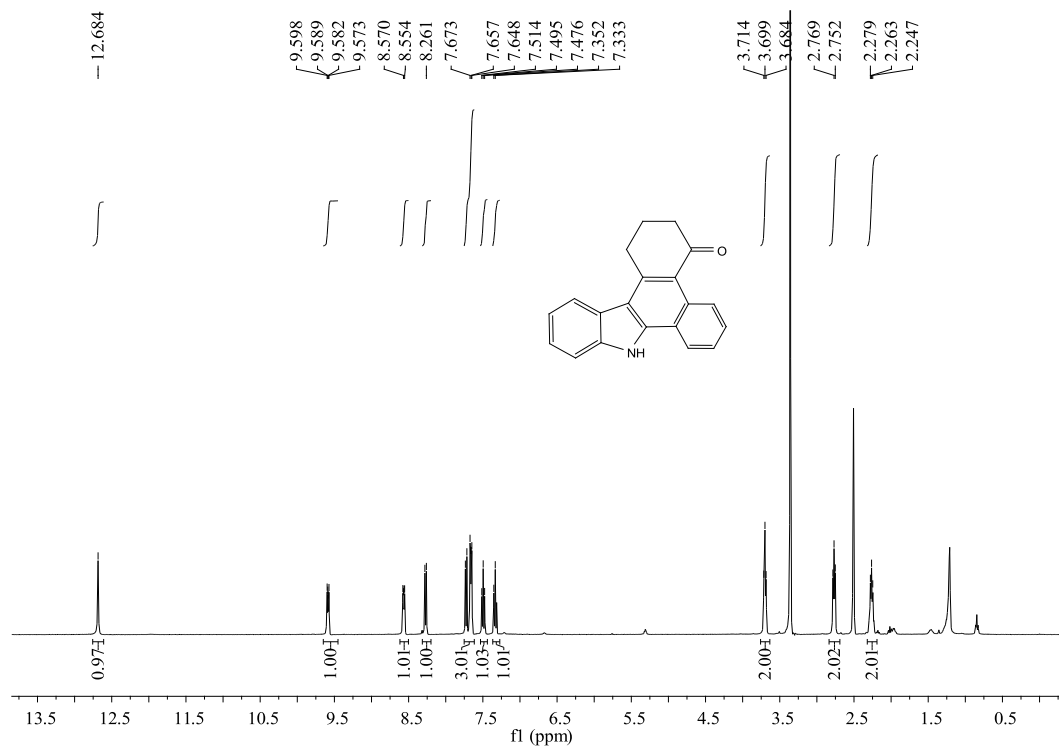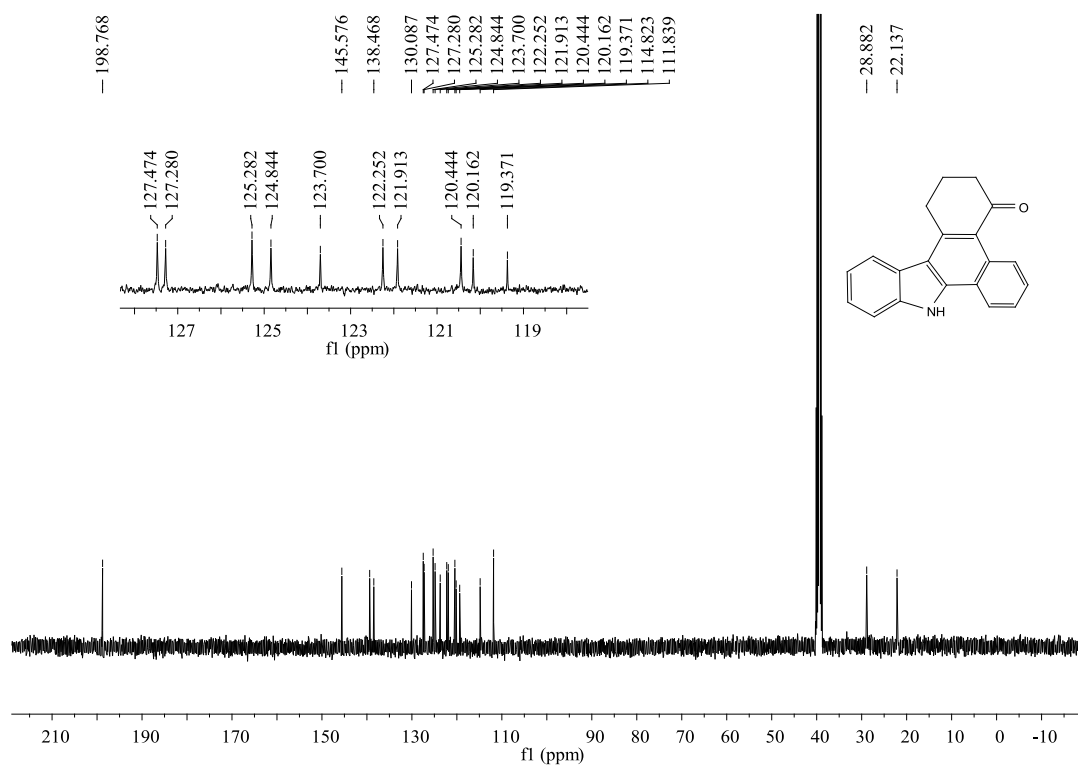

31) Ethyl 3,8-dimethoxy-6-methyl-11H-benzo[a]carbazole-5-carboxylate (**3fz**) (Using CDCl<sub>3</sub> as solvent)

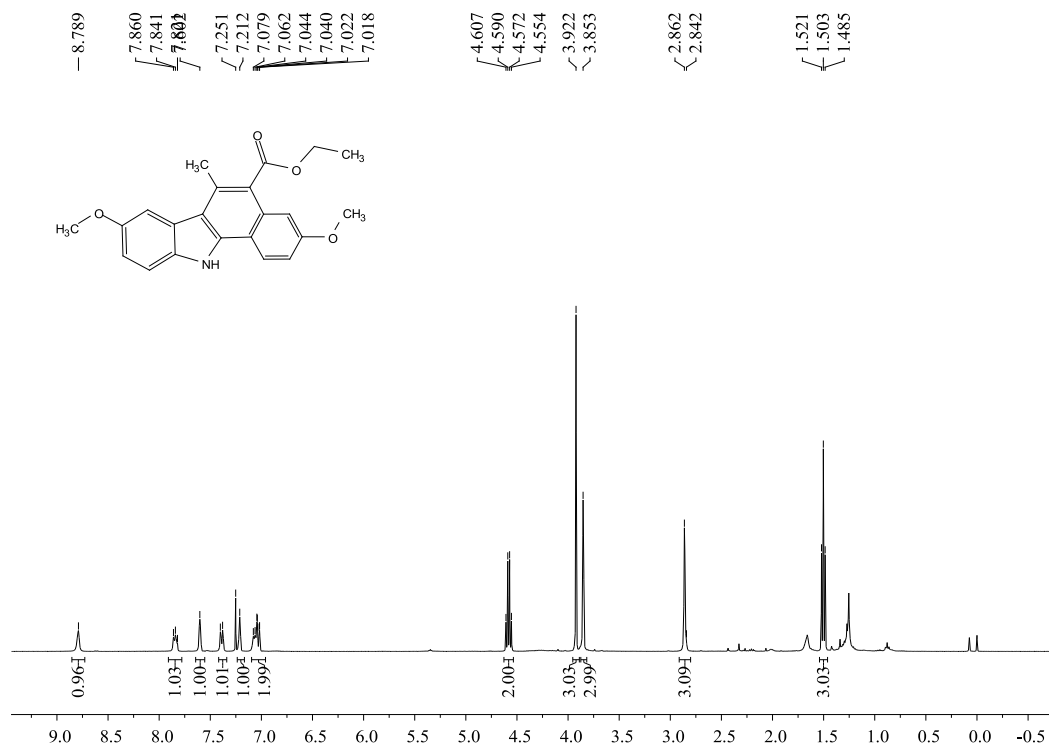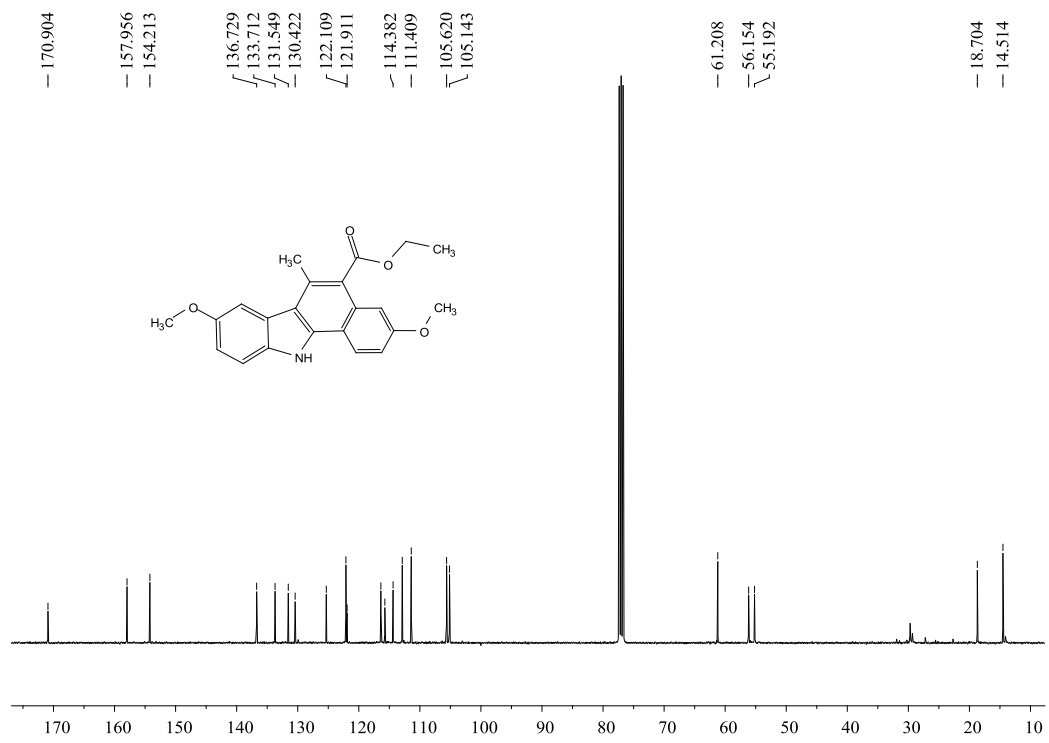

32) Ethyl 3-chloro-8-methoxy-6-methyl-11H-benzo[a]carbazole-5-carboxylate (**3gz**) (Using CD<sub>3</sub>COCD<sub>3</sub> as solvent)

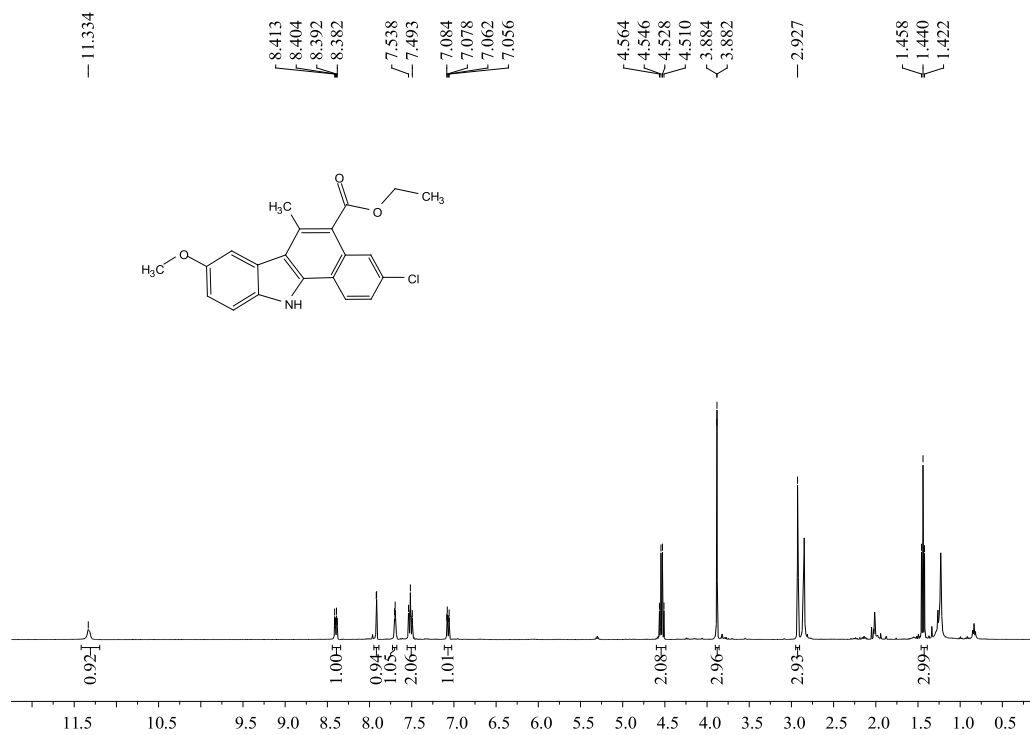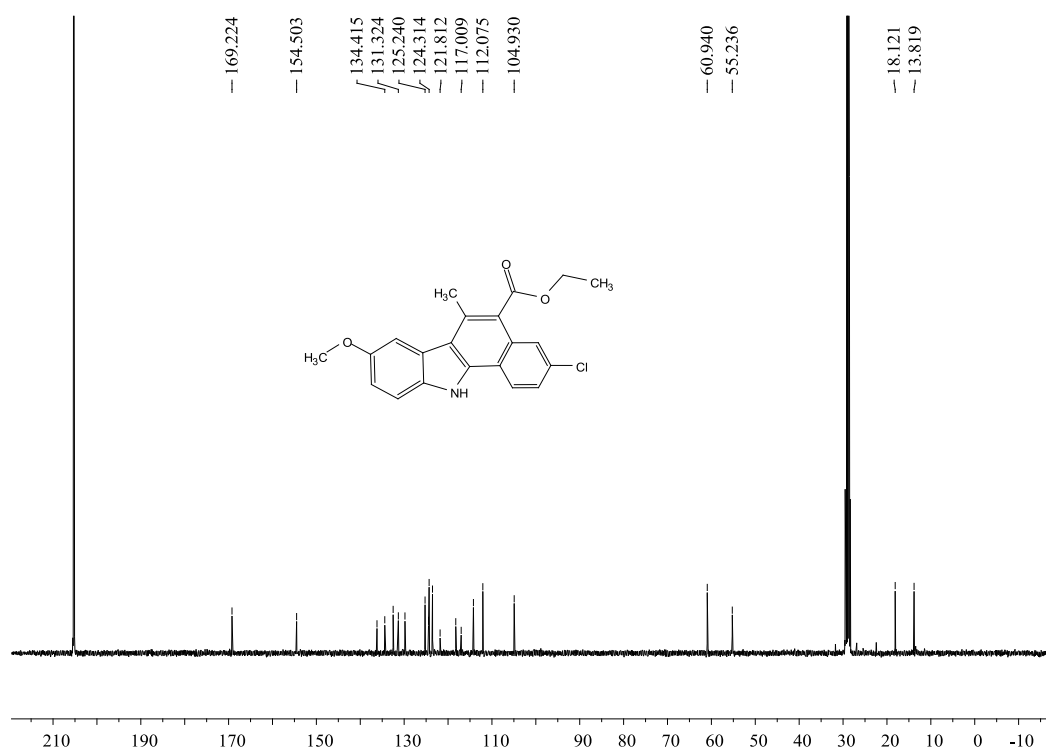

33) Diethyl 5,11-dimethylisoquinolino[2,1,8-lma]carbazole-4,12-dicarboxylate (**4a**) (Using CDCl<sub>3</sub> as solvent)

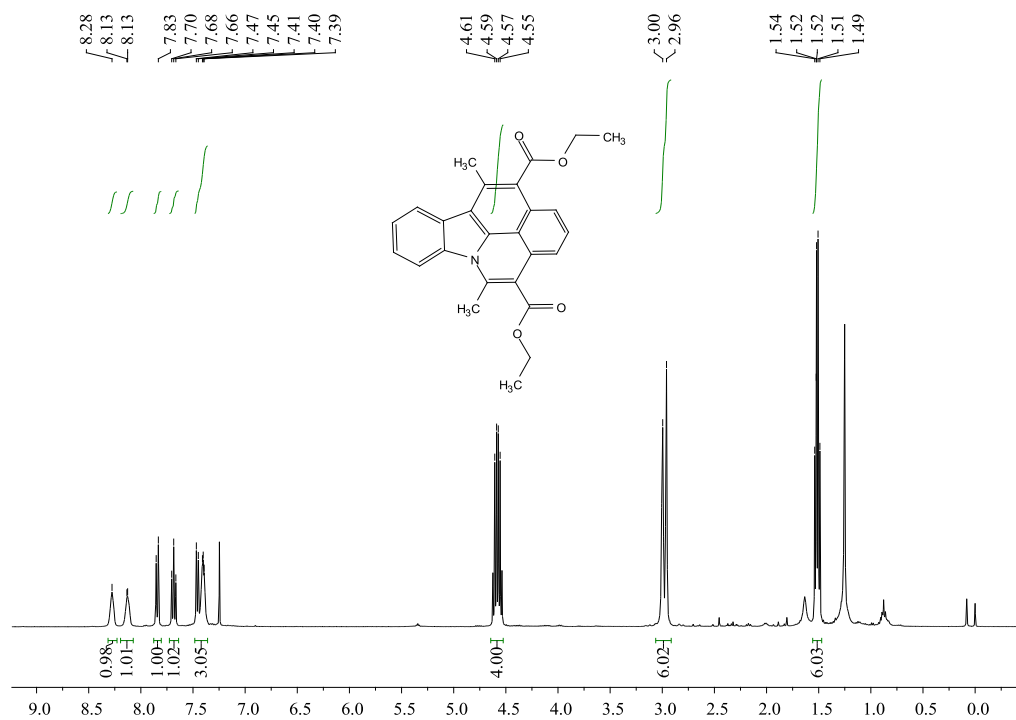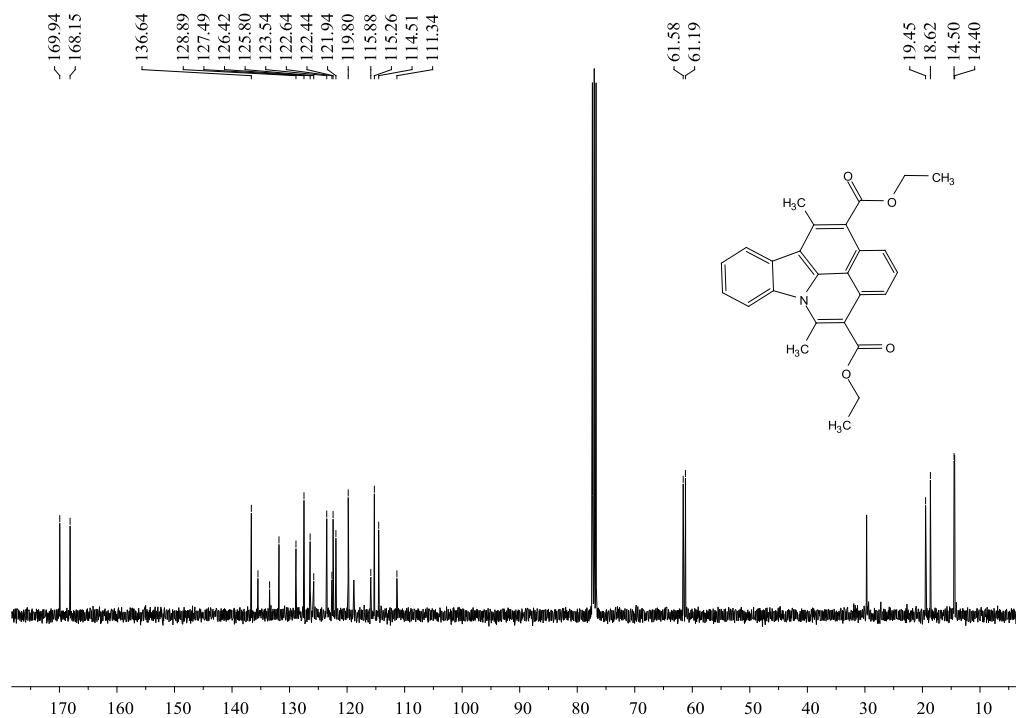

34) Diethyl 5,9,11-trimethylisoquinolino[2,1,8-lma]carbazole-4,12-dicarboxylate (**4b**) (Using CDCl<sub>3</sub> as solvent)

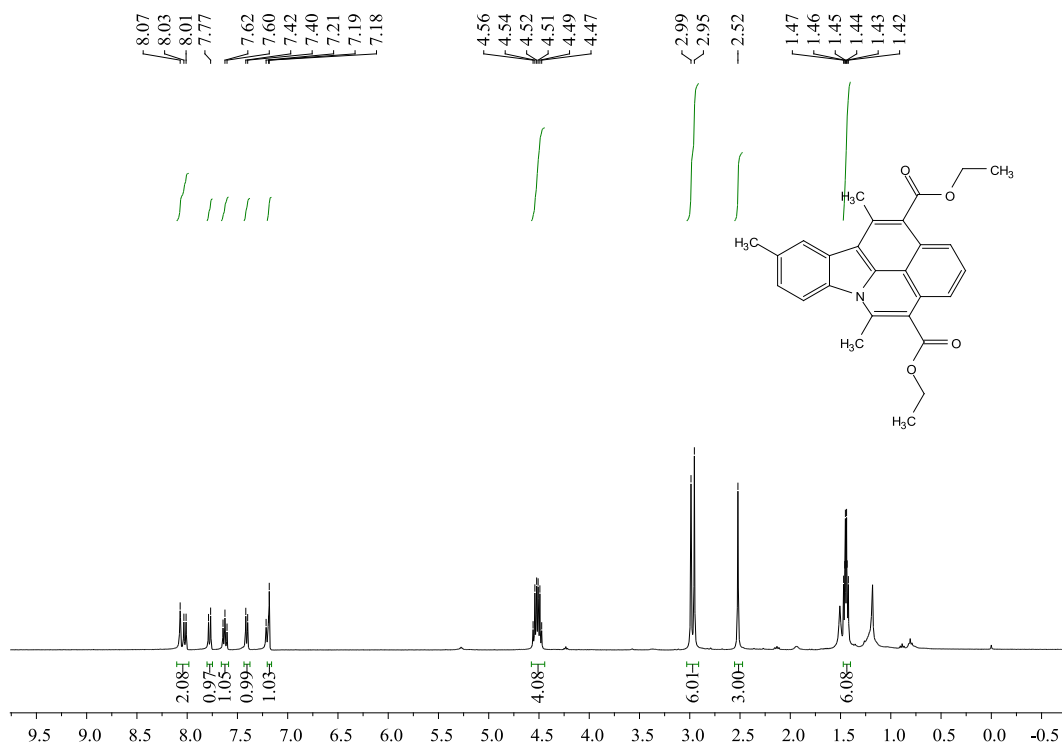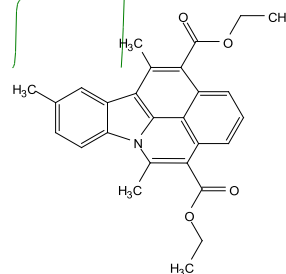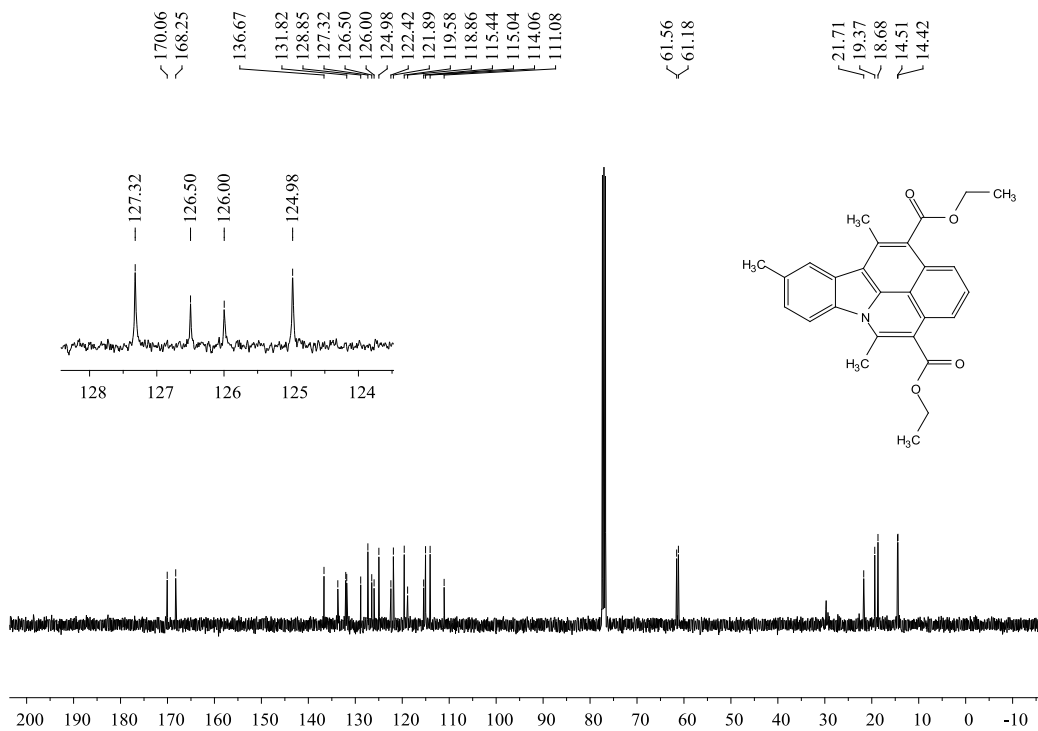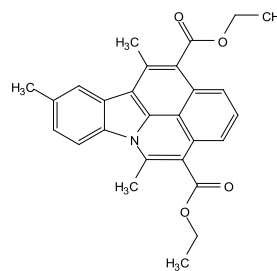

35) Diethyl 9-methoxy-5,11-dimethylisoquinolino[2,1,8-*lma*]carbazole-4,12-dicarboxylate (**4c**)  
 (Using CDCl<sub>3</sub> as solvent)

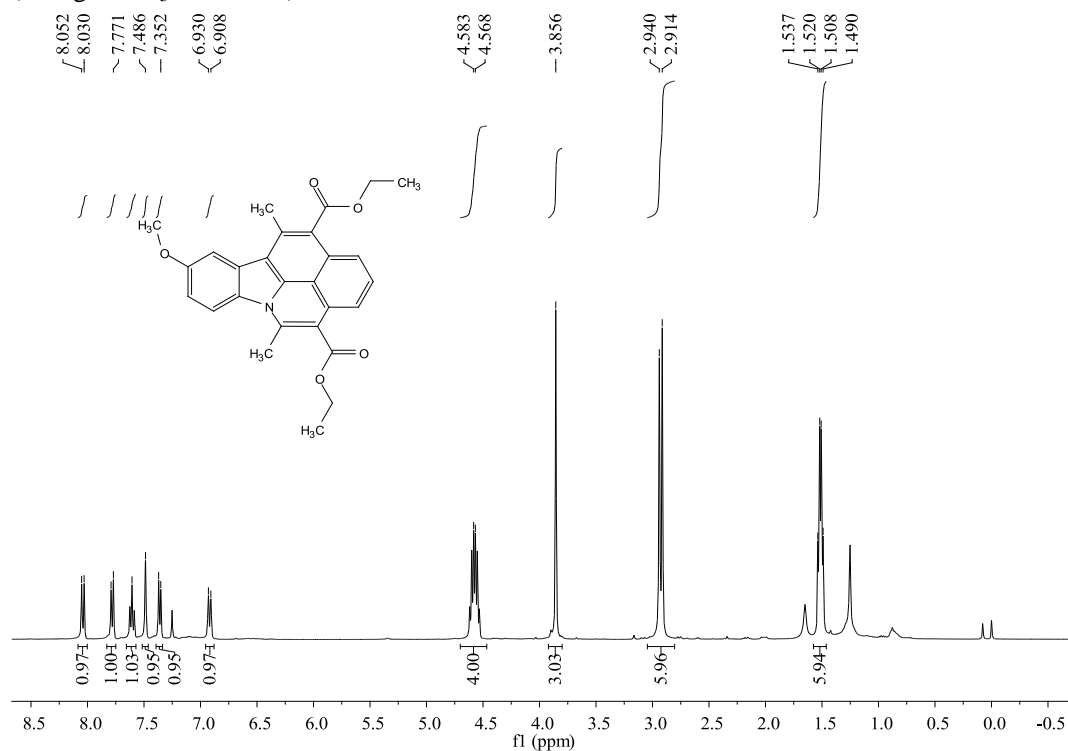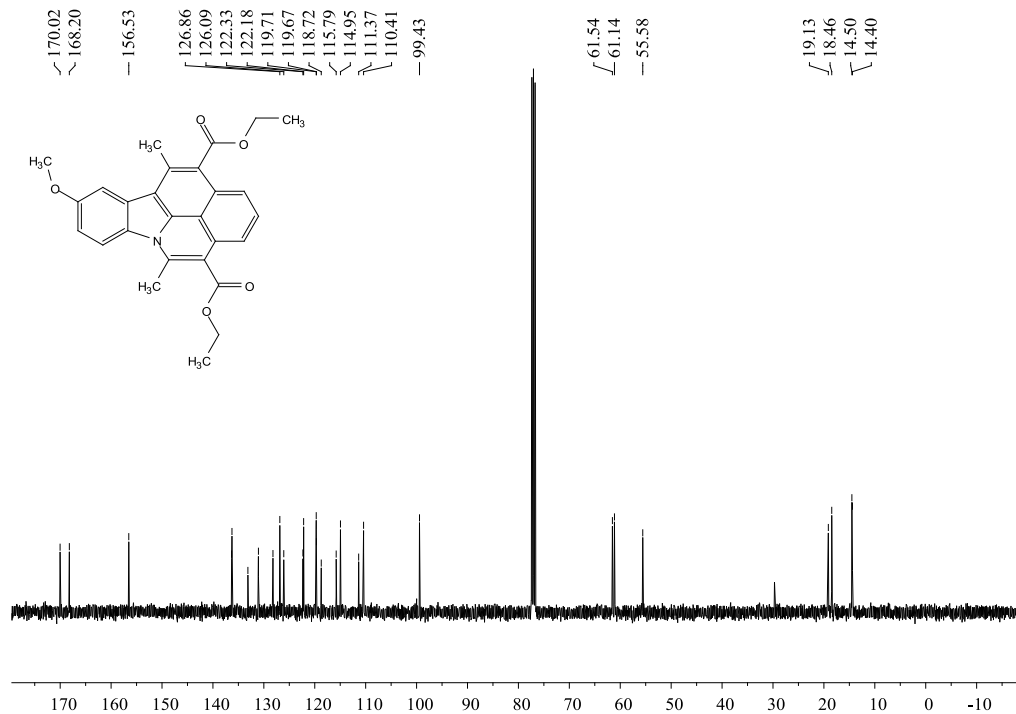

36) Diethyl 2,5,11-trimethylisoquinolino[2,1,8-lma]carbazole-4,12-dicarboxylate (**4d**) (Using CDCl<sub>3</sub> as solvent)

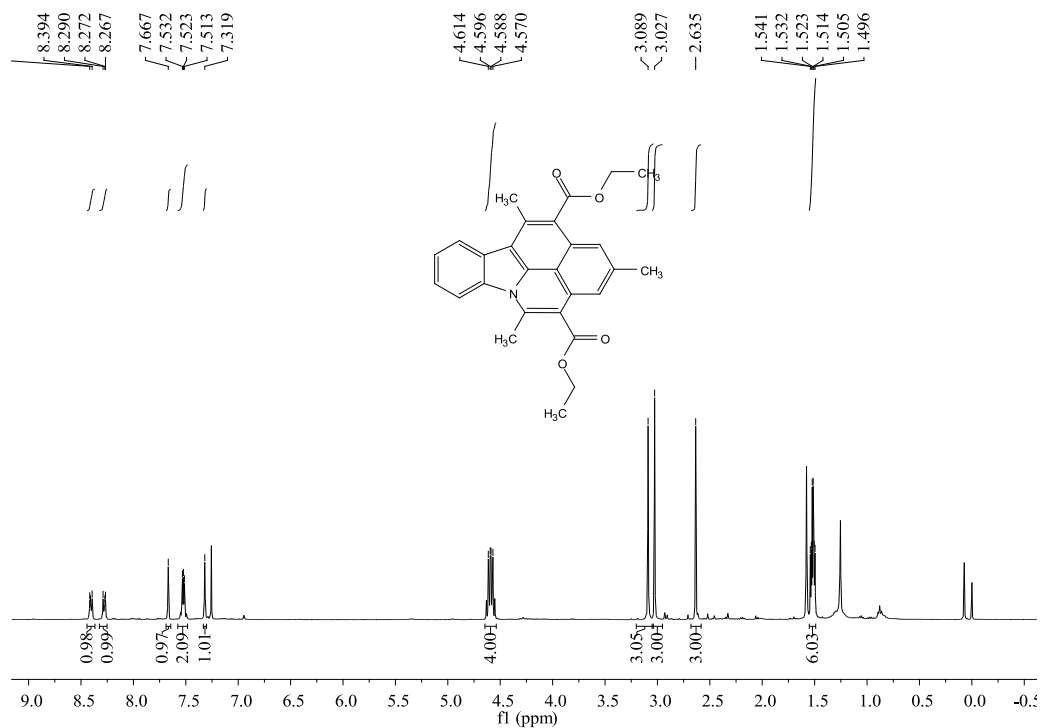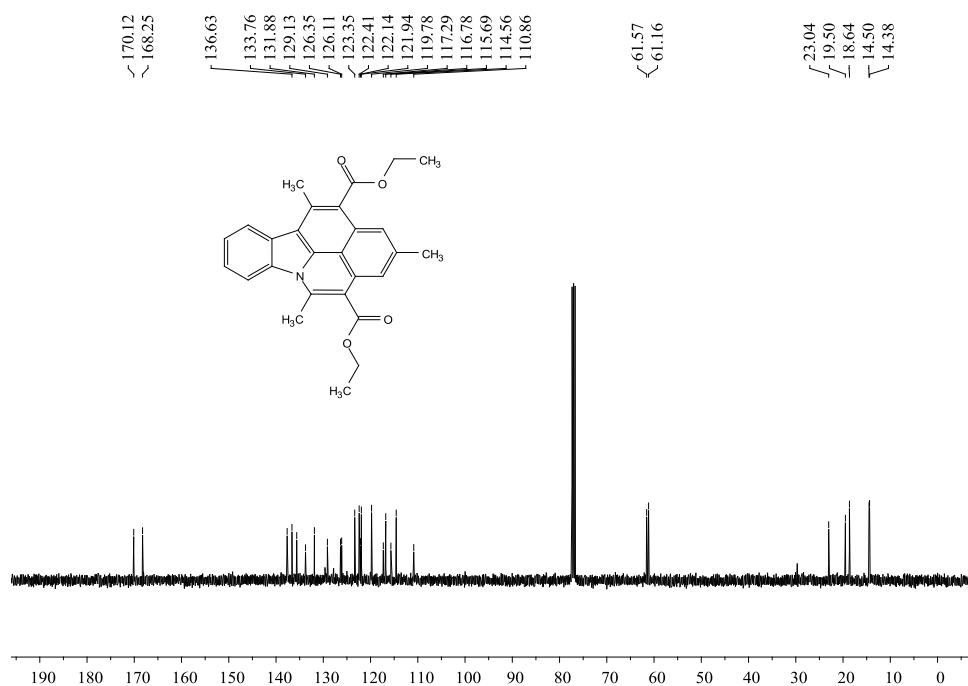

37) Diethyl 2-fluoro-5,11-dimethylisoquinolino[2,1,8-lma]carbazole-4,12-dicarboxylate (**4e**)  
 (Using CDCl<sub>3</sub> as solvent)

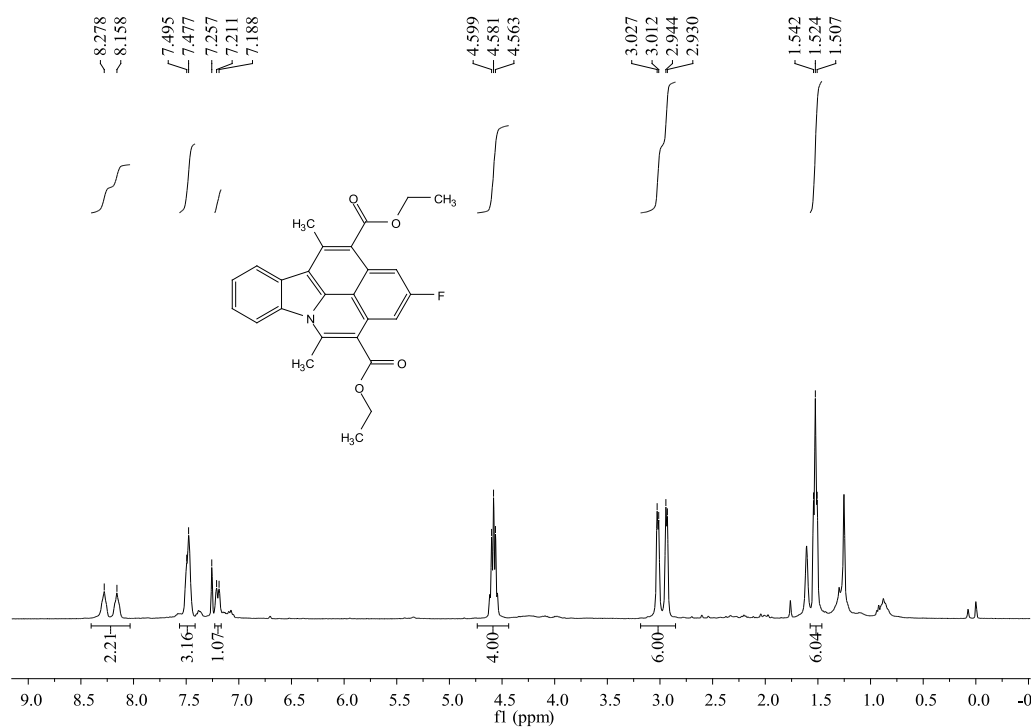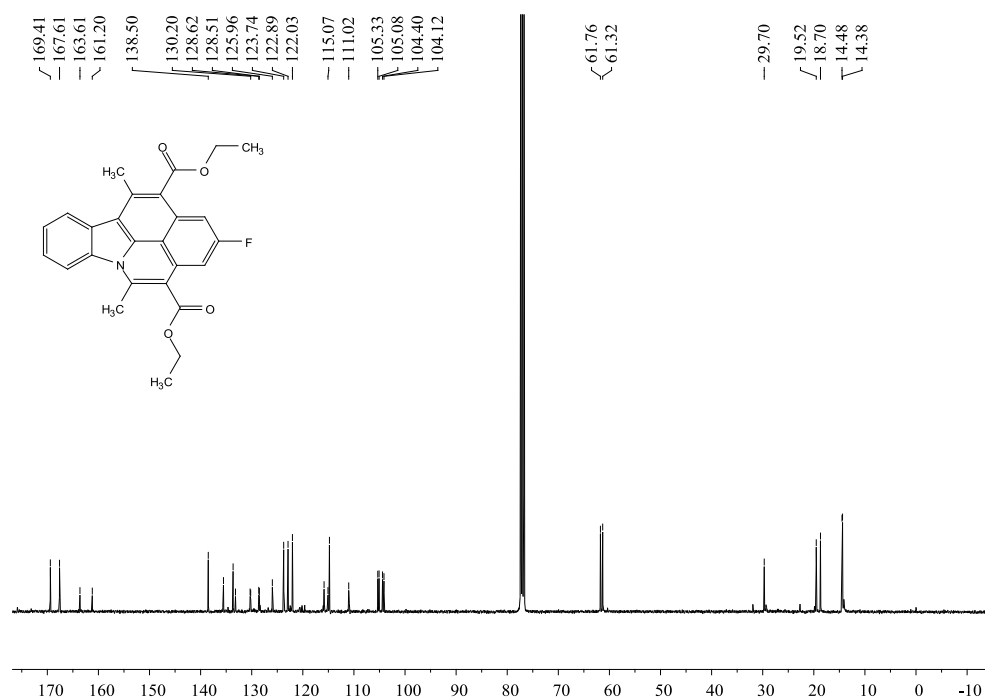



38) Diethyl 2,9-dimethoxy-5,11-dimethylisoquinolino[2,1,8-lma]carbazole-4,12-dicarboxylate (**4f**)  
 (Using CDCl<sub>3</sub> as solvent)

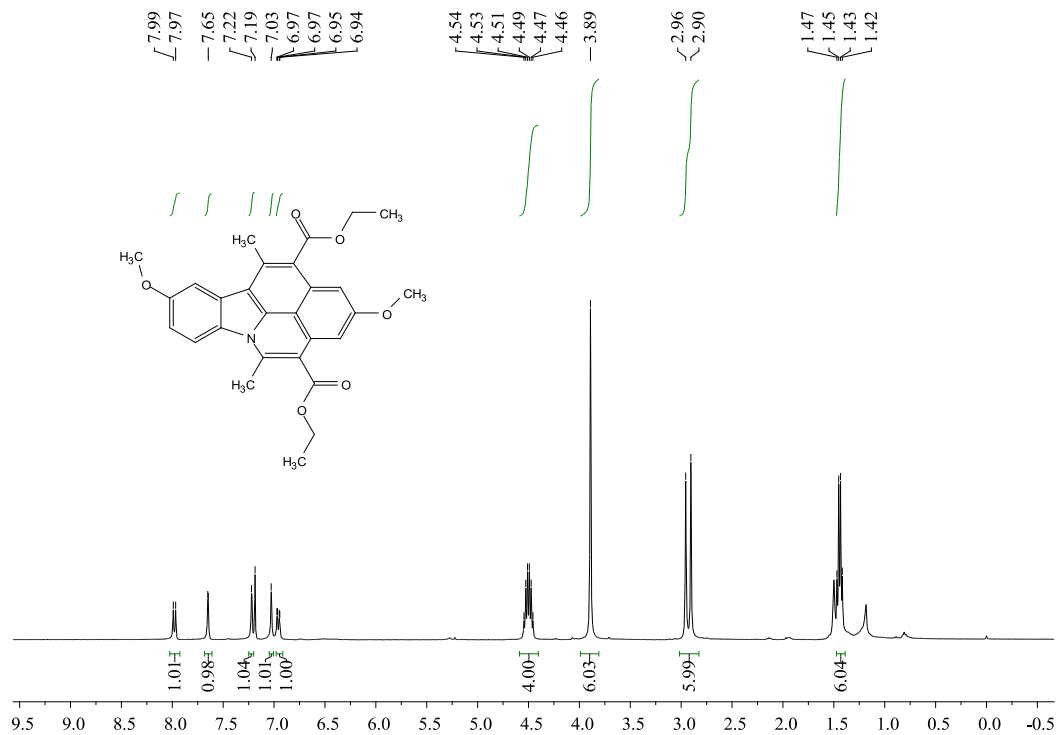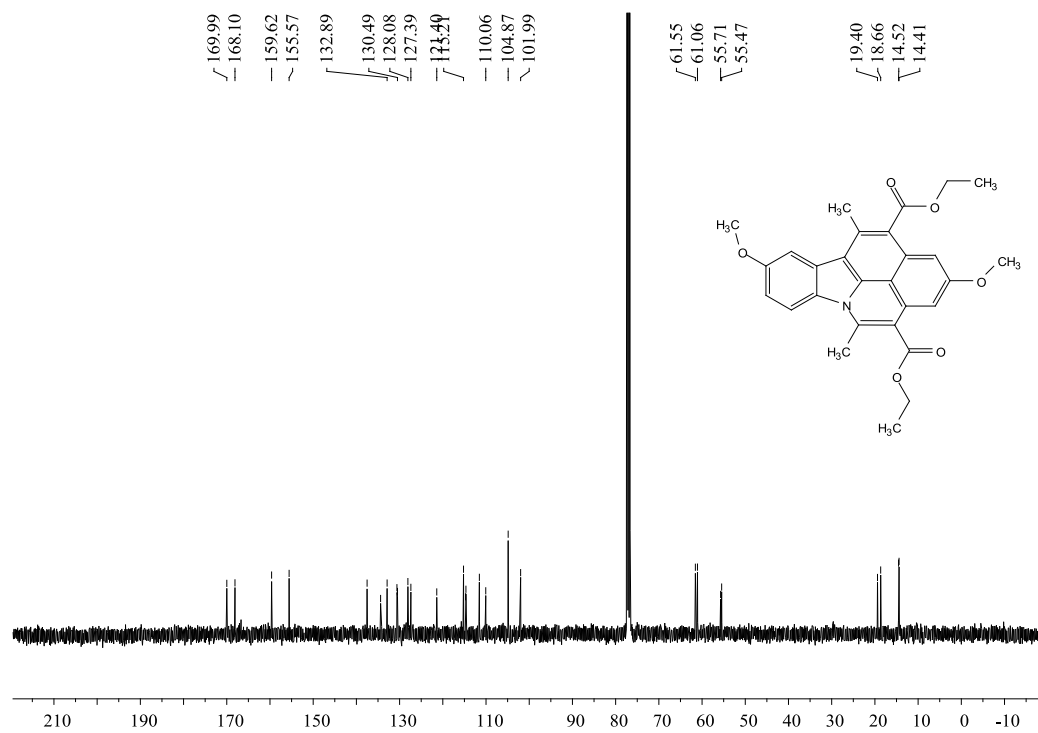

39) Diethyl 2-chloro-9-methoxy-5,11-dimethylisoquinolino[2,1,8-lma]carbazole-4,12-dicarboxylate (**4g**) (Using CDCl<sub>3</sub> as solvent)

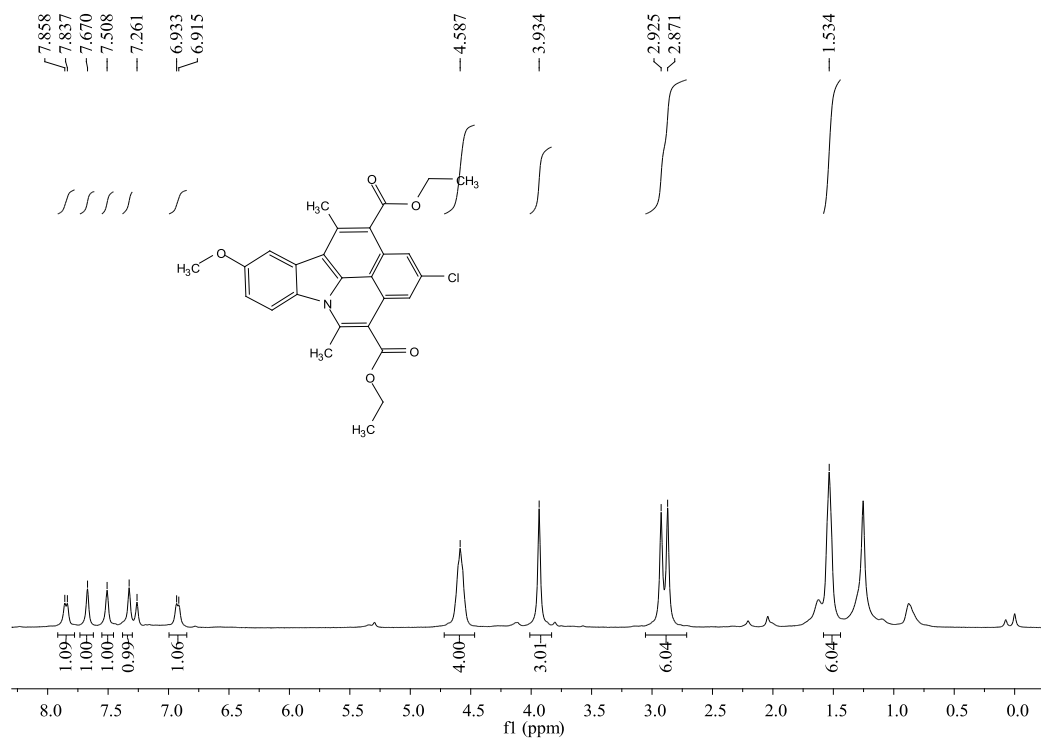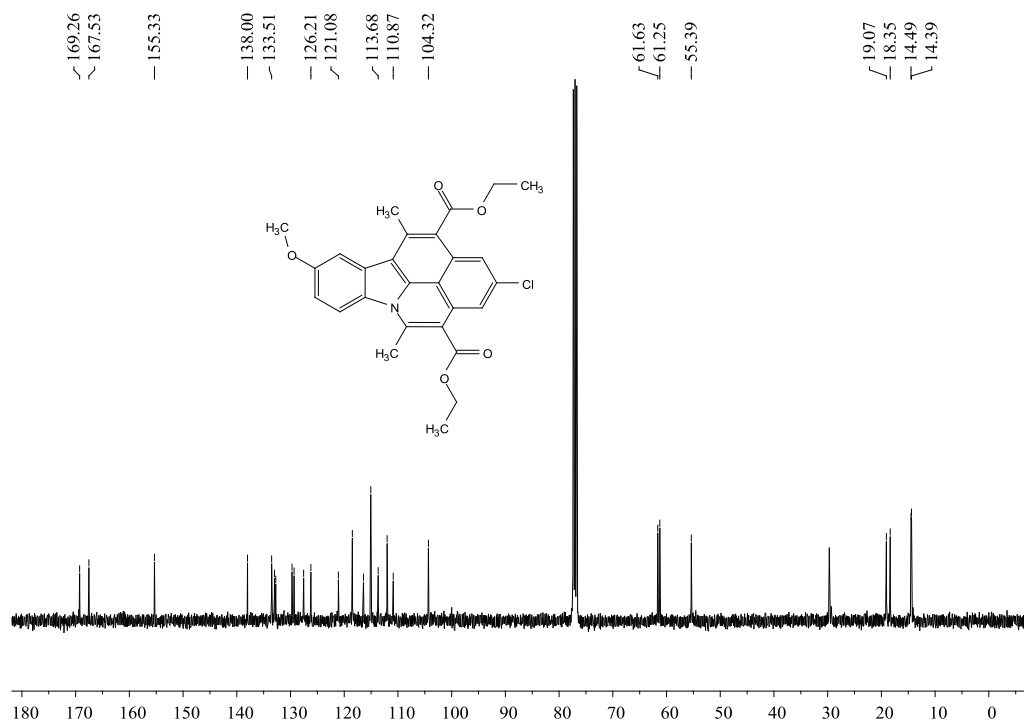

40) Ethyl 6,11-dimethyl-11H-benzo[a]carbazole-5-carboxylate (**5a**) (Using CDCl<sub>3</sub> as solvent)

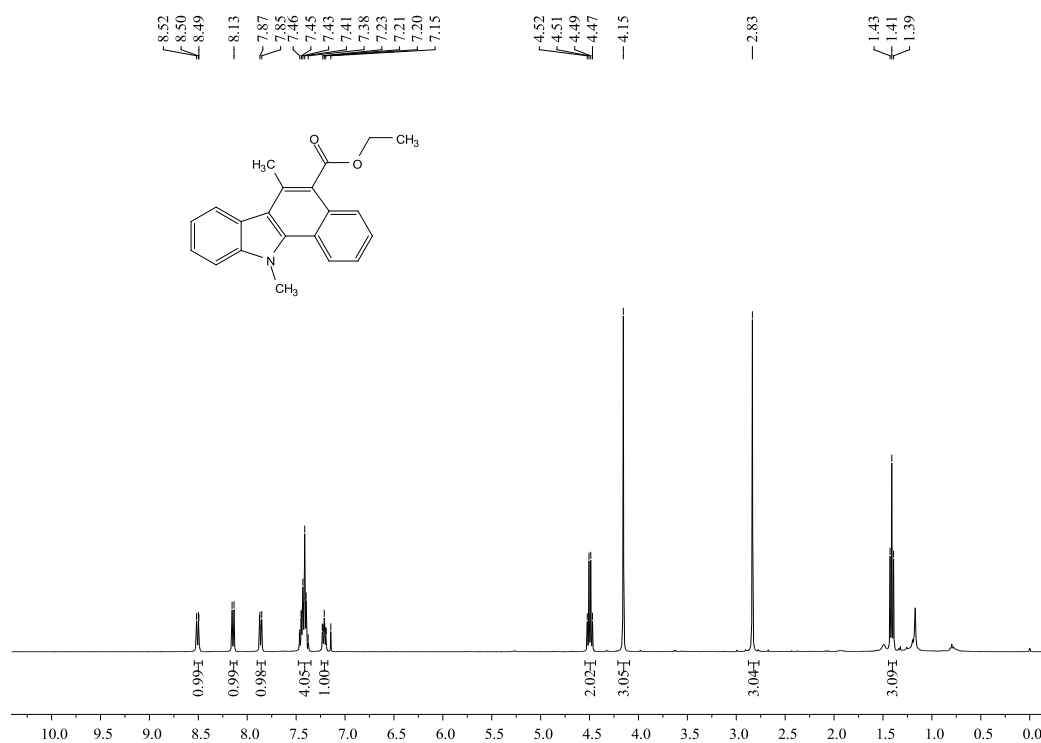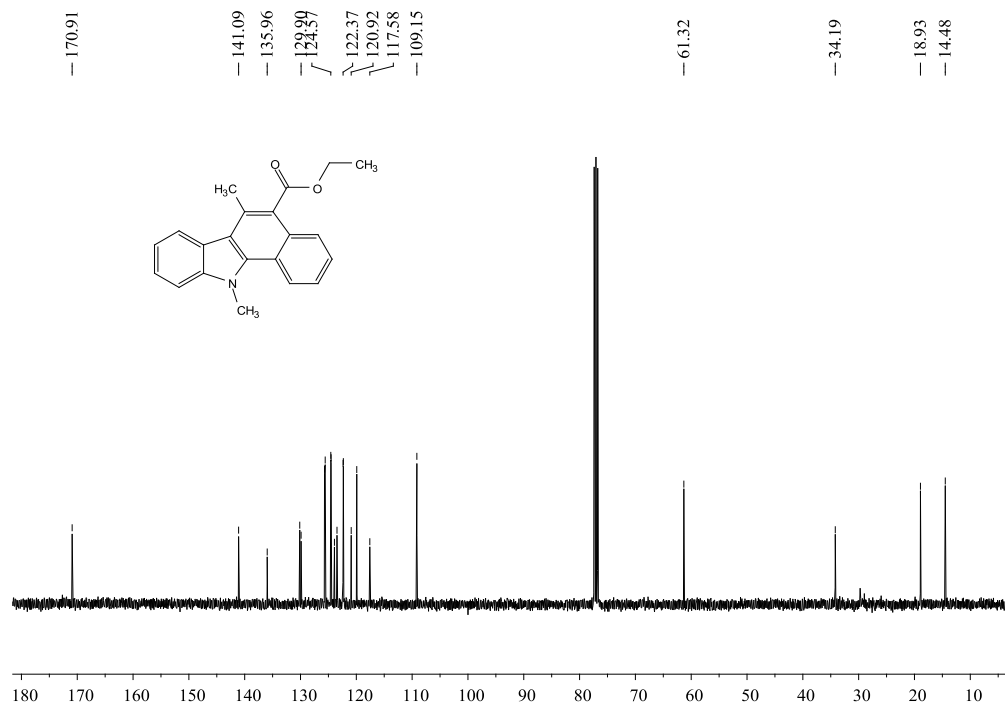

Supplement: c7ra04889k1.pdf [file c7ra04889k1.pdf]
